# Supplementary material for: Ancestral genetic legacy of the extant population of Argentina as predicted by autosomal and X-chromosomal DIPs
Source: Springer Nature journal article supplement (doi:10.1007/s00438-020-01755-w), 2021-02-13
Supplement: MOESM1 [file 438_2020_1755_MOESM1_ESM.xlsx]

## Sheet: Autosomal DIPs
	African	European	Native American	European vs African	European vs Native American	Native American vs African
				d	d	d
MID_473	0.97525	0.3913	0.0030303	0.58395	0.38827	0.97222
MID_273	0.21782	0.66957	1	0.45175	0.33043	0.78218
MID_1448	0.059406	0.54348	0.012121	0.484074	0.531359	0.047285
MID_856	0.43564	0.83696	0.24848	0.40132	0.58848	0.18716
MID_1632	0.94059	0.20044	0.82121	0.74015	0.62077	0.11938
MID_1172	0.58416	0.19783	0	0.38633	0.19783	0.58416
MID_93	0.20792	0.80568	0	0.59776	0.80568	0.20792
MID_1603	0.09901	0.39565	0.98485	0.29664	0.5892	0.88584
MID_1785	0.72277	0.22174	0.030488	0.50103	0.191252	0.692282
MID_1470	0.15347	0.6413	0.0030303	0.48783	0.63827	0.15044
MID_17	0.71287	0.29783	0.14242	0.41504	0.15541	0.57045
MID_216	0.73762	0.87174	0.36061	0.13412	0.51113	0.37701
MID_1013	0.27228	0.79565	0.29697	0.52337	0.49868	0.02469
MID_988	0.12871	0.31739	0.71818	0.18868	0.40079	0.58947
MID_1183	0.12871	0.25652	0.9303	0.12781	0.67378	0.80159
MID_2011	0.22772	0.75217	0.81818	0.52445	0.06601	0.59046
MID_2013	0.024752	0.19824	1	0.173488	0.80176	0.975248
MID_1357	0.13861	0.7	1	0.56139	0.3	0.86139
MID_818	0.77723	0.22609	0.018182	0.55114	0.207908	0.759048
MID_152	0.255	0.21739	0.92424	0.03761	0.70685	0.66924
MID_196	0.62376	0.56304	0.030303	0.06072	0.532737	0.593457
MID_1176	0.89604	0.34279	0.25152	0.55325	0.09127	0.64452
MID_1358	0.38614	0.86087	0.88957	0.47473	0.0287	0.50343
MID_51	0	0.57743	0.62727	0.57743	0.04984	0.62727
MID_322	0.91089	0.2587	0.51818	0.65219	0.25948	0.39271
MID_1271	0.089109	0.87826	0.28049	0.789151	0.59777	0.191381
MID_575	0.094059	0	0.66061	0.094059	0.66061	0.566551
MID_1052	0.14356	0.72609	0.72121	0.58253	0.00488	0.57765
MID_625	0.31683	0.67174	0.84146	0.35491	0.16972	0.52463
MID_1025	0.14356	0.83478	0.72121	0.69122	0.11357	0.57765
Average				0.433271	0.390415	0.53489

## Sheet: X-DIPs
del frequency	African	European	Native American	European vs African	European vs Native American	Native American vs African
				d	d	d
MID_2047	0.47239	0.26087	0.7803	0.21152	0.51943	0.30791
MID_3712*	0.39877	0.17391	0.34848	0.22486	0.17457	0.05029
MID_357	0.16564	0.29348	0.69697	0.12784	0.40349	0.53133
MID_356*	0.3681	0.054348	0.21212	0.313752	0.157772	0.15598
MID_3780*	0.30061	0.2967	0.68939	0.00391	0.39269	0.38878
MID_448804*	0.22086	0.48913	0.4697	0.26827	0.01943	0.24884
MID_3703*	0.15951	0.38043	0.10606	0.22092	0.27437	0.05345
MID_218	0.28834	0.82609	0.075758	0.53775	0.750332	0.212582
MID_3774	0.44785	0.086957	0.81061	0.360893	0.723653	0.36276
MID_3705	0.82209	0	0	0.82209	0	0.82209
MID_3706	0.24845	1	1	0.75155	0	0.75155
MID_304737	0.65839	0	0	0.65839	0	0.65839
MID_3692*	0.46914	0.1413	0	0.32784	0.1413	0.46914
MID_1445*	0.88272	0.79348	1	0.08924	0.20652	0.11728
MID_2694	0.71779	0.043478	0	0.674312	0.043478	0.71779
MID_2657*	0.04908	0	0	0.04908	0	0.04908
MID_1326	0.41358	0.30435	0.9697	0.10923	0.66535	0.55612
MID_2610	0.52761	0.032609	0	0.495001	0.032609	0.52761
MID_2600	0.53165	0.032967	0	0.498683	0.032967	0.53165
MID_184*	0.19632	0.45652	0	0.2602	0.45652	0.19632
MID_19147*	0.74847	0.78261	1	0.03414	0.21739	0.25153
MID_3754	0.5092	0.19565	0.7197	0.31355	0.52405	0.2105
MID_3756*	0.012346	0.52174	0.51515	0.509394	0.00659	0.502804
MID_1705	0.6135	0.098901	0.50758	0.514599	0.408679	0.10592
MID_3764	0.90741	0.81522	0.0075758	0.09219	0.807644	0.899834
MID_284601	0.049689	0.125	1	0.075311	0.875	0.950311
MID_103547	0.012346	0.11957	1	0.107224	0.88043	0.987654
MID_193	0.018519	0.21739	0.80303	0.198871	0.58564	0.784511
MID_358	0.33129	0.83146	0.9697	0.50017	0.13824	0.63841
MID_3763	0.7963	0.1087	0	0.6876	0.1087	0.7963
MID_3728	0.30675	0.92391	1	0.61716	0.07609	0.69325
MID_1540*	0.20859	0.3913	0.60606	0.18271	0.21476	0.39747
MID_2652	0.23926	0.76087	0.59848	0.52161	0.16239	0.35922
Average				0.344238	0.303033	0.463232
*markers with d<0.5

## Sheet: Autosomal DIP's not included
del frequency	African	European	Native American	European vs African	European vs Native American	Native American vs African
				d	d	d
MID_1039*	0.152	0.47	0.189	0.318	0.281	0.037
MID_1098*	0.292	0.455	0.31	0.162	0.145	0.018
MID_132*	0.23	0.614	0.542	0.384	0.072	0.312
MID_1391*	0.662	0.987	0.85	0.325	0.137	0.189
MID_1558*	0.108	0.581	0.416	0.473	0.165	0.308
MID_1684*	0.451	0.388	0.144	0.063	0.244	0.307
MID_1726*	0.214	0.658	0.639	0.445	0.019	0.426
MID_1780*	0.407	0.723	0.416	0.316	0.307	0.009
MID_1923*	0.284	0.222	0.368	0.062	0.146	0.084
MID_2070*	0.314	0.398	0.692	0.084	0.294	0.378
MID_217*	0.029	0.509	0.036	0.48	0.474	0.007
MID_275*	0.627	0.689	0.431	0.061	0.257	0.196
MID_350*	0.069	0.049	0.416	0.019	0.367	0.348
MID_481*	0.084	0.325	-	0.241	0.325	0.084
MID_494*	0.279	0.772	0.688	0.493	0.084	0.408
MID_558*	0.289	0.174	0.416	0.115	0.242	0.127
MID_568*	0.108	0.448	0.075	0.34	0.373	0.033
MID_660*	0.892	0.617	0.847	0.275	0.23	0.045
MID_778*	0.779	0.795	0.362	0.016	0.433	0.417
MID_913*	0.005	-	0.099	0.005	0.099	0.094
*markers with d<0.5 not included in the present set for ancestry estimation
