# Supplementary material for: Ancestral genetic legacy of the extant population of Argentina as predicted by autosomal and X-chromosomal DIPs
Source: Springer Nature journal article supplement (doi:10.1007/s00438-020-01755-w), 2021-02-13
Supplement: MOESM2 [file 438_2020_1755_MOESM2_ESM.xlsx]

## Sheet: AUTO
Sample	Pop	MID_473		MID_273		MID_1448		MID_856		MID_1632		MID_1172		MID_93		MID_1603		MID_1785		MID_1470		MID_17		MID_216		MID_1013		MID_988		MID_1183		MID_2011		MID_2013		MID_1357		MID_818		MID_152		MID_196		MID_1176		MID_1358		MID_51
AF004	African	1	1	2	2	1	2	2	2	1	1	1	2	2	2	2	2	1	2	1	2	1	2	1	1	1	2	1	2	2	2	2	2	2	2	1	2	1	2	2	2	1	1	1	2	1	2	2	2
AF038	African	1	1	1	2	1	2	1	2	1	1	1	1	1	2	2	2	1	2	2	2	1	1	1	2	1	2	2	2	1	2	2	2	2	2	2	2	1	2	2	2	1	1	1	1	2	2	2	2
AF039	African	1	1	2	2	2	2	2	2	1	1	1	1	2	2	2	2	1	1	2	2	2	2	1	1	1	2	2	2	1	2	2	2	2	2	1	2	1	1	2	2	1	1	1	1	1	2	2	2
AF044	African	1	1	2	2	2	2	1	2	1	1	1	1	1	2	2	2	1	2	2	2	1	1	1	1	1	2	1	2	2	2	2	2	2	2	2	2	1	1	1	1	1	1	1	1	1	2	2	2
AF049	African	1	1	1	1	2	2	1	2	1	1	1	2	2	2	1	1	1	2	2	2	1	2	1	1	1	1	2	2	2	2	2	2	2	2	2	2	1	1	2	2	1	1	1	1	2	2	2	2
AF064	African	1	1	2	2	2	2	1	1	1	1	1	2	2	2	2	2	1	2	2	2	1	1	1	1	2	2	2	2	2	2	2	2	2	2	2	2	1	1	1	1	1	2	1	1	1	1	2	2
AF073	African	1	1	2	2	2	2	1	2	1	1	1	1	1	2	2	2	1	2	2	2	1	2	1	2	2	2	1	2	2	2	1	2	2	2	2	2	1	1	1	2	1	1	1	2	2	2	2	2
AF074	African	1	1	2	2	2	2	1	2	1	2	2	2	2	2	2	2	1	1	2	2	1	1	2	2	1	1	2	2	2	2	2	2	2	2	2	2	1	2	2	2	1	1	1	2	2	2	2	2
AF080	African	1	1	2	2	2	2	2	2	1	1	2	2	2	2	1	2	1	2	2	2	1	2	1	1	2	2	2	2	1	2	2	2	2	2	1	2	1	2	2	2	1	1	1	1	2	2	2	2
AF082	African	1	1	1	1	2	2	1	1	1	1	1	2	2	2	2	2	1	2	2	2	1	2	1	1	2	2	2	2	2	2	2	2	2	2	2	2	1	1	1	2	1	2	1	1	2	2	2	2
AF093	African	1	1	2	2	2	2	1	2	1	1	2	2	1	1	2	2	1	1	1	2	1	1	1	1	2	2	2	2	2	2	1	1	1	2	2	2	1	1	1	2	1	2	1	1	1	2	2	2
AF094	African	1	1	1	2	2	2	2	2	1	1	1	2	2	2	2	2	1	1	2	2	1	1	1	1	2	2	2	2	1	2	1	1	2	2	1	2	1	1	1	1	1	1	1	2	2	2	2	2
AF114	African	1	1	2	2	2	2	1	1	1	1	1	2	1	2	2	2	1	2	1	2	1	1	1	1	2	2	2	2	1	2	2	2	2	2	2	2	1	1	1	2	1	2	1	1	1	2	2	2
AF406	African	1	1	2	2	2	2	2	2	1	1	1	1	2	2	2	2	1	2	1	2	1	2	1	2	1	2	2	2	1	2	2	2	2	2	2	2	1	1	2	2	1	1	1	1	1	2	2	2
AF407	African	1	1	2	2	2	2	1	2	1	1	1	2	1	2	2	2	1	2	2	2	1	1	1	1	2	2	2	2	2	2	1	2	2	2	2	2	1	1	1	1	1	1	1	1	1	2	2	2
AF408	African	1	1	2	2	2	2	1	2	1	1	1	2	1	2	2	2	1	1	2	2	1	2	2	2	1	2	1	2	2	2	2	2	2	2	2	2	1	2	2	2	1	2	1	1	1	2	2	2
AF409	African	1	1	2	2	2	2	1	2	1	1	1	1	2	2	2	2	1	1	2	2	1	2	1	2	2	2	1	2	2	2	1	2	2	2	1	2	1	2	2	2	1	2	1	2	2	2	2	2
AF410	African	1	1	2	2	2	2	1	2	1	1	2	2	2	2	2	2	1	2	1	2	1	2	1	2	1	2	2	2	2	2	2	2	2	2	2	2	1	2	2	2	2	2	1	2	1	2	2	2
AF413	African	1	1	1	2	2	2	1	1	1	1	1	2	2	2	2	2	1	1	1	2	1	2	1	1	1	2	2	2	2	2	1	2	2	2	2	2	1	2	2	2	1	2	1	1	1	2	2	2
AF414	African	1	1	1	2	2	2	1	1	1	1	1	2	1	2	2	2	1	2	2	2	1	1	1	1	1	2	2	2	2	2	1	2	2	2	1	2	1	1	2	2	2	2	1	1	1	2	2	2
AF415	African	1	1	2	2	2	2	1	2	1	1	1	1	2	2	2	2	1	1	1	2	1	1	1	1	1	2	2	2	2	2	2	2	2	2	1	2	1	1	1	2	1	2	1	1	2	2	2	2
AF417	African	1	1	2	2	2	2	2	2	1	1	1	1	2	2	2	2	1	2	2	2	1	1	1	2	1	2	2	2	2	2	1	2	2	2	2	2	1	1	2	2	2	2	1	1	1	2	2	2
AF420	African	1	1	1	2	2	2	2	2	1	1	1	2	2	2	1	2	1	2	2	2	1	2	1	2	1	2	2	2	2	2	1	2	2	2	1	2	1	2	1	2	1	1	1	1	1	1	2	2
AF421	African	1	1	1	2	2	2	1	1	1	1	1	1	2	2	1	2	2	2	1	2	1	1	1	2	2	2	2	2	1	2	2	2	2	2	2	2	1	1	2	2	1	1	1	1	1	2	2	2
AF423	African	1	1	2	2	2	2	1	2	1	2	1	2	2	2	2	2	1	2	2	2	1	2	1	2	1	2	2	2	2	2	2	2	2	2	2	2	1	2	1	1	1	2	1	2	1	1	2	2
AF424	African	1	2	2	2	2	2	1	1	1	1	1	2	1	1	2	2	1	1	2	2	1	2	1	1	2	2	2	2	2	2	1	2	2	2	2	2	1	2	0	0	2	2	1	1	2	2	2	2
AF425	African	1	2	2	2	2	2	2	2	1	1	1	2	2	2	2	2	2	2	2	2	1	2	1	1	1	2	2	2	2	2	2	2	2	2	2	2	1	1	2	2	1	2	1	1	1	2	2	2
AF426	African	1	1	2	2	2	2	1	1	1	1	2	2	2	2	1	2	1	2	1	1	2	2	1	2	1	2	2	2	1	2	2	2	2	2	2	2	1	2	2	2	2	2	1	1	2	2	2	2
AF427	African	1	1	2	2	2	2	1	2	1	1	2	2	2	2	2	2	1	2	1	2	1	1	1	1	2	2	2	2	2	2	2	2	1	2	2	2	1	2	1	2	1	2	1	1	2	2	2	2
AF428	African	1	1	1	2	1	2	1	2	1	1	1	1	1	2	2	2	1	1	2	2	1	2	1	2	1	2	2	2	2	2	1	1	2	2	2	2	1	1	2	2	1	1	1	1	1	2	2	2
C501	African	1	1	2	2	2	2	1	2	1	2	1	2	2	2	2	2	1	1	2	2	1	1	1	1	1	2	2	2	2	2	1	2	2	2	1	2	1	1	2	2	2	2	1	1	1	2	2	2
C502	African	1	1	2	2	2	2	2	2	1	1	2	2	2	2	2	2	1	1	2	2	1	2	1	2	2	2	1	2	2	2	2	2	2	2	2	2	1	1	2	2	2	2	1	1	1	2	2	2
C503	African	1	1	2	2	2	2	1	1	1	1	1	2	1	2	2	2	1	2	2	2	1	1	1	1	2	2	2	2	1	2	2	2	1	2	2	2	1	1	2	2	1	2	1	1	1	2	2	2
C504	African	1	1	1	2	2	2	1	1	1	1	2	2	2	2	2	2	1	1	1	2	1	2	1	1	2	2	2	2	1	2	2	2	2	2	1	2	1	1	2	2	1	1	1	1	1	2	2	2
C505	African	1	1	2	2	1	2	1	1	1	1	1	2	1	2	2	2	1	1	2	2	1	1	1	1	1	2	2	2	2	2	2	2	2	2	1	2	1	2	1	2	1	1	1	1	2	2	2	2
C506	African	1	2	1	2	2	2	1	1	1	2	1	2	1	2	2	2	1	1	2	2	1	1	1	1	1	2	2	2	2	2	2	2	2	2	1	2	1	1	2	2	1	2	1	1	1	2	2	2
C507	African	1	1	1	2	2	2	2	2	1	1	1	2	2	2	2	2	1	1	2	2	1	2	1	1	2	2	2	2	2	2	2	2	2	2	2	2	1	1	1	1	1	1	1	1	2	2	2	2
C508	African	1	1	2	2	2	2	1	1	1	2	1	1	2	2	2	2	1	1	2	2	1	1	1	1	2	2	1	2	2	2	2	2	2	2	2	2	1	1	1	2	2	2	1	1	1	1	2	2
C509	African	1	1	2	2	2	2	1	2	1	1	1	1	2	2	2	2	1	1	2	2	1	2	2	2	2	2	2	2	2	2	1	1	2	2	2	2	1	1	2	2	2	2	1	1	1	1	2	2
C510	African	1	1	2	2	2	2	2	2	1	1	2	2	2	2	2	2	1	1	1	2	1	1	1	2	2	2	2	2	2	2	1	2	2	2	2	2	1	1	1	2	1	2	1	1	1	2	2	2
C513	African	1	1	2	2	2	2	1	2	1	1	1	2	2	2	2	2	1	2	1	2	1	1	1	1	2	2	2	2	2	2	2	2	2	2	2	2	1	2	2	2	1	1	1	1	1	1	2	2
C514	African	1	1	2	2	2	2	1	2	1	1	1	2	2	2	2	2	1	2	1	2	1	2	1	1	2	2	2	2	1	1	2	2	2	2	2	2	1	1	2	2	1	2	1	2	2	2	2	2
C516	African	1	1	2	2	2	2	1	2	1	1	1	2	2	2	1	2	1	1	1	2	2	2	1	1	1	2	1	2	2	2	2	2	1	2	2	2	1	2	1	2	1	1	1	1	1	1	2	2
C517	African	1	1	2	2	2	2	2	2	1	1	1	1	1	2	1	1	1	2	1	2	1	1	1	1	2	2	1	2	2	2	1	2	2	2	2	2	1	1	2	2	1	2	1	1	2	2	2	2
C518	African	1	1	1	2	2	2	2	2	1	1	1	2	1	2	2	2	1	1	2	2	1	1	1	1	2	2	2	2	2	2	2	2	2	2	1	2	1	1	1	2	1	1	1	1	1	2	2	2
C519	African	1	1	2	2	1	2	1	2	1	1	2	2	2	2	2	2	1	2	1	2	1	2	1	1	1	1	2	2	1	2	2	2	2	2	2	2	1	1	2	2	1	1	1	1	1	2	2	2
C520	African	1	1	2	2	2	2	2	2	1	1	2	2	2	2	2	2	1	1	2	2	1	2	1	2	2	2	1	2	2	2	2	2	2	2	2	2	1	2	1	2	2	2	1	1	2	2	2	2
C521	African	1	1	2	2	2	2	2	2	1	1	1	1	2	2	2	2	1	2	2	2	1	2	1	2	2	2	1	2	2	2	1	2	2	2	2	2	1	1	1	2	2	2	1	1	2	2	2	2
C522	African	1	1	1	2	2	2	1	1	1	1	2	2	2	2	2	2	1	2	2	2	1	1	1	1	2	2	2	2	2	2	2	2	2	2	2	2	2	2	2	2	1	2	1	1	1	2	2	2
C523	African	1	1	2	2	1	2	2	2	1	1	1	1	2	2	2	2	1	1	2	2	1	2	1	2	1	2	1	2	1	2	1	2	2	2	2	2	1	1	1	2	1	2	1	1	1	2	2	2
C525	African	1	1	1	2	2	2	2	2	1	1	1	1	2	2	2	2	1	2	2	2	1	1	1	1	2	2	2	2	1	2	1	2	2	2	2	2	1	2	2	2	2	2	1	1	1	1	2	2
C526	African	1	1	1	2	2	2	2	2	1	2	1	2	1	2	2	2	1	2	2	2	1	2	1	1	2	2	2	2	2	2	2	2	2	2	2	2	1	2	1	2	2	2	1	1	2	2	2	2
C527	African	1	1	1	2	2	2	1	2	1	1	2	2	2	2	2	2	1	1	1	2	1	2	1	2	1	2	1	2	2	2	2	2	2	2	2	2	1	2	2	2	1	1	1	1	2	2	2	2
C529	African	1	1	2	2	2	2	1	2	1	1	1	1	2	2	1	2	1	1	2	2	1	1	1	2	2	2	1	2	1	2	2	2	2	2	2	2	1	1	2	2	1	2	1	1	1	1	2	2
C530	African	1	1	2	2	2	2	1	2	1	2	1	2	2	2	2	2	1	1	2	2	1	1	1	1	1	2	2	2	2	2	2	2	2	2	2	2	1	2	1	2	1	2	1	2	2	2	2	2
C531	African	1	1	1	2	2	2	2	2	1	1	1	2	1	2	2	2	1	1	2	2	1	2	1	1	2	2	2	2	2	2	1	2	2	2	2	2	1	2	2	2	1	1	1	1	2	2	2	2
C532	African	1	1	1	2	2	2	1	2	1	2	2	2	1	1	2	2	1	1	2	2	2	2	1	1	2	2	2	2	2	2	2	2	2	2	2	2	1	2	1	2	1	1	1	1	1	2	2	2
C533	African	1	1	2	2	2	2	2	2	1	1	1	2	1	2	2	2	1	2	2	2	1	2	1	1	2	2	2	2	2	2	2	2	2	2	2	2	1	1	1	2	1	2	1	1	1	1	2	2
C534	African	1	1	2	2	2	2	2	2	1	1	1	2	2	2	1	2	1	1	2	2	1	1	1	1	2	2	2	2	2	2	1	2	2	2	2	2	1	1	1	2	2	2	1	1	2	2	2	2
CM017	African	1	1	1	2	2	2	1	2	1	1	1	1	1	2	2	2	1	1	2	2	1	1	1	2	1	1	1	1	2	2	1	2	2	2	1	2	1	1	1	2	2	2	1	1	2	2	2	2
CM018	African	1	1	2	2	1	2	1	1	1	1	2	2	2	2	2	2	1	2	2	2	1	1	1	1	1	2	2	2	2	2	2	2	2	2	1	2	1	2	2	2	1	1	1	1	2	2	2	2
CM019	African	1	1	2	2	2	2	1	2	1	1	1	2	2	2	1	2	1	1	2	2	1	2	1	1	1	2	2	2	1	2	2	2	2	2	2	2	1	1	2	2	1	2	1	2	2	2	2	2
CM020	African	1	1	2	2	2	2	1	2	1	1	1	1	2	2	2	2	1	1	2	2	1	2	1	2	1	2	2	2	2	2	2	2	2	2	2	2	1	1	1	2	1	2	1	1	2	2	2	2
CM022	African	1	1	2	2	2	2	1	2	1	1	1	1	1	2	2	2	1	1	1	2	1	1	2	2	2	2	1	2	2	2	2	2	2	2	2	2	1	1	1	2	1	1	1	1	1	2	2	2
CM024	African	1	1	2	2	2	2	2	2	1	1	1	1	2	2	2	2	1	2	2	2	1	1	2	2	2	2	2	2	2	2	2	2	2	2	2	2	1	2	2	2	1	1	1	1	2	2	2	2
CM025	African	1	1	2	2	2	2	1	1	1	1	1	2	2	2	2	2	1	1	1	2	1	1	1	1	2	2	2	2	1	2	1	2	2	2	2	2	1	1	1	2	1	1	1	2	2	2	2	2
CM027	African	1	1	2	2	2	2	2	2	1	1	1	2	1	2	2	2	1	1	2	2	1	2	1	2	1	2	2	2	2	2	1	2	2	2	2	2	1	1	1	2	1	1	1	2	1	2	2	2
CM058	African	1	1	2	2	1	2	1	2	1	1	1	2	1	2	1	2	1	1	1	2	1	2	1	1	2	2	2	2	2	2	1	2	2	2	2	2	1	2	2	2	1	1	1	2	1	1	2	2
CM059	African	1	1	2	2	1	2	1	1	1	1	1	1	2	2	2	2	1	2	2	2	2	2	1	2	2	2	1	2	1	2	2	2	2	2	2	2	1	2	2	2	1	1	1	2	1	2	2	2
CM060	African	1	1	2	2	2	2	1	1	1	1	1	1	2	2	2	2	1	2	2	2	1	1	1	2	1	2	2	2	1	2	1	2	2	2	1	2	1	1	2	2	1	1	1	1	1	2	2	2
CM063	African	1	1	2	2	2	2	1	1	1	1	1	2	1	1	1	2	1	1	2	2	1	1	2	2	2	2	2	2	2	2	1	1	2	2	2	2	1	1	2	2	1	2	1	1	2	2	2	2
CM064	African	1	1	2	2	2	2	1	2	1	1	1	1	2	2	2	2	1	2	2	2	1	2	1	2	1	2	2	2	1	2	2	2	2	2	2	2	1	1	1	2	2	2	1	1	1	2	2	2
CM068	African	1	1	2	2	2	2	2	2	1	1	1	1	1	2	1	1	1	2	1	2	1	2	1	1	2	2	2	2	2	2	2	2	2	2	2	2	1	1	2	2	1	1	1	2	2	2	2	2
CM091	African	1	1	1	1	2	2	2	2	1	1	1	2	1	2	2	2	1	2	2	2	1	2	1	1	2	2	1	2	2	2	1	2	2	2	2	2	1	1	2	2	1	2	1	1	2	2	2	2
CM092	African	1	1	1	1	2	2	2	2	1	1	1	1	1	2	1	2	1	1	2	2	1	1	2	2	2	2	2	2	2	2	1	2	2	2	2	2	1	2	1	1	1	1	1	1	1	2	2	2
CM093	African	1	1	1	2	2	2	1	2	1	1	2	2	1	2	2	2	1	1	2	2	1	2	1	1	1	2	1	2	1	2	2	2	2	2	2	2	1	2	2	2	1	2	1	1	1	2	2	2
CM094	African	1	1	1	1	2	2	2	2	1	1	1	1	2	2	1	2	1	1	2	2	1	2	1	1	2	2	1	2	2	2	2	2	2	2	2	2	1	1	2	2	1	2	1	1	1	2	2	2
CM095	African	1	1	1	2	2	2	2	2	1	1	1	2	2	2	2	2	1	1	1	2	1	1	1	1	2	2	2	2	2	2	1	2	1	2	2	2	1	1	2	2	1	1	1	1	1	1	2	2
CM096	African	1	1	2	2	2	2	1	1	1	2	1	1	2	2	2	2	1	2	1	2	1	1	1	1	1	1	2	2	2	2	1	2	2	2	2	2	1	1	2	2	1	1	1	2	1	1	2	2
CM097	African	1	1	2	2	2	2	2	2	1	2	2	2	2	2	1	2	1	2	2	2	1	1	1	1	2	2	2	2	1	2	2	2	2	2	2	2	1	1	1	2	1	1	1	1	1	2	2	2
CM102	African	1	1	1	2	1	2	1	2	1	1	1	1	2	2	2	2	1	1	2	2	2	2	2	2	2	2	2	2	1	2	1	2	2	2	1	2	1	1	1	2	2	2	1	1	2	2	2	2
CM104	African	1	1	1	2	2	2	2	2	1	2	1	2	1	2	1	2	1	1	1	2	1	1	1	1	1	2	2	2	2	2	1	2	2	2	2	2	1	2	2	2	1	2	1	1	1	2	2	2
CM105	African	1	2	2	2	2	2	1	2	1	1	1	2	1	1	2	2	1	2	2	2	1	1	2	2	1	1	2	2	2	2	2	2	2	2	2	2	1	1	2	2	1	2	1	1	2	2	2	2
CM108	African	1	1	2	2	2	2	1	2	1	1	1	2	1	2	2	2	1	1	2	2	1	1	1	2	1	2	2	2	2	2	2	2	2	2	1	2	1	1	2	2	1	2	1	1	1	2	2	2
CM110	African	1	2	2	2	2	2	2	2	1	1	1	2	2	2	2	2	1	2	1	2	1	2	1	1	2	2	1	2	1	2	2	2	2	2	2	2	1	1	2	2	1	2	1	2	2	2	2	2
CM112	African	1	1	2	2	2	2	2	2	1	1	1	1	2	2	2	2	1	2	1	2	1	2	1	2	2	2	2	2	2	2	1	1	2	2	2	2	1	1	1	1	1	1	1	1	1	2	2	2
CM119	African	1	1	2	2	2	2	1	2	1	1	1	1	1	2	2	2	1	1	2	2	1	1	1	1	1	2	1	2	2	2	1	1	2	2	2	2	1	1	2	2	2	2	1	2	1	2	2	2
CM120	African	1	1	2	2	2	2	2	2	1	1	1	2	2	2	2	2	1	1	2	2	1	2	1	2	1	2	2	2	2	2	2	2	2	2	2	2	1	1	1	2	1	1	1	1	1	2	2	2
CM121	African	1	1	2	2	2	2	1	1	1	1	1	2	1	2	2	2	1	1	2	2	1	2	1	1	1	2	2	2	2	2	2	2	2	2	2	2	1	2	2	2	1	1	1	1	1	1	2	2
CM140	African	1	1	1	2	2	2	2	2	1	1	2	2	2	2	2	2	1	1	2	2	1	2	1	2	1	2	2	2	2	2	1	1	2	2	2	2	1	1	2	2	1	2	1	1	1	2	2	2
CM141	African	1	1	2	2	2	2	1	2	1	1	1	1	1	2	2	2	1	1	2	2	1	1	2	2	1	2	2	2	2	2	2	2	2	2	2	2	1	1	2	2	1	2	1	1	1	2	2	2
CM142	African	1	1	2	2	2	2	1	1	1	1	2	2	2	2	2	2	2	2	2	2	1	1	1	2	2	2	2	2	2	2	2	2	2	2	2	2	1	2	2	2	1	2	1	1	2	2	2	2
CM145	African	1	1	1	2	2	2	2	2	1	1	1	2	2	2	2	2	1	2	1	2	2	2	1	2	2	2	2	2	2	2	1	2	2	2	2	2	1	1	1	2	1	1	1	1	1	2	2	2
CM146	African	1	1	2	2	2	2	1	2	1	2	1	2	2	2	2	2	1	2	1	1	1	1	1	1	1	2	1	2	2	2	1	2	2	2	2	2	1	2	2	2	1	1	1	1	2	2	2	2
CM148	African	1	1	1	2	1	2	1	1	1	1	1	1	1	1	2	2	1	1	2	2	2	2	1	2	2	2	2	2	2	2	2	2	2	2	2	2	1	1	2	2	1	2	1	1	1	1	2	2
CM168	African	1	1	1	2	2	2	2	2	1	1	1	1	2	2	2	2	1	1	2	2	1	1	1	1	2	2	1	2	2	2	1	2	2	2	2	2	1	1	1	2	1	1	1	2	2	2	2	2
Z251	African	1	1	1	1	1	2	1	1	1	1	1	1	2	2	2	2	2	2	2	2	1	1	1	2	1	2	2	2	1	2	2	2	2	2	1	1	2	2	1	1	1	2	1	2	2	2	2	2
Z273	African	1	1	1	1	2	2	1	2	1	1	1	1	1	2	2	2	1	1	2	2	1	1	1	1	1	2	1	2	2	2	2	2	2	2	1	1	2	2	2	2	1	2	1	1	1	2	2	2
Z323	African	1	1	1	1	2	2	1	2	1	1	1	2	2	2	2	2	2	2	2	2	1	1	1	1	1	2	2	2	2	2	2	2	2	2	1	1	2	2	2	2	1	2	1	2	2	2	2	2
Z395	African	1	1	1	2	2	2	1	2	1	1	1	2	2	2	2	2	2	2	2	2	1	1	1	1	1	1	2	2	2	2	2	2	2	2	1	1	2	2	1	1	1	2	1	1	1	1	2	2
Z558	African	1	1	1	2	2	2	2	2	1	1	1	2	2	2	2	2	2	2	2	2	1	1	1	2	2	2	2	2	2	2	2	2	2	2	1	1	2	2	2	2	1	2	1	1	1	1	2	2
PP100	European	1	2	1	2	1	2	1	1	2	2	2	2	1	1	2	2	2	2	1	1	1	1	1	1	1	2	2	2	2	2	1	2	1	2	1	2	2	2	1	2	1	2	1	2	1	2	1	2
PP101	European	2	2	1	1	2	2	1	1	2	2	2	2	1	1	1	1	2	2	1	1	2	2	1	1	1	1	2	2	2	2	1	2	2	2	1	1	2	2	2	2	1	1	1	2	2	2	1	2
PP102	European	1	2	2	2	1	1	1	2	2	2	2	2	1	1	2	2	2	2	1	2	2	2	1	1	1	2	1	1	1	1	1	1	2	2	1	2	2	2	2	2	1	1	2	2	1	1	1	2
PP150	European	1	1	1	1	1	2	1	1	1	2	2	2	1	1	1	2	2	2	1	1	2	2	1	1	1	1	1	2	2	2	1	2	2	2	1	2	2	2	1	2	1	1	1	1	1	1	1	2
PP152	European	1	2	1	1	1	2	1	2	2	2	2	2	1	2	1	2	1	2	1	2	1	2	1	1	1	1	2	2	2	2	1	1	2	2	1	2	2	2	2	2	2	2	1	2	1	1	1	2
PP154	European	1	1	1	2	1	1	1	1	1	2	2	2	2	2	1	1	2	2	1	2	1	1	1	1	2	2	1	2	1	2	1	2	2	2	1	1	2	2	2	2	1	2	2	2	1	1	1	1
PP157	European	2	2	1	1	2	2	2	2	2	2	2	2	1	1	1	2	2	2	1	1	1	1	1	1	1	1	2	2	1	2	1	1	2	2	1	2	2	2	1	2	1	2	1	1	1	1	2	2
PP158	European	2	2	2	2	1	1	1	1	2	2	1	2	1	2	1	2	1	2	2	2	2	2	1	1	1	1	2	2	2	2	1	1	2	2	1	1	1	2	1	2	1	2	1	2	1	1	1	1
PP160	European	2	2	1	2	1	1	1	2	2	2	1	2	1	1	2	2	2	2	1	1	2	2	1	1	1	1	1	2	1	2	1	2	1	2	1	1	1	2	2	2	2	2	2	2	1	1	1	2
PP162	European	1	2	1	1	1	2	1	2	2	2	2	2	1	1	1	2	1	1	1	2	2	2	1	1	1	1	2	2	1	2	1	1	2	2	1	2	2	2	1	2	2	2	2	2	1	1	1	2
PP164	European	2	2	1	1	1	2	1	2	1	2	2	2	1	1	1	2	1	1	1	2	2	2	1	1	1	1	1	2	2	2	2	2	2	2	1	1	2	2	2	2	1	2	2	2	1	2	1	1
PP165	European	1	2	1	2	1	2	1	1	2	2	1	2	1	1	1	1	2	2	1	2	2	2	1	1	1	2	2	2	2	2	1	2	2	2	1	1	1	2	2	2	1	1	1	1	1	1	1	2
PP166	European	1	2	2	2	1	1	1	1	2	2	2	2	1	2	2	2	2	2	2	2	2	2	1	1	1	2	2	2	1	2	1	2	1	2	1	2	2	2	1	2	1	1	1	2	1	2	2	2
PP177	European	1	2	2	2	2	2	1	1	2	2	2	2	1	1	2	2	2	2	1	2	1	1	1	1	1	2	1	2	1	2	1	2	1	2	1	2	2	2	1	2	2	2	1	2	1	1	2	2
PP179	European	1	2	2	2	1	2	1	1	1	2	2	2	1	1	2	2	2	2	2	2	2	2	1	2	1	1	2	2	2	2	2	2	1	2	1	1	2	2	1	2	1	1	2	2	1	1	2	2
PP180	European	1	1	1	1	1	1	1	1	2	2	2	2	1	1	1	2	1	1	1	1	1	2	1	1	1	1	1	2	1	2	1	1	1	2	1	1	2	2	1	1	1	2	2	2	1	1	1	2
PP181	European	1	2	1	2	1	1	1	1	1	2	1	2	1	2	1	2	2	2	1	2	1	2	1	1	1	2	2	2	2	2	1	2	2	2	1	1	1	2	2	2	1	1	2	2	1	1	1	1
PP195	European	1	2	1	1	1	1	1	2	2	2	2	2	2	2	2	2	2	2	1	1	1	2	1	1	1	1	1	2	1	2	1	2	1	2	1	1	2	2	2	2	2	2	1	1	1	1	1	1
PP196	European	2	2	1	2	2	2	1	1	2	2	2	2	1	2	1	1	2	2	1	1	2	2	2	2	1	1	1	2	1	2	2	2	2	2	1	2	1	2	2	2	1	1	2	2	1	1	1	2
PP244	European	1	1	2	2	1	2	1	1	2	2	2	2	1	1	2	2	2	2	1	2	2	2	1	1	1	1	2	2	2	2	1	2	1	2	1	2	2	2	2	2	1	1	1	2	1	1	2	2
PP246	European	1	2	1	2	2	2	1	2	2	2	2	2	1	2	1	2	2	2	1	2	2	2	1	1	1	2	1	2	2	2	1	1	1	2	1	1	2	2	1	2	1	2	1	2	1	2	2	2
PP247	European	1	1	2	2	1	2	1	1	2	2	1	2	1	1	2	2	1	2	1	2	2	2	1	1	1	1	1	2	2	2	1	1	2	2	1	1	1	2	2	2	1	2	2	2	1	2	1	2
PP248	European	1	2	1	2	2	2	1	2	1	2	1	2	1	1	1	1	2	2	1	2	1	2	1	1	1	2	2	2	2	2	1	1	1	2	1	2	1	1	2	2	2	2	2	2	2	2	1	2
PP252	European	1	2	1	2	1	2	1	1	2	2	2	2	2	2	2	2	1	2	1	2	2	2	1	1	1	1	1	2	1	2	1	1	1	2	2	2	2	2	2	2	1	2	2	2	1	1	2	2
PP253	European	1	2	1	1	1	2	1	1	2	2	1	2	1	1	2	2	2	2	1	1	2	2	1	1	1	1	2	2	1	2	1	1	1	2	1	2	1	2	2	2	1	1	2	2	1	1	1	2
PP254	European	2	2	2	2	1	2	1	1	1	2	1	2	1	1	2	2	2	2	1	2	1	1	1	1	1	1	1	2	1	2	1	2	2	2	1	2	1	2	1	2	1	2	1	1	1	1	1	2
PP256	European	1	2	1	2	1	1	1	1	1	2	1	2	1	1	1	2	1	2	1	1	2	2	1	1	1	1	2	2	2	2	1	1	1	2	1	2	1	2	2	2	1	1	1	2	1	2	1	2
PP257	European	2	2	1	1	1	1	1	2	1	2	1	2	1	1	2	2	2	2	1	2	2	2	1	1	1	1	2	2	2	2	2	2	1	2	1	2	1	2	2	2	1	1	1	2	1	1	1	2
PP258	European	1	2	1	2	1	1	1	1	2	2	2	2	1	1	1	1	1	1	2	2	2	2	1	1	1	1	1	2	1	2	1	1	2	2	1	1	2	2	2	2	1	2	2	2	1	2	1	2
PP259	European	2	2	1	1	1	1	1	1	2	2	1	2	1	2	2	2	2	2	1	1	2	2	1	1	1	2	2	2	2	2	1	1	1	1	2	2	1	2	2	2	1	1	1	2	1	1	1	1
PP260	European	2	2	1	2	1	1	1	1	2	2	2	2	1	1	1	1	2	2	1	2	2	2	1	1	1	2	2	2	2	2	2	2	2	2	1	1	1	1	2	2	1	2	2	2	1	1	1	2
PP263	European	1	1	2	2	2	2	1	1	2	2	2	2	2	2	1	1	2	2	1	2	1	1	1	2	1	1	1	2	2	2	1	2	2	2	1	1	2	2	2	2	1	2	1	2	1	1	1	2
PP266	European	1	2	2	2	1	1	1	1	0	0	2	2	1	2	1	1	2	2	2	2	1	2	1	1	1	1	1	1	1	2	2	2	0	0	1	1	2	2	2	2	1	1	1	2	1	1	1	1
PP268	European	2	2	1	1	1	1	1	1	1	2	2	2	1	1	1	2	1	2	2	2	2	2	1	1	1	2	1	2	1	2	1	1	1	1	2	2	1	2	2	2	1	2	1	2	1	1	1	2
PP269	European	1	1	1	1	1	1	1	1	1	2	2	2	2	2	1	1	1	2	1	1	1	2	1	1	1	1	1	1	1	2	1	2	2	2	2	2	2	2	2	2	2	2	1	2	1	1	0	0
PP305	European	2	2	1	1	2	2	1	2	2	2	2	2	1	1	2	2	2	2	1	1	1	2	1	1	1	1	1	2	1	2	1	1	2	2	1	2	2	2	2	2	1	2	2	2	1	1	1	2
PP306	European	1	2	1	2	2	2	1	1	2	2	2	2	1	2	2	2	2	2	1	1	1	1	1	1	1	1	2	2	1	2	2	2	2	2	1	1	2	2	2	2	1	1	1	1	1	1	1	1
PP307	European	1	1	1	1	2	2	1	2	1	2	2	2	1	1	1	2	1	2	1	2	1	2	1	2	1	2	1	2	1	2	1	2	1	2	1	2	2	2	1	2	1	2	1	2	1	1	2	2
PP309	European	2	2	1	1	1	2	1	1	1	2	1	2	1	1	2	2	2	2	1	1	2	2	1	1	1	2	2	2	2	2	1	2	2	2	1	2	1	2	2	2	1	2	2	2	1	2	1	1
PP336	European	1	2	1	2	1	1	1	2	1	2	1	2	1	1	2	2	1	2	1	2	1	2	1	1	1	1	2	2	2	2	1	2	1	2	1	1	1	2	1	1	1	2	2	2	1	1	1	2
PP337	European	1	2	1	1	1	2	1	2	2	2	2	2	1	1	2	2	2	2	1	1	2	2	1	2	2	2	1	2	2	2	1	1	1	2	1	2	2	2	1	2	1	2	2	2	1	1	2	2
PP343	European	2	2	1	2	1	2	1	1	2	2	1	2	2	2	1	2	1	2	1	2	2	2	1	1	1	2	1	2	1	2	1	1	1	2	1	2	1	2	2	2	2	2	1	2	1	1	1	2
PP344	European	1	1	1	2	2	2	1	1	1	2	2	2	1	1	1	2	2	2	1	2	2	2	1	1	1	1	1	1	1	1	1	2	2	2	1	2	2	2	2	2	1	1	1	2	1	2	1	1
PP345	European	2	2	1	1	1	2	1	1	2	2	2	2	1	2	1	2	2	2	1	2	2	2	1	2	1	1	2	2	1	2	1	2	2	2	1	1	2	2	2	2	2	2	1	2	1	1	1	2
PP348	European	1	1	1	1	1	2	1	2	2	2	1	2	1	2	1	2	2	2	1	2	2	2	1	1	1	1	1	2	2	2	1	1	2	2	1	1	1	2	1	2	1	2	2	2	1	1	1	1
PP349	European	1	2	1	2	1	2	1	1	1	2	2	2	1	1	1	1	2	2	1	2	1	2	1	1	1	1	1	1	1	2	1	1	1	2	1	1	2	2	2	2	1	2	2	2	1	1	1	1
PP350	European	1	2	1	1	1	1	2	2	2	2	2	2	1	2	2	2	1	1	2	2	2	2	1	2	1	1	2	2	2	2	1	2	1	2	1	1	2	2	2	2	1	2	1	2	1	2	1	2
PP351	European	1	2	1	2	1	1	1	1	2	2	2	2	1	2	1	2	1	1	1	2	1	2	1	1	1	1	2	2	2	2	1	1	2	2	1	2	2	2	1	1	1	2	1	2	1	1	1	2
PP354	European	1	2	1	2	1	1	1	2	2	2	2	2	1	2	1	2	2	2	1	1	2	2	1	1	1	1	1	2	1	2	2	2	1	2	2	2	2	2	1	2	2	2	1	1	1	1	2	2
PP356	European	1	1	1	1	2	2	1	1	2	2	2	2	1	2	1	1	2	2	1	2	2	2	1	1	1	2	1	1	2	2	1	1	1	2	2	2	2	2	1	2	1	2	1	2	1	1	2	2
PP360	European	1	1	1	2	1	2	1	2	2	2	2	2	1	1	1	2	1	1	1	1	2	2	1	1	1	1	2	2	2	2	1	1	1	2	2	2	2	2	1	2	1	1	1	2	1	1	1	1
PP368	European	1	2	1	1	1	2	1	1	0	0	2	2	1	1	2	2	2	2	1	1	1	1	1	1	1	1	1	2	1	2	2	2	0	0	2	2	2	2	1	2	1	2	1	2	1	1	1	2
PP371	European	1	1	1	2	2	2	1	1	1	2	2	2	1	2	2	2	2	2	1	1	2	2	1	1	1	1	1	2	1	2	1	1	2	2	1	1	2	2	1	2	1	2	1	1	1	2	2	2
PP373	European	1	1	2	2	2	2	1	2	1	2	2	2	2	2	1	2	2	2	1	2	1	2	1	1	1	2	1	2	1	2	1	1	2	2	1	2	2	2	2	2	1	2	1	2	1	2	1	1
PP377	European	2	2	1	1	1	1	1	1	1	2	1	2	1	1	2	2	1	1	1	2	2	2	1	1	2	2	2	2	2	2	1	1	1	2	1	2	1	2	2	2	1	1	1	2	1	1	1	2
PP381	European	1	2	2	2	1	2	1	2	1	2	2	2	1	1	1	1	1	2	1	1	2	2	1	1	1	2	2	2	1	1	1	1	2	2	2	2	2	2	2	2	1	2	1	1	1	1	1	1
PP385	European	1	2	1	1	1	2	1	1	2	2	2	2	1	1	2	2	1	2	1	2	1	1	1	2	2	2	1	2	1	2	1	2	2	2	1	1	2	2	1	2	1	2	2	2	1	1	2	2
PP396	European	2	2	1	2	1	1	1	1	2	2	2	2	1	1	1	1	1	1	1	1	2	2	1	1	1	1	1	2	2	2	1	1	2	2	1	2	2	2	2	2	1	2	1	2	1	2	1	2
PP398	European	2	2	1	2	1	1	1	2	2	2	1	1	1	1	1	1	2	2	1	2	2	2	1	1	1	1	1	2	2	2	1	2	1	2	1	1	1	1	1	2	2	2	2	2	1	2	1	2
PP403	European	1	2	1	2	1	2	1	1	1	2	2	2	1	1	1	1	2	2	1	2	1	2	1	2	1	1	1	2	1	2	1	1	2	2	1	1	2	2	1	2	1	2	2	2	1	1	1	2
PP412	European	2	2	1	2	1	1	1	1	2	2	1	2	2	2	1	2	2	2	1	2	1	2	1	2	1	1	2	2	1	2	1	2	2	2	1	1	1	2	1	1	2	2	2	2	1	1	2	2
PP414	European	1	1	1	2	1	2	1	2	2	2	1	2	1	2	2	2	2	2	1	2	2	2	1	1	1	1	1	1	1	2	2	2	2	2	1	2	1	2	1	2	1	2	1	2	1	1	1	1
PP416	European	2	2	1	1	1	1	1	1	2	2	2	2	1	1	2	2	1	1	2	2	1	2	1	1	1	1	1	1	2	2	1	2	2	2	1	1	2	2	2	2	1	1	1	2	2	2	1	2
PP417	European	1	2	1	1	1	2	1	1	1	2	2	2	1	1	2	2	1	2	1	1	2	2	1	2	1	1	2	2	2	2	2	2	2	2	1	2	2	2	2	2	1	2	2	2	1	1	1	2
PP418	European	1	2	1	2	1	2	1	1	2	2	2	2	1	1	1	1	2	2	1	2	1	2	1	1	1	1	1	1	2	2	1	1	2	2	1	1	2	2	2	2	2	2	1	2	1	1	1	2
PP424	European	1	2	1	1	1	2	1	1	2	2	2	2	2	2	2	2	2	2	1	2	1	2	1	1	1	1	2	2	1	2	1	2	1	2	1	2	2	2	1	2	1	2	2	2	1	2	2	2
PP426	European	1	2	1	2	1	2	1	1	1	2	2	2	1	2	1	2	1	2	1	2	1	2	1	1	1	2	2	2	1	2	1	1	2	2	1	1	2	2	2	2	1	1	1	2	1	2	1	1
PP427	European	2	2	1	1	1	2	1	2	2	2	1	2	1	1	1	2	2	2	1	1	1	2	1	1	1	2	2	2	1	2	1	2	1	1	1	1	1	2	1	2	1	2	2	2	1	1	1	2
PP428	European	1	2	2	2	2	2	1	1	2	2	2	2	1	1	2	2	1	2	1	1	2	2	1	2	1	1	2	2	2	2	1	1	2	2	1	1	2	2	2	2	1	1	2	2	1	1	1	2
PP430	European	1	2	1	2	2	2	1	1	2	2	1	1	1	1	2	2	1	2	1	2	1	2	1	1	1	2	1	2	2	2	1	1	2	2	1	2	1	1	2	2	2	2	2	2	1	1	2	2
PP431	European	1	2	1	2	1	1	1	1	2	2	2	2	1	1	1	2	2	2	1	1	1	1	1	1	1	1	1	2	2	2	1	2	1	2	1	1	1	2	1	1	2	2	2	2	1	2	1	2
PP435	European	2	2	1	1	1	2	1	2	2	2	1	2	1	2	2	2	2	2	1	2	1	2	1	1	1	1	1	2	1	2	1	2	1	2	1	1	1	2	2	2	1	2	1	1	1	1	1	2
PP439	European	1	1	1	1	1	2	1	1	1	2	2	2	1	1	1	2	1	2	2	2	2	2	1	1	1	2	2	2	1	2	1	1	1	2	1	1	2	2	2	2	1	1	2	2	1	2	1	2
PP440	European	2	2	1	1	1	2	1	1	2	2	2	2	1	1	1	2	2	2	1	1	2	2	1	2	1	1	2	2	1	2	1	1	2	2	1	1	2	2	2	2	1	2	2	2	1	1	1	2
PP441	European	1	2	1	2	1	2	1	2	2	2	2	2	1	2	1	2	1	2	1	1	2	2	1	1	1	1	1	2	1	2	1	1	2	2	1	1	2	2	1	2	1	1	1	2	1	1	2	2
PP442	European	1	2	1	2	1	1	1	1	2	2	1	2	1	1	1	2	2	2	1	1	1	2	1	1	1	2	1	2	2	2	1	2	1	2	1	1	1	2	1	2	1	1	1	2	1	1	1	2
PP444	European	1	1	1	1	1	2	1	1	2	2	1	2	1	1	2	2	1	2	1	1	1	1	1	1	1	1	1	2	2	2	1	1	1	2	1	1	1	2	2	2	1	1	2	2	1	1	1	2
PP448	European	1	2	1	2	1	1	1	1	1	2	1	2	1	2	2	2	2	2	1	2	1	2	1	1	1	1	2	2	2	2	1	1	2	2	1	1	1	2	2	2	1	2	1	2	1	1	1	2
PP449	European	2	2	1	2	1	1	1	2	2	2	2	2	1	2	1	2	2	2	1	1	2	2	1	2	1	2	1	2	2	2	1	2	2	2	1	1	2	2	2	2	2	2	2	2	1	2	2	2
PP472	European	1	2	2	2	2	2	1	2	0	0	2	2	1	2	2	2	2	2	1	2	2	2	1	2	1	2	2	2	1	2	1	1	2	2	1	2	2	2	2	2	1	2	1	2	1	1	1	2
PP477	European	2	2	1	2	1	1	1	1	2	2	2	2	1	1	1	2	2	2	2	2	2	2	1	1	1	1	1	2	2	2	1	2	2	2	1	2	2	2	2	2	1	2	1	2	1	1	1	2
PP478	European	2	2	1	1	1	1	1	2	1	2	2	2	1	1	2	2	2	2	1	2	1	1	1	1	1	1	1	2	1	2	1	2	1	2	1	1	2	2	2	2	1	2	2	2	1	1	1	2
PP480	European	2	2	1	2	1	1	2	2	2	2	1	2	1	1	2	2	2	2	2	2	1	2	1	1	1	1	2	2	1	1	1	2	2	2	1	2	1	2	1	2	2	2	2	2	1	1	1	2
PP488	European	1	2	1	1	2	2	1	1	1	2	2	2	1	1	2	2	2	2	1	1	1	1	1	2	1	1	1	2	1	2	1	1	1	2	2	2	2	2	1	2	1	2	1	2	1	2	1	1
PP497	European	2	2	2	2	1	2	1	1	2	2	1	2	1	1	2	2	1	2	1	1	1	2	2	2	1	2	2	2	1	2	1	2	2	2	1	1	1	2	1	1	2	2	1	1	1	1	1	1
PP498	European	2	2	1	1	1	2	1	2	1	2	1	2	1	1	2	2	2	2	1	2	2	2	1	2	1	2	2	2	1	2	1	1	2	2	1	2	1	2	1	2	1	2	2	2	1	2	1	1
PP502	European	2	2	1	2	1	1	1	2	2	2	1	2	1	1	1	2	1	2	1	2	2	2	1	1	1	2	1	2	1	2	1	1	2	2	1	2	1	2	1	2	1	1	1	2	1	2	1	2
PP506	European	2	2	1	2	2	2	1	1	2	2	2	2	1	1	1	2	2	2	1	1	2	2	1	1	1	1	2	2	1	2	1	1	1	2	2	2	2	2	2	2	1	1	2	2	1	1	1	2
PP507	European	2	2	1	1	1	2	1	1	1	2	2	2	1	1	1	2	2	2	1	2	1	2	1	2	1	1	2	2	1	2	1	1	2	2	1	2	2	2	2	2	1	2	2	2	1	1	1	2
PP509	European	1	2	1	2	1	2	1	2	1	2	1	2	1	1	1	1	2	2	1	1	1	2	1	1	1	1	2	2	2	2	1	1	2	2	1	2	1	2	2	2	1	1	2	2	1	1	1	2
PP514	European	1	2	1	1	1	2	1	1	1	2	1	2	1	1	1	1	1	1	1	2	2	2	1	1	1	1	1	2	1	2	1	2	2	2	2	2	1	2	2	2	1	2	1	2	1	1	1	1
PP515	European	2	2	1	2	1	2	1	1	2	2	2	2	1	1	1	2	1	2	2	2	1	2	1	1	1	2	1	2	1	2	1	1	1	2	1	1	2	2	2	2	1	2	2	2	1	2	1	1
PP516	European	1	2	2	2	1	2	1	1	2	2	2	2	1	2	1	2	1	2	1	2	1	2	1	1	1	2	2	2	1	2	1	2	2	2	1	2	2	2	2	2	1	1	1	1	1	1	2	2
PP517	European	2	2	2	2	2	2	1	1	2	2	2	2	1	1	1	2	1	2	2	2	1	2	1	1	1	2	2	2	1	2	1	1	1	2	1	1	2	2	2	2	1	2	2	2	1	1	1	2
PP518	European	1	2	1	1	1	2	1	1	1	2	2	2	1	1	1	1	2	2	1	2	2	2	1	1	1	1	1	2	2	2	1	2	1	2	1	1	2	2	2	2	1	2	1	2	1	1	1	2
PP536	European	2	2	1	1	1	1	1	2	2	2	2	2	0	0	1	2	2	2	1	1	2	2	1	1	1	1	2	2	1	2	1	1	1	2	1	1	2	2	1	1	1	2	2	2	1	1	1	2
PP538	European	1	1	1	1	2	2	1	1	2	2	2	2	1	1	2	2	2	2	1	2	1	2	1	1	1	1	2	2	2	2	1	2	2	2	1	2	2	2	2	2	1	1	1	2	1	1	1	1
PP540	European	2	2	1	1	1	2	1	1	2	2	1	2	1	1	2	2	2	2	1	2	2	2	1	1	1	2	1	2	2	2	1	1	2	2	1	1	1	2	2	2	1	2	2	2	1	1	1	2
PP541	European	2	2	1	1	1	1	1	1	2	2	1	2	1	1	2	2	1	2	1	1	1	2	1	1	1	1	2	2	1	2	2	2	2	2	1	2	1	2	1	2	1	2	1	2	1	1	1	2
PP553	European	1	2	1	1	1	2	1	2	2	2	2	2	1	2	1	2	2	2	1	2	2	2	1	1	1	1	2	2	1	2	1	1	2	2	1	1	2	2	2	2	1	1	1	2	1	2	1	2
PP559	European	1	2	1	1	1	2	1	1	1	2	2	2	1	1	1	1	2	2	1	1	2	2	1	2	1	1	1	2	1	2	1	1	1	2	1	2	2	2	2	2	1	1	1	2	1	2	2	2
PP562	European	1	2	1	1	2	2	1	2	2	2	1	2	1	2	1	2	2	2	1	2	2	2	1	2	1	1	1	2	1	2	1	1	2	2	1	2	1	2	1	2	1	2	0	0	1	1	1	2
PP564	European	1	2	1	1	2	2	1	1	2	2	2	2	1	1	2	2	1	2	1	1	1	1	1	1	1	1	1	2	2	2	1	1	1	2	2	2	2	2	2	2	1	2	1	2	1	1	1	2
PP567	European	1	2	1	1	1	2	1	2	2	2	2	2	1	2	2	2	2	2	1	1	1	1	1	2	1	1	1	2	1	1	1	2	2	2	1	1	2	2	1	2	1	2	1	2	1	1	1	1
PP573	European	2	2	1	1	1	2	1	1	1	2	1	1	1	1	1	1	1	2	1	1	1	2	1	1	1	2	1	2	2	2	1	1	2	2	1	1	1	1	2	2	1	2	1	1	1	1	1	1
PP577	European	1	2	2	2	1	1	1	1	2	2	1	1	1	2	1	2	2	2	1	1	2	2	1	1	1	1	2	2	2	2	1	1	2	2	1	2	1	1	2	2	2	2	2	2	1	2	1	2
PP579	European	2	2	1	2	2	2	1	1	2	2	1	2	1	1	2	2	2	2	1	1	2	2	1	1	1	1	2	2	2	2	1	2	2	2	1	1	1	2	2	2	1	2	1	2	1	2	1	1
PP580	European	2	2	1	1	1	2	1	1	1	2	1	1	1	2	2	2	2	2	1	1	2	2	1	2	1	1	2	2	1	2	1	2	2	2	1	1	1	2	2	2	1	2	1	2	1	2	1	1
PP585	European	1	2	1	1	1	2	1	2	1	2	2	2	1	2	1	2	2	2	1	2	1	2	1	2	1	1	1	2	1	2	1	1	2	2	1	1	2	2	2	2	1	2	1	2	1	1	1	2
PP591	European	1	1	1	1	2	2	1	2	2	2	1	2	1	1	2	2	2	2	2	2	1	2	1	2	1	2	2	2	2	2	1	1	2	2	1	1	1	2	2	2	2	2	1	2	1	1	1	1
PP609	European	1	2	1	2	1	2	1	1	2	2	1	2	1	1	1	2	2	2	1	2	2	2	1	1	1	1	1	2	2	2	1	2	2	2	1	1	1	2	2	2	1	2	2	2	2	2	1	2
PP619	European	1	1	1	1	1	1	1	1	2	2	1	2	1	2	1	2	2	2	1	2	2	2	1	1	1	2	1	2	1	2	1	1	2	2	1	2	1	2	2	2	1	2	1	1	1	2	1	1
PP620	European	2	2	1	2	1	2	1	1	2	2	1	2	1	1	1	2	2	2	1	2	2	2	1	1	1	2	2	2	2	2	1	1	2	2	1	1	1	2	2	2	1	2	2	2	1	1	1	1
PP621	European	2	2	1	1	1	2	1	1	2	2	1	2	1	1	2	2	2	2	1	1	2	2	1	1	1	1	1	2	2	2	1	1	1	2	1	2	1	2	2	2	1	1	1	2	1	1	1	1
PP627	European	1	2	1	2	1	1	1	1	1	2	2	2	1	1	2	2	2	2	1	1	2	2	1	1	1	2	2	2	2	2	1	1	2	2	1	1	2	2	1	2	1	2	2	2	1	2	1	1
PP628	European	1	1	1	2	2	2	1	1	2	2	1	1	1	1	2	2	1	2	1	2	1	2	1	2	1	1	1	2	2	2	1	1	1	2	1	2	1	1	1	2	1	2	2	2	1	1	1	2
PP629	European	2	2	1	1	2	2	1	1	1	2	2	2	1	2	1	2	1	2	1	1	1	2	1	1	1	1	1	2	2	2	1	1	2	2	1	1	1	2	2	2	1	1	2	2	1	1	1	1
PP638	European	1	2	1	2	1	2	1	1	1	2	1	2	1	1	1	2	1	2	1	2	2	2	1	1	1	1	1	2	1	2	1	1	2	2	2	2	1	2	1	2	1	1	1	2	1	2	1	2
PP641	European	2	2	1	1	1	2	1	1	2	2	2	2	1	1	1	2	2	2	1	2	1	2	1	1	1	1	1	2	2	2	1	2	2	2	1	1	2	2	2	2	1	2	1	2	1	1	1	2
PP643	European	2	2	1	2	1	2	1	1	2	2	1	2	1	1	1	2	1	2	1	1	2	2	1	2	1	2	1	2	2	2	1	1	2	2	1	2	1	2	2	2	1	2	2	2	1	1	1	1
PP646	European	2	2	1	2	1	2	1	1	1	2	2	2	2	2	1	2	1	2	1	2	2	2	1	1	1	1	1	2	1	1	1	1	2	2	2	2	2	2	1	1	1	2	1	1	1	1	1	2
PP647	European	2	2	1	2	1	2	1	1	2	2	2	2	1	2	1	2	1	2	1	2	1	2	1	1	1	1	1	2	1	2	1	2	1	2	1	1	2	2	1	2	1	2	2	2	1	1	1	1
PP651	European	1	2	1	1	1	2	1	1	1	2	2	2	1	1	1	2	2	2	1	2	2	2	1	2	1	1	2	2	2	2	1	1	2	2	1	1	2	2	1	2	1	2	2	2	1	1	1	2
PP653	European	1	2	2	2	1	2	1	1	2	2	1	2	1	2	2	2	1	1	1	2	2	2	1	2	1	1	2	2	1	2	1	1	2	2	1	2	1	2	2	2	2	2	1	2	1	1	1	2
PP654	European	1	2	1	2	1	1	1	1	1	2	2	2	1	2	1	2	1	2	1	1	2	2	1	1	1	1	1	1	2	2	1	2	2	2	1	1	2	2	2	2	2	2	2	2	1	1	1	2
PP658	European	2	2	1	1	1	2	1	2	1	2	1	2	1	1	1	1	2	2	1	1	2	2	1	1	1	2	2	2	2	2	1	1	2	2	1	1	1	2	1	2	1	1	2	2	1	1	1	1
PP659	European	2	2	1	1	2	2	1	1	1	2	2	2	1	1	2	2	2	2	1	1	1	2	1	2	1	1	2	2	1	2	1	1	1	2	1	1	1	2	2	2	2	2	1	2	1	2	1	2
PP666	European	1	2	2	2	1	2	1	1	1	2	1	2	1	1	1	2	2	2	1	1	1	2	1	1	1	1	1	1	1	2	1	2	2	2	1	1	1	2	1	2	1	2	1	1	1	1	1	1
PP669	European	1	2	1	2	1	1	1	1	2	2	1	2	1	2	1	2	2	2	1	1	1	2	1	1	1	1	1	1	2	2	1	1	0	0	1	1	2	2	2	2	1	2	2	2	1	1	1	2
PP671	European	1	2	1	2	1	2	1	1	2	2	2	2	1	1	2	2	2	2	2	2	2	2	1	2	1	1	1	2	2	2	1	1	2	2	1	2	2	2	2	2	1	1	2	2	1	1	1	2
PP673	European	1	2	1	2	1	1	1	1	2	2	2	2	1	1	1	2	1	2	1	1	1	2	1	1	2	2	2	2	2	2	1	2	2	2	1	1	2	2	2	2	1	1	1	2	1	1	1	1
PP676	European	1	2	1	1	2	2	1	1	2	2	2	2	1	1	1	1	2	2	1	1	1	2	1	1	1	1	2	2	2	2	1	2	2	2	1	2	2	2	2	2	1	2	2	2	1	1	2	2
PP677	European	2	2	2	2	2	2	1	1	1	2	2	2	2	2	1	2	1	2	1	2	2	2	1	1	1	1	2	2	1	1	1	1	2	2	1	1	2	2	1	2	1	2	1	2	1	1	1	2
PP684	European	1	2	1	2	2	2	1	1	2	2	2	2	1	1	1	2	1	2	1	2	1	2	1	1	1	2	2	2	2	2	1	1	2	2	1	2	2	2	2	2	2	2	2	2	1	1	1	2
PP692	European	2	2	1	1	2	2	1	1	2	2	2	2	1	2	1	2	2	2	1	1	1	2	1	1	1	2	2	2	1	1	1	1	2	2	1	1	2	2	2	2	2	2	1	1	1	1	1	2
PP693	European	1	2	1	1	2	2	1	2	2	2	2	2	1	1	1	1	2	2	1	2	2	2	1	1	1	2	1	2	1	2	2	2	2	2	1	1	1	2	1	1	1	2	2	2	1	2	2	2
PP694	European	1	2	1	2	1	2	1	2	1	2	2	2	1	1	1	2	2	2	2	2	1	2	1	2	1	1	2	2	2	2	1	1	2	2	2	2	2	2	2	2	1	2	1	2	1	1	1	2
PP697	European	2	2	1	2	1	2	1	1	2	2	2	2	1	1	1	2	2	2	1	2	2	2	2	2	1	1	2	2	2	2	1	2	2	2	1	2	2	2	2	2	1	2	1	1	1	2	1	2
PP699	European	2	2	2	2	2	2	1	1	1	2	2	2	1	2	2	2	2	2	1	2	1	2	1	1	1	1	2	2	2	2	1	1	1	2	1	1	2	2	1	2	1	2	2	2	1	2	2	2
PP709	European	1	2	1	1	1	2	1	1	1	2	2	2	1	1	1	2	1	2	2	2	1	2	1	1	1	2	1	2	1	2	1	1	2	2	1	2	2	2	1	2	1	1	1	2	1	2	1	2
PP714	European	1	2	1	2	2	2	1	1	1	2	1	2	1	1	1	2	2	2	1	2	1	2	1	1	1	2	2	2	2	2	1	1	2	2	1	1	1	2	1	2	1	2	2	2	1	1	1	2
PP715	European	2	2	1	1	1	2	1	1	2	2	2	2	1	2	1	2	1	2	1	2	1	1	1	1	1	1	1	1	1	2	1	1	2	2	1	2	2	2	2	2	1	1	1	2	1	1	1	2
PP716	European	1	2	1	2	1	1	1	2	1	2	1	2	1	1	1	2	1	2	1	2	2	2	1	1	2	2	1	1	1	2	1	1	2	2	2	2	1	2	2	2	1	2	2	2	1	2	1	2
PP718	European	1	2	1	1	1	2	1	1	1	2	2	2	1	1	1	2	2	2	1	2	2	2	1	1	1	1	2	2	2	2	1	1	2	2	1	2	2	2	1	2	1	2	1	2	1	2	1	1
PP724	European	1	2	1	1	1	2	1	2	2	2	1	2	1	2	2	2	2	2	2	2	1	2	1	1	1	1	1	2	1	2	1	1	1	1	1	2	1	1	2	2	1	1	1	2	1	1	2	2
PP733	European	1	2	1	1	2	2	1	1	2	2	2	2	1	1	2	2	2	2	1	2	1	2	1	1	1	1	2	2	2	2	1	1	2	2	1	2	2	2	1	2	1	1	2	2	1	1	1	1
PP734	European	1	2	1	2	1	1	1	1	1	2	2	2	1	1	1	1	2	2	1	1	1	2	1	1	1	1	1	2	2	2	1	1	2	2	1	2	2	2	1	2	1	2	1	2	1	1	1	2
PP737	European	2	2	1	2	1	2	1	1	1	2	2	2	1	2	2	2	2	2	1	1	2	2	1	1	1	1	1	2	2	2	1	2	2	2	1	1	2	2	1	2	2	2	1	1	2	2	2	2
PP741	European	1	2	1	1	1	1	1	1	2	2	1	2	1	1	2	2	2	2	1	2	1	2	1	1	1	1	2	2	1	2	1	1	2	2	1	1	1	2	2	2	1	1	2	2	1	1	1	1
PP742	European	1	2	1	1	2	2	1	1	1	2	2	2	1	1	1	2	2	2	1	2	1	2	1	1	1	1	2	2	2	2	2	2	2	2	1	1	2	2	2	2	1	2	1	1	1	1	1	2
PP754	European	1	2	1	1	1	1	1	1	2	2	2	2	1	1	1	2	2	2	1	2	1	2	1	1	1	1	1	1	2	2	1	1	2	2	1	1	2	2	1	2	1	2	1	2	1	1	1	2
PP755	European	2	2	1	1	1	2	1	1	2	2	2	2	1	1	1	2	2	2	1	1	2	2	1	1	1	2	1	1	1	2	1	2	1	2	1	2	2	2	2	2	1	2	2	2	1	2	2	2
PP760	European	2	2	1	1	1	1	1	1	1	2	1	2	1	1	1	1	1	2	1	1	1	1	1	1	1	1	2	2	1	1	1	2	1	2	1	1	1	2	2	2	2	2	2	2	1	1	1	2
PP764	European	1	1	1	2	1	1	1	1	2	2	2	2	1	1	1	1	2	2	1	2	1	2	1	2	1	1	1	2	2	2	1	2	2	2	1	1	1	2	1	2	1	2	1	1	2	2	1	2
PP765	European	2	2	1	2	1	2	1	2	1	2	1	2	1	1	2	2	1	1	1	1	2	2	1	2	1	1	1	2	2	2	1	1	2	2	1	2	1	2	1	2	1	2	2	2	1	1	1	1
PP768	European	2	2	2	2	1	1	1	1	2	2	2	2	1	1	1	1	1	1	1	1	2	2	1	1	1	1	1	2	1	2	1	1	2	2	1	2	2	2	1	2	1	2	2	2	1	1	1	1
PP781	European	1	2	1	1	2	2	1	1	2	2	2	2	1	1	1	2	2	2	1	2	2	2	1	1	1	2	2	2	2	2	1	2	2	2	1	2	2	2	1	2	1	2	2	2	1	1	1	1
PP788	European	1	2	1	2	1	1	1	2	2	2	2	2	1	1	2	2	2	2	1	2	1	2	1	1	1	1	1	2	2	2	1	2	2	2	1	2	2	2	2	2	1	2	1	1	1	1	2	2
PP793	European	2	2	1	2	1	2	1	2	1	2	1	2	1	2	1	2	2	2	1	2	1	2	1	2	1	1	2	2	2	2	1	1	2	2	1	2	1	2	2	2	1	1	1	2	1	2	2	2
PP808	European	1	2	1	1	1	2	1	2	2	2	1	2	1	1	2	2	2	2	2	2	2	2	2	2	1	1	1	2	1	2	1	2	1	2	1	1	1	2	2	2	1	2	1	2	1	1	2	2
PP811	European	2	2	1	2	1	1	1	1	2	2	2	2	2	2	1	2	1	2	2	2	2	2	1	1	1	2	2	2	1	2	1	2	2	2	1	1	2	2	2	2	1	1	1	2	1	1	1	2
PP816	European	1	2	1	2	1	2	1	1	1	2	2	2	1	2	2	2	1	2	1	1	1	1	1	1	1	1	2	2	2	2	1	1	2	2	1	1	2	2	1	2	1	1	1	2	1	1	1	2
PP818	European	1	2	1	1	1	1	2	2	2	2	1	2	1	1	2	2	2	2	1	2	2	2	1	1	1	1	1	2	2	2	1	1	1	1	1	1	1	2	2	2	1	2	2	2	1	1	1	1
PP819	European	2	2	1	1	1	2	1	1	2	2	2	2	1	1	2	2	2	2	1	1	1	2	1	1	1	1	2	2	1	2	1	2	2	2	1	2	2	2	2	2	1	2	1	2	1	1	1	2
PP822	European	2	2	2	2	2	2	1	1	1	2	2	2	1	1	1	2	2	2	1	1	1	2	1	1	1	2	2	2	1	2	1	2	1	2	2	2	2	2	1	2	1	2	2	2	1	1	1	1
PP824	European	1	1	1	2	1	2	1	1	2	2	2	2	1	1	2	2	2	2	1	2	1	2	1	2	1	2	1	2	2	2	1	1	2	2	1	1	2	2	2	2	1	1	1	2	1	2	1	1
PP825	European	2	2	1	1	1	2	1	2	1	2	2	2	1	2	2	2	2	2	1	1	1	2	1	1	1	1	1	2	1	2	1	1	2	2	1	1	2	2	1	2	1	2	2	2	1	1	1	2
PP828	European	1	2	1	2	1	2	1	2	2	2	2	2	2	2	1	2	1	2	1	2	1	2	1	1	1	1	1	2	2	2	1	2	2	2	1	2	2	2	2	2	1	2	2	2	1	1	1	2
PP834	European	1	1	1	2	1	1	1	1	2	2	1	2	1	1	1	2	1	2	2	2	2	2	1	2	1	2	2	2	2	2	1	1	2	2	2	2	1	2	2	2	1	2	2	2	1	1	1	2
PP835	European	2	2	1	1	1	2	1	2	1	2	2	2	1	1	1	2	2	2	1	2	1	2	1	1	1	1	1	2	2	2	1	1	2	2	1	1	2	2	2	2	1	1	2	2	1	1	1	2
PP837	European	2	2	1	2	1	1	1	2	2	2	1	2	1	1	2	2	2	2	1	2	1	2	2	2	1	1	2	2	2	2	1	2	1	2	1	2	1	2	2	2	1	2	1	2	1	1	1	2
PP839	European	2	2	1	1	1	2	1	1	2	2	2	2	1	1	1	1	1	2	1	2	2	2	1	1	1	1	2	2	2	2	1	2	2	2	1	1	2	2	2	2	2	2	1	2	1	1	2	2
PP841	European	1	2	1	2	1	2	1	1	1	2	2	2	1	1	1	2	2	2	1	1	1	2	1	1	1	2	1	2	2	2	1	1	1	2	1	1	2	2	1	2	1	2	1	2	1	2	1	2
PP842	European	1	1	1	2	1	1	1	1	2	2	1	2	1	1	1	2	1	2	2	2	2	2	1	2	1	2	2	2	2	2	1	1	2	2	2	2	1	2	2	2	1	2	2	2	1	1	1	2
PP859	European	2	2	1	2	2	2	1	1	1	2	2	2	1	1	1	2	2	2	1	1	1	2	1	1	1	2	1	1	2	2	1	1	2	2	1	2	2	2	2	2	1	2	1	2	1	1	1	2
PP866	European	1	2	1	2	1	2	1	1	2	2	2	2	1	2	2	2	1	2	1	1	2	2	1	1	1	1	2	2	2	2	1	2	1	2	1	2	2	2	1	2	2	2	2	2	1	1	1	1
PP868	European	1	2	1	1	1	2	1	1	1	2	2	2	1	1	1	2	2	2	1	1	2	2	1	1	1	2	1	2	1	2	1	2	1	2	1	2	2	2	2	2	2	2	1	2	1	1	2	2
PP881	European	1	2	1	2	1	1	1	1	1	1	1	2	1	2	1	1	2	2	1	1	2	2	1	1	1	2	1	2	2	2	1	2	2	2	1	1	1	2	1	2	1	1	2	2	1	1	1	2
PP882	European	1	2	1	1	2	2	1	2	2	2	2	2	1	1	1	2	1	2	1	1	2	2	1	1	1	2	2	2	2	2	1	1	1	2	1	1	2	2	2	2	2	2	2	2	1	1	1	2
PP886	European	2	2	1	2	1	1	1	2	2	2	1	2	1	1	2	2	2	2	1	2	1	2	2	2	1	1	2	2	2	2	1	2	1	2	1	2	1	2	2	2	1	2	1	2	1	1	1	2
PP887	European	2	2	1	1	1	2	1	1	2	2	2	2	1	1	1	1	1	2	1	2	2	2	1	1	1	1	2	2	2	2	1	2	2	2	1	1	2	2	2	2	2	2	1	2	1	1	2	2
PP888	European	1	1	1	1	2	2	1	1	1	2	1	2	2	2	2	2	2	2	1	1	2	2	1	2	1	2	1	1	2	2	1	1	2	2	1	2	1	2	2	2	1	2	1	2	1	2	1	2
PP890	European	1	2	1	2	1	2	2	2	2	2	1	2	1	1	1	2	2	2	1	1	1	2	1	1	1	2	2	2	2	2	1	2	2	2	1	1	1	2	1	1	2	2	2	2	1	1	1	2
PP892	European	1	1	1	2	1	2	1	2	2	2	1	2	1	1	1	1	2	2	2	2	2	2	1	1	1	1	1	1	2	2	1	1	1	2	1	1	1	2	2	2	1	1	1	2	1	2	1	1
PP893	European	1	1	1	1	1	2	1	2	2	2	1	2	1	1	1	2	2	2	1	2	1	2	1	1	1	2	2	2	2	2	1	1	1	1	1	2	1	1	1	2	1	2	2	2	1	1	1	1
PP894	European	1	1	1	2	1	2	1	1	1	2	2	2	1	1	1	1	2	2	1	2	2	2	1	1	1	1	2	2	2	2	1	1	1	2	1	2	2	2	2	2	1	2	1	2	1	1	2	2
PP916	European	2	2	2	2	1	1	1	1	1	2	2	2	1	1	2	2	2	2	1	1	1	1	1	1	1	2	1	2	1	2	1	1	1	1	1	1	1	2	2	2	1	2	2	2	1	1	1	1
PP918	European	2	2	1	2	1	2	1	2	2	2	1	2	1	2	1	2	2	2	1	2	1	2	1	2	1	2	2	2	1	2	1	1	1	2	1	2	1	2	1	2	1	2	1	2	1	1	1	2
PP922	European	2	2	1	2	1	2	1	1	2	2	2	2	1	2	1	2	2	2	1	1	1	2	1	1	1	1	1	2	2	2	1	2	2	2	1	2	2	2	2	2	2	2	1	2	1	1	1	1
PP999	European	2	2	1	1	2	2	2	2	1	2	1	2	1	1	1	2	2	2	1	2	1	2	1	1	1	2	2	2	1	1	1	2	2	2	1	2	1	2	2	2	1	2	2	2	2	2	1	1
P100	European	1	2	1	1	1	2	1	2	1	2	1	2	1	1	2	2	1	2	1	1	2	2	1	2	1	1	1	2	1	2	2	2	1	2	1	2	1	2	1	2	1	1	1	2	1	2	1	2
P102	European	1	2	1	1	2	2	1	1	1	2	2	2	1	1	2	2	1	2	2	2	2	2	1	1	1	1	2	2	1	2	1	1	2	2	1	1	2	2	2	2	1	1	2	2	1	1	1	2
P103	European	2	2	2	2	2	2	1	1	2	2	2	2	1	2	2	2	2	2	1	1	1	2	1	2	1	2	2	2	2	2	1	2	1	2	1	1	2	2	2	2	1	1	1	1	1	1	1	1
P104	European	2	2	1	1	1	1	1	2	2	2	2	2	1	1	1	2	1	1	1	2	1	1	1	1	1	1	1	2	2	2	1	1	2	2	1	1	2	2	1	2	1	2	2	2	1	1	1	2
P105	European	2	2	1	2	1	2	1	1	1	2	2	2	1	1	2	2	1	2	1	2	1	2	1	1	1	2	1	2	1	1	1	1	2	2	1	2	2	2	1	1	2	2	1	1	1	1	1	2
P107	European	1	1	1	1	1	2	1	1	1	2	1	2	1	1	2	2	2	2	1	1	2	2	1	1	1	1	2	2	2	2	1	1	2	2	1	1	1	2	1	2	1	1	1	1	1	1	1	1
P108	European	1	1	1	1	1	1	1	1	2	2	2	2	1	1	2	2	2	2	1	2	1	2	1	1	1	1	1	2	1	2	1	1	1	2	2	2	2	2	2	2	2	2	1	2	1	1	1	1
P111	European	1	2	1	1	1	1	1	1	2	2	2	2	1	1	1	2	2	2	1	2	1	2	1	1	1	2	1	2	2	2	1	2	1	2	1	2	2	2	2	2	1	2	1	2	1	1	1	2
P27	European	1	2	1	2	1	2	1	1	2	2	2	2	1	1	1	2	1	2	1	1	1	2	1	1	1	1	2	2	2	2	1	2	1	2	1	2	2	2	2	2	1	1	1	2	1	2	1	1
P28	European	2	2	1	2	1	1	1	1	1	2	2	2	1	1	1	1	2	2	1	1	1	2	1	2	1	1	1	2	2	2	1	2	1	2	1	1	1	2	2	2	2	2	2	2	1	1	1	2
P31	European	2	2	1	1	1	1	1	1	2	2	2	2	1	2	2	2	2	2	1	1	1	2	1	1	1	1	1	2	1	2	1	1	1	2	1	1	2	2	2	2	1	1	2	2	1	1	1	1
P32	European	1	2	2	2	1	1	1	1	1	2	1	2	1	1	2	2	1	1	1	1	2	2	1	1	1	1	1	2	2	2	1	2	1	2	1	2	1	2	1	2	1	2	2	2	1	1	1	1
P41	European	2	2	1	2	1	1	1	1	1	2	2	2	1	1	1	1	2	2	1	2	2	2	1	1	1	1	1	1	2	2	1	1	2	2	1	1	2	2	2	2	1	1	1	2	1	1	1	1
P43	European	1	2	1	2	2	2	1	1	2	2	2	2	1	2	2	2	1	2	1	1	1	1	1	2	1	1	1	2	1	2	2	2	1	2	1	1	2	2	2	2	1	2	2	2	1	1	1	1
P48	European	1	2	1	1	1	2	1	1	1	2	2	2	1	2	1	2	1	1	1	1	2	2	1	2	1	2	1	1	1	2	1	1	1	2	1	2	2	2	2	2	2	2	2	2	2	2	1	2
P57	European	1	1	1	1	1	1	2	2	2	2	2	2	1	1	2	2	2	2	1	2	2	2	1	1	1	2	2	2	2	2	1	1	1	1	1	1	1	1	2	2	1	1	2	2	1	1	1	2
P60	European	2	2	1	2	1	1	1	1	1	1	2	2	1	1	1	2	1	2	1	1	1	1	1	2	1	1	1	2	2	2	1	1	2	2	1	1	2	2	1	2	1	1	1	1	1	1	1	1
P64	European	1	2	1	1	1	1	1	2	2	2	1	2	1	2	1	2	2	2	1	2	1	2	1	1	1	1	2	2	1	2	1	2	2	2	1	1	1	2	1	2	2	2	1	2	1	1	1	2
P68	European	1	1	1	1	1	1	2	2	2	2	2	2	1	1	1	2	2	2	1	2	2	2	1	1	1	2	2	2	2	2	1	1	1	2	1	1	2	2	2	2	1	2	1	2	1	1	1	1
P69	European	1	2	1	2	2	2	1	1	2	2	1	2	1	1	2	2	2	2	1	2	1	2	1	1	1	2	2	2	2	2	1	1	2	2	1	1	1	2	1	2	1	2	1	2	1	1	1	2
P73	European	1	2	1	1	1	2	1	1	1	2	2	2	2	2	1	2	2	2	1	2	2	2	1	1	2	2	2	2	2	2	1	2	2	2	1	2	2	2	1	2	1	2	2	2	1	1	2	2
P80	European	2	2	1	2	1	2	1	1	1	1	2	2	1	1	1	2	2	2	1	1	1	1	1	2	2	2	1	2	1	2	1	1	2	2	1	2	2	2	1	2	1	1	1	2	1	1	2	2
P82	European	1	1	1	1	1	2	1	1	1	2	1	1	1	2	1	2	1	2	1	1	1	2	1	1	1	2	1	2	2	2	1	1	2	2	1	1	2	2	2	2	1	1	1	1	1	1	1	1
P85	European	1	2	1	1	1	1	1	1	2	2	1	2	1	1	2	2	1	2	1	2	1	2	1	1	1	1	2	2	2	2	1	2	1	1	1	2	1	2	2	2	2	2	1	1	1	1	1	2
P86	European	2	2	1	1	2	2	1	1	1	2	2	2	1	1	1	2	2	2	1	2	1	1	1	1	1	2	2	2	1	1	1	1	2	2	1	1	2	2	2	2	1	2	1	2	1	1	1	2
P87	European	2	2	1	1	1	2	1	1	2	2	1	2	1	2	1	2	2	2	1	1	1	2	1	1	1	2	1	2	1	2	1	1	2	2	1	1	1	2	1	2	1	1	2	2	1	1	1	1
P92	European	1	1	1	2	2	2	1	1	1	2	1	2	1	1	2	2	2	2	1	2	2	2	1	1	1	1	2	2	2	2	1	1	2	2	1	2	1	2	2	2	1	2	1	1	1	1	1	1
P94	European	1	1	1	1	2	2	1	1	2	2	2	2	1	1	1	2	1	2	1	1	1	2	1	1	1	1	1	2	2	2	1	2	2	2	1	2	1	2	2	2	1	2	1	2	1	2	1	2
P96	European	2	2	1	1	1	2	1	2	2	2	2	2	1	1	1	2	1	2	1	2	2	2	1	1	1	1	1	2	2	2	1	1	2	2	2	2	2	2	2	2	1	2	1	2	1	1	1	2
P97	European	2	2	1	1	1	2	1	1	2	2	2	2	1	1	2	2	1	2	1	2	2	2	1	1	1	1	1	1	1	2	1	1	2	2	1	1	2	2	2	2	1	2	1	2	1	1	1	2
P98	European	1	2	1	2	1	2	1	1	2	2	2	2	1	1	1	1	1	2	1	1	2	2	1	1	1	1	1	2	1	1	1	1	2	2	1	1	2	2	1	2	1	1	1	2	1	1	1	1
P99	European	1	1	1	2	1	1	1	1	2	2	1	2	1	2	1	2	2	2	1	1	2	2	1	1	1	2	2	2	1	2	1	2	2	2	2	2	1	2	1	2	1	1	1	2	1	1	1	2
LE10	European	2	2	1	2	2	2	1	1	2	2	2	2	1	2	2	2	1	2	1	2	2	2	1	1	2	2	2	2	2	2	1	2	2	2	1	1	2	2	1	2	1	1	2	2	1	1	2	2
LE12	European	1	2	1	2	2	2	1	1	2	2	2	2	1	1	2	2	2	2	1	2	2	2	1	1	1	2	2	2	2	2	1	2	2	2	1	1	2	2	1	1	1	1	2	2	1	1	1	1
LE13	European	1	2	1	2	1	1	1	1	2	2	2	2	1	2	1	2	2	2	2	2	2	2	1	1	1	1	1	2	2	2	1	1	2	2	1	2	1	2	2	2	2	2	1	2	1	1	0	0
LE88	European	1	2	1	2	1	2	1	1	1	2	2	2	1	1	1	1	2	2	1	2	1	2	1	1	1	2	2	2	2	2	1	1	1	1	1	1	2	2	2	2	1	1	1	2	1	1	0	0
LE9	European	1	2	1	1	1	1	1	1	1	2	2	2	1	1	2	2	1	1	2	2	2	2	1	1	1	1	2	2	2	2	1	1	2	2	1	2	2	2	2	2	1	1	2	2	1	1	0	0
LE90	European	1	1	1	2	1	2	1	1	1	2	2	2	1	2	1	1	2	2	1	2	2	2	1	2	2	2	1	2	2	2	1	1	1	2	2	2	2	2	2	2	1	1	2	2	1	1	1	1
LE91	European	1	2	1	1	1	2	1	2	2	2	1	1	1	1	1	2	1	2	1	2	2	2	1	2	1	1	1	1	1	2	1	1	2	2	1	1	1	2	1	2	1	1	2	2	1	2	1	1
LE95	European	2	2	1	2	1	2	1	2	1	2	1	1	1	1	1	1	1	1	2	2	2	2	1	1	1	1	1	1	1	1	1	1	2	2	1	2	1	1	1	2	1	2	2	2	1	1	1	1
AWA003	Native American	2	2	1	1	2	2	2	2	1	1	2	2	2	2	1	1	2	2	2	2	2	2	2	2	1	2	1	1	1	1	1	2	1	1	1	1	2	2	1	1	2	2	1	2	1	1	1	1
AWA005	Native American	2	2	1	1	2	2	2	2	1	1	2	2	2	2	1	1	2	2	2	2	2	2	2	2	2	2	1	1	1	1	2	2	1	1	1	1	2	2	1	1	2	2	2	2	1	1	1	1
AWA006	Native American	2	2	1	1	2	2	2	2	1	1	2	2	2	2	1	1	2	2	2	2	2	2	2	2	2	2	1	1	1	1	1	2	1	1	1	1	2	2	1	1	2	2	2	2	1	1	1	1
AWA013	Native American	2	2	1	1	2	2	1	1	1	1	2	2	2	2	1	1	2	2	2	2	2	2	2	2	1	2	1	1	1	1	1	1	1	1	1	1	2	2	1	1	2	2	1	2	1	1	1	2
AWA019	Native American	2	2	1	1	2	2	1	2	1	1	2	2	2	2	1	1	2	2	2	2	2	2	2	2	1	2	2	2	1	1	1	2	1	1	1	1	2	2	1	1	1	1	2	2	1	1	1	1
AWA020	Native American	2	2	1	1	2	2	2	2	1	1	2	2	2	2	1	1	2	2	2	2	2	2	1	2	1	2	1	2	1	1	1	2	1	1	1	1	2	2	1	1	2	2	2	2	1	1	1	2
AWA024	Native American	2	2	1	1	2	2	2	2	1	1	2	2	2	2	1	1	2	2	2	2	2	2	2	2	1	2	1	1	1	1	1	1	1	1	1	1	2	2	1	1	2	2	1	1	1	1	1	2
AWA025	Native American	2	2	1	1	2	2	2	2	1	1	2	2	2	2	1	1	2	2	2	2	1	2	1	2	2	2	1	1	1	1	1	1	1	1	1	1	2	2	1	1	2	2	1	2	1	1	1	1
AWA026	Native American	2	2	1	1	2	2	1	2	1	1	2	2	2	2	1	1	2	2	2	2	2	2	2	2	2	2	1	2	1	1	1	2	1	1	1	1	2	2	1	1	2	2	2	2	1	1	1	1
AWA030	Native American	2	2	1	1	2	2	1	2	1	1	2	2	2	2	1	1	2	2	2	2	2	2	2	2	2	2	1	1	1	1	1	1	1	1	1	1	2	2	1	1	2	2	2	2	1	2	1	2
AWA031	Native American	2	2	1	1	2	2	2	2	1	1	2	2	2	2	1	1	2	2	2	2	2	2	2	2	2	2	1	1	1	1	1	1	1	1	1	1	2	2	1	1	2	2	2	2	1	1	1	1
AWA035	Native American	2	2	1	1	2	2	1	2	1	1	2	2	2	2	1	1	2	2	2	2	2	2	2	2	1	2	1	2	1	1	2	2	1	1	1	1	2	2	1	1	2	2	2	2	1	1	1	2
AWA036	Native American	2	2	1	1	2	2	1	2	1	1	2	2	2	2	1	1	2	2	2	2	2	2	2	2	1	2	1	1	1	1	1	1	1	1	1	1	2	2	1	1	2	2	1	2	1	1	1	2
AWA037	Native American	2	2	1	1	2	2	1	1	1	1	2	2	2	2	1	1	2	2	2	2	2	2	2	2	2	2	1	2	1	1	1	2	1	1	1	1	2	2	1	1	2	2	2	2	1	1	1	1
AWA038	Native American	2	2	1	1	2	2	1	2	1	1	2	2	2	2	1	1	2	2	2	2	2	2	2	2	1	2	2	2	1	1	1	2	1	1	1	1	2	2	1	1	2	2	1	2	1	1	1	2
AWA040	Native American	2	2	1	1	2	2	2	2	1	1	2	2	2	2	1	1	2	2	2	2	2	2	2	2	1	2	1	2	1	1	1	2	1	1	1	1	2	2	1	1	1	1	2	2	1	1	1	2
AWA042	Native American	2	2	1	1	2	2	1	2	1	1	2	2	2	2	1	1	2	2	2	2	2	2	2	2	1	2	1	2	1	1	1	1	1	1	1	1	2	2	1	1	2	2	2	2	1	1	1	2
AWA043	Native American	2	2	1	1	2	2	2	2	1	1	2	2	2	2	1	1	2	2	2	2	2	2	1	2	1	2	1	2	1	1	1	1	1	1	1	1	2	2	1	1	1	1	2	2	1	1	1	2
AWA045	Native American	2	2	1	1	2	2	2	2	1	1	2	2	2	2	1	1	2	2	2	2	1	2	1	2	2	2	1	1	1	1	1	2	1	1	1	1	2	2	1	1	2	2	2	2	1	1	1	1
AWA046	Native American	2	2	1	1	2	2	1	1	1	1	2	2	2	2	1	1	2	2	2	2	2	2	2	2	2	2	1	2	1	1	1	2	1	1	1	1	2	2	1	1	2	2	1	2	1	2	1	2
AWA049	Native American	2	2	1	1	2	2	1	2	1	1	2	2	2	2	1	1	2	2	2	2	2	2	1	1	2	2	1	2	1	1	2	2	1	1	1	1	2	2	1	1	2	2	2	2	1	1	1	1
AWA050	Native American	2	2	1	1	2	2	1	2	1	1	2	2	2	2	1	1	2	2	2	2	2	2	1	1	2	2	1	1	1	1	1	1	1	1	1	1	2	2	1	1	2	2	2	2	1	2	1	2
AWA052	Native American	2	2	1	1	2	2	1	1	1	1	2	2	2	2	1	1	2	2	2	2	2	2	1	1	1	2	1	2	1	1	1	1	1	1	1	1	2	2	1	1	2	2	2	2	1	2	1	2
AWA053	Native American	2	2	1	1	2	2	1	1	1	1	2	2	2	2	1	1	2	2	2	2	2	2	1	1	1	2	1	2	1	1	1	1	1	1	1	1	2	2	1	1	2	2	1	2	1	1	1	1
AWA056	Native American	2	2	1	1	2	2	2	2	1	1	2	2	2	2	1	1	2	2	2	2	1	2	1	2	2	2	1	1	1	1	1	1	1	1	1	1	2	2	1	1	2	2	1	2	1	1	1	1
AWA059	Native American	2	2	1	1	2	2	1	2	1	1	2	2	2	2	1	1	2	2	2	2	2	2	1	1	1	2	2	2	1	1	1	1	1	1	1	1	2	2	1	1	2	2	1	2	1	1	1	1
AWA063	Native American	2	2	1	1	2	2	1	2	1	1	2	2	2	2	1	1	2	2	2	2	2	2	1	1	2	2	1	2	1	1	1	2	1	1	1	1	2	2	1	1	2	2	2	2	1	1	1	1
AWA064	Native American	2	2	1	1	2	2	1	1	1	1	2	2	2	2	1	1	2	2	2	2	2	2	1	1	1	2	1	2	1	1	1	2	1	1	1	1	2	2	1	1	2	2	2	2	1	1	1	2
AWA073	Native American	2	2	1	1	2	2	1	2	1	1	2	2	2	2	1	1	2	2	2	2	2	2	1	1	2	2	1	2	1	1	1	2	1	1	1	1	2	2	1	1	2	2	2	2	1	1	1	1
AWA081	Native American	2	2	1	1	2	2	1	1	1	1	2	2	2	2	1	1	2	2	2	2	2	2	2	2	1	2	1	2	1	1	1	1	1	1	1	1	2	2	1	1	1	1	1	2	1	1	1	2
AWA084	Native American	2	2	1	1	2	2	1	1	1	1	2	2	2	2	1	1	2	2	2	2	2	2	2	2	1	2	1	2	1	1	1	1	1	1	1	1	2	2	1	1	2	2	1	2	1	1	1	2
AWA087	Native American	2	2	1	1	2	2	2	2	1	1	2	2	2	2	1	1	2	2	2	2	2	2	2	2	2	2	1	1	1	1	1	2	1	1	1	1	2	2	1	1	2	2	2	2	1	1	1	1
AWG001	Native American	2	2	1	1	2	2	2	2	1	1	2	2	2	2	1	1	2	2	2	2	2	2	1	1	2	2	1	1	1	1	1	2	1	1	1	1	2	2	1	1	2	2	2	2	1	1	1	1
AWG004	Native American	2	2	1	1	2	2	2	2	1	1	2	2	2	2	1	1	2	2	2	2	2	2	1	1	2	2	1	1	1	1	1	2	1	1	1	1	2	2	1	1	2	2	2	2	1	1	1	1
AWG005	Native American	2	2	1	1	2	2	1	2	1	1	2	2	2	2	1	1	1	2	2	2	2	2	1	1	1	2	1	1	1	1	1	1	1	1	1	1	2	2	1	1	2	2	2	2	1	1	1	1
AWG006	Native American	2	2	1	1	2	2	1	2	1	1	2	2	2	2	1	1	1	2	2	2	2	2	1	1	2	2	1	1	1	1	2	2	1	1	1	1	2	2	1	1	2	2	1	2	1	1	1	1
AWG008	Native American	2	2	1	1	2	2	1	2	1	1	2	2	2	2	1	1	1	2	2	2	2	2	1	1	2	2	1	1	1	1	1	2	1	1	1	1	2	2	1	1	2	2	1	2	1	1	1	1
AWG013	Native American	2	2	1	1	2	2	1	2	1	1	2	2	2	2	1	1	2	2	2	2	2	2	1	1	2	2	2	2	1	1	1	1	1	1	1	1	2	2	1	1	2	2	1	2	1	1	1	1
AWG019	Native American	2	2	1	1	2	2	1	2	1	1	2	2	2	2	1	1	2	2	2	2	2	2	1	1	2	2	1	1	1	1	1	1	1	1	1	1	2	2	1	1	2	2	1	2	1	1	1	1
AWG024	Native American	2	2	1	1	2	2	1	2	1	1	2	2	2	2	1	1	2	2	2	2	2	2	1	2	2	2	1	2	1	1	1	2	1	1	1	1	2	2	1	1	2	2	2	2	1	1	2	2
AWG029	Native American	2	2	1	1	2	2	2	2	1	1	2	2	2	2	1	1	1	2	2	2	2	2	1	1	1	2	1	1	1	1	1	1	1	1	1	1	2	2	1	1	2	2	1	2	1	1	1	2
AWG030	Native American	2	2	1	1	2	2	1	2	1	1	2	2	2	2	1	1	2	2	2	2	2	2	1	1	1	2	1	1	1	1	1	2	1	1	1	1	2	2	1	1	2	2	2	2	1	1	1	2
AWG031	Native American	2	2	1	1	2	2	2	2	1	1	2	2	2	2	1	1	2	2	2	2	2	2	1	1	2	2	1	2	1	1	1	2	1	1	1	1	2	2	1	1	2	2	1	1	1	1	1	1
AWG033	Native American	2	2	1	1	2	2	1	1	1	1	2	2	2	2	1	1	1	2	2	2	2	2	1	1	1	2	1	2	1	1	1	1	1	1	1	1	2	2	1	1	2	2	2	2	1	1	1	2
AWG038	Native American	2	2	1	1	2	2	1	2	1	1	2	2	2	2	1	1	2	2	2	2	2	2	1	1	1	2	1	2	1	1	1	1	1	1	1	1	2	2	1	1	2	2	2	2	1	1	1	2
KAA017	Native American	2	2	1	1	2	2	1	2	1	2	2	2	2	2	1	2	2	2	2	2	1	2	2	2	1	2	1	1	1	1	1	1	1	1	1	1	2	2	1	1	2	2	1	2	1	1	1	2
KAA020	Native American	2	2	1	1	2	2	1	2	1	1	2	2	2	2	1	1	2	2	2	2	1	2	1	1	1	2	1	2	1	1	1	1	1	1	1	1	2	2	1	1	2	2	1	2	1	1	1	2
KAA026	Native American	2	2	1	1	2	2	2	2	1	1	2	2	2	2	1	1	2	2	2	2	2	2	1	1	1	2	1	2	1	1	1	2	1	1	1	1	2	2	1	1	2	2	1	1	1	1	1	1
KAA028	Native American	2	2	1	1	2	2	1	1	1	1	2	2	2	2	1	1	1	2	2	2	2	2	1	2	1	1	1	2	1	1	1	1	1	1	1	1	2	2	1	1	2	2	1	1	1	1	2	2
KAA033	Native American	2	2	1	1	2	2	1	2	1	1	2	2	2	2	1	1	2	2	2	2	2	2	1	2	2	2	1	2	1	1	1	2	1	1	1	1	2	2	1	1	2	2	1	2	1	1	1	2
KAA037	Native American	2	2	1	1	2	2	1	2	1	1	2	2	2	2	1	1	2	2	2	2	1	2	1	1	1	2	1	2	1	1	1	2	1	1	1	1	2	2	1	1	2	2	1	1	1	2	1	1
KAA041	Native American	2	2	1	1	2	2	2	2	1	1	2	2	2	2	1	1	2	2	2	2	2	2	2	2	1	2	2	2	1	1	1	1	1	1	1	1	2	2	1	1	2	2	1	2	1	1	1	1
KAA057	Native American	2	2	1	1	2	2	1	1	1	1	2	2	2	2	1	1	2	2	2	2	2	2	1	1	1	2	1	2	1	1	1	1	1	1	1	1	2	2	1	1	2	2	2	2	1	1	1	1
PRK005	Native American	2	2	1	1	2	2	1	1	1	2	2	2	2	2	1	1	2	2	2	2	1	2	2	2	2	2	1	1	1	1	1	1	1	1	1	1	2	2	1	1	2	2	2	2	1	1	1	1
PRK006	Native American	2	2	1	1	2	2	1	2	1	2	2	2	2	2	1	1	2	2	2	2	2	2	1	2	2	2	1	1	1	1	1	2	1	1	1	1	2	2	1	1	2	2	2	2	1	2	1	2
PRK007	Native American	2	2	1	1	2	2	2	2	1	2	2	2	2	2	1	1	2	2	2	2	2	2	1	1	2	2	1	2	1	1	2	2	1	1	1	1	2	2	1	1	2	2	1	2	1	2	1	2
PRK012	Native American	2	2	1	1	2	2	1	2	1	1	2	2	2	2	1	1	2	2	2	2	2	2	1	2	1	2	1	1	1	1	1	1	1	1	1	1	2	2	1	1	2	2	2	2	1	2	1	2
PRK016	Native American	2	2	1	1	2	2	2	2	1	1	2	2	2	2	1	1	2	2	2	2	2	2	1	2	2	2	1	1	1	1	1	2	1	1	1	1	2	2	1	1	2	2	1	2	0	0	1	2
PRK021	Native American	2	2	1	1	2	2	2	2	1	1	2	2	2	2	1	1	2	2	2	2	1	2	2	2	1	1	1	1	1	1	1	2	1	1	1	1	2	2	1	1	2	2	2	2	1	2	1	1
PRK024	Native American	2	2	1	1	2	2	1	2	1	2	2	2	2	2	1	1	2	2	2	2	1	2	2	2	2	2	1	1	1	1	1	2	1	1	1	1	2	2	1	1	2	2	2	2	1	1	1	2
PRK031	Native American	2	2	1	1	2	2	2	2	1	1	2	2	2	2	1	2	2	2	2	2	1	2	1	2	2	2	1	1	1	2	1	1	1	1	1	1	2	2	1	2	2	2	1	2	1	2	1	2
PRK033	Native American	2	2	1	1	2	2	1	2	1	1	2	2	2	2	1	1	2	2	2	2	2	2	1	1	1	2	1	2	1	1	2	2	1	1	1	1	2	2	1	1	2	2	1	2	1	1	1	2
PRK034	Native American	2	2	1	1	2	2	2	2	1	1	2	2	2	2	1	1	2	2	2	2	1	2	1	2	1	2	1	1	1	1	1	2	1	1	1	1	2	2	1	1	2	2	1	2	1	1	1	1
PRK036	Native American	2	2	1	1	2	2	1	2	1	1	2	2	2	2	1	1	2	2	2	2	2	2	1	1	1	1	1	1	1	1	2	2	1	1	1	1	2	2	1	1	2	2	2	2	1	1	1	1
PRK042	Native American	2	2	1	1	2	2	1	2	1	1	2	2	2	2	1	1	2	2	2	2	2	2	1	2	1	2	1	1	1	1	1	2	1	1	1	1	2	2	1	1	2	2	2	2	1	2	1	2
PRK046	Native American	2	2	1	1	2	2	2	2	1	1	2	2	2	2	1	1	2	2	2	2	1	1	1	2	2	2	1	1	1	1	1	2	1	1	1	1	2	2	1	1	2	2	1	2	2	2	1	1
PRK049	Native American	2	2	1	1	2	2	2	2	1	2	2	2	2	2	1	1	2	2	2	2	2	2	2	2	2	2	1	1	1	1	1	1	1	1	1	1	2	2	1	1	2	2	2	2	1	1	1	1
PRK080	Native American	2	2	1	1	2	2	2	2	1	1	2	2	2	2	1	1	1	2	2	2	2	2	2	2	1	2	1	1	1	1	1	1	1	1	1	1	2	2	1	1	2	2	2	2	1	1	1	1
PTJ004	Native American	2	2	1	1	2	2	1	2	2	2	2	2	2	2	1	1	2	2	2	2	2	2	2	2	1	1	2	2	1	2	1	1	1	1	1	1	2	2	1	1	2	2	2	2	1	1	1	2
PTJ005	Native American	2	2	1	1	2	2	2	2	1	2	2	2	2	2	1	1	2	2	2	2	2	2	1	2	1	2	1	2	1	2	1	1	1	1	1	1	2	2	1	1	2	2	2	2	1	1	1	2
PTJ010	Native American	2	2	1	1	2	2	2	2	1	2	2	2	2	2	1	1	2	2	2	2	2	2	1	2	1	2	1	2	1	2	1	1	1	1	1	1	2	2	1	1	2	2	2	2	1	1	1	1
PTJ024	Native American	2	2	1	1	2	2	2	2	1	2	2	2	2	2	1	1	2	2	2	2	2	2	1	1	1	2	1	1	1	2	1	1	1	1	1	1	2	2	1	1	2	2	2	2	1	1	1	2
PTJ026	Native American	2	2	1	1	2	2	2	2	1	2	2	2	2	2	1	2	2	2	2	2	2	2	2	2	1	2	1	1	1	1	1	1	1	1	1	1	2	2	1	2	2	2	2	2	1	1	1	2
PTJ027	Native American	2	2	1	1	2	2	2	2	1	2	2	2	2	2	1	1	2	2	2	2	2	2	2	2	2	2	1	1	1	2	1	1	1	1	1	1	2	2	1	1	2	2	2	2	1	1	1	2
PTJ031	Native American	2	2	1	1	2	2	2	2	1	1	2	2	2	2	1	2	2	2	2	2	2	2	2	2	2	2	1	2	1	1	1	1	1	1	1	1	2	2	1	1	2	2	2	2	1	1	1	2
PTJ033	Native American	2	2	1	1	2	2	2	2	1	1	2	2	2	2	1	1	2	2	2	2	2	2	2	2	1	2	1	1	1	2	1	1	1	1	1	1	2	2	1	1	2	2	2	2	1	1	1	1
PTJ034	Native American	2	2	1	1	2	2	2	2	2	2	2	2	2	2	1	1	2	2	2	2	2	2	2	2	1	2	1	2	1	2	1	1	1	1	1	1	2	2	1	1	2	2	2	2	1	1	2	2
PTJ035	Native American	2	2	1	1	2	2	2	2	2	2	2	2	2	2	1	1	2	2	2	2	2	2	2	2	2	2	1	1	1	1	1	1	1	1	1	1	2	2	1	1	2	2	2	2	1	1	1	1
PTJ039	Native American	2	2	1	1	2	2	2	2	1	2	2	2	2	2	1	1	2	2	2	2	2	2	2	2	2	2	1	1	1	2	1	1	1	1	1	1	2	2	1	1	2	2	2	2	1	1	1	2
PTJ043	Native American	2	2	1	1	2	2	2	2	2	2	2	2	2	2	1	1	2	2	2	2	2	2	2	2	1	2	1	1	1	1	1	1	1	1	1	1	2	2	1	1	2	2	2	2	1	1	1	1
PTJ045	Native American	2	2	1	1	2	2	2	2	1	2	2	2	2	2	1	1	2	2	2	2	2	2	2	2	1	2	1	1	1	1	1	1	1	1	1	1	2	2	1	1	2	2	2	2	1	1	1	2
PTJ053	Native American	2	2	1	1	2	2	2	2	2	2	2	2	2	2	1	1	2	2	2	2	2	2	2	2	2	2	1	2	1	1	1	1	1	1	1	1	2	2	1	1	2	2	2	2	1	1	1	2
PTJ054	Native American	2	2	1	1	2	2	2	2	1	2	2	2	2	2	1	1	2	2	2	2	2	2	2	2	2	2	2	2	1	1	1	1	1	1	1	1	2	2	1	1	2	2	2	2	1	1	1	2
PTJ056	Native American	2	2	1	1	2	2	2	2	1	2	2	2	2	2	1	1	2	2	2	2	2	2	2	2	2	2	1	2	1	1	1	1	1	1	1	1	2	2	1	1	2	2	2	2	1	1	1	2
PTJ057	Native American	2	2	1	1	2	2	2	2	2	2	2	2	2	2	1	1	2	2	2	2	2	2	2	2	1	2	1	1	2	2	1	1	1	1	1	1	2	2	1	1	2	2	2	2	1	1	1	2
PTJ061	Native American	2	2	1	1	2	2	2	2	1	2	2	2	2	2	1	1	2	2	2	2	2	2	2	2	2	2	1	2	1	2	1	1	1	1	1	1	2	2	1	1	2	2	2	2	1	1	1	1
PTJ072	Native American	2	2	1	1	2	2	1	2	2	2	2	2	2	2	1	1	2	2	2	2	2	2	2	2	2	2	1	1	1	2	1	1	1	1	1	1	2	2	1	2	2	2	2	2	1	1	1	1
PTJ077	Native American	2	2	1	1	2	2	2	2	1	1	2	2	2	2	1	1	2	2	2	2	2	2	1	2	2	2	1	1	1	1	1	1	1	1	1	1	2	2	1	1	2	2	2	2	1	1	2	2
PTJ081	Native American	2	2	1	1	2	2	2	2	1	2	2	2	2	2	1	1	2	2	2	2	2	2	1	2	2	2	1	2	1	1	1	1	1	1	1	1	2	2	1	1	2	2	2	2	1	1	1	2
TYR003	Native American	2	2	1	1	2	2	2	2	1	1	2	2	2	2	1	1	2	2	2	2	1	2	2	2	2	2	1	2	1	2	1	1	1	1	1	1	2	2	1	1	2	2	2	2	1	1	1	2
TYR005	Native American	2	2	1	1	2	2	2	2	1	2	2	2	2	2	1	1	2	2	2	2	1	2	2	2	2	2	2	2	1	1	1	1	1	1	1	1	2	2	1	1	2	2	1	2	1	1	2	2
TYR012	Native American	2	2	1	1	2	2	1	2	1	1	2	2	2	2	1	1	2	2	1	2	1	2	2	2	1	2	1	1	1	1	1	1	1	1	1	1	2	2	1	1	2	2	1	2	1	1	1	2
TYR021	Native American	2	2	1	1	2	2	2	2	1	2	2	2	2	2	1	1	2	2	2	2	2	2	1	2	1	1	1	2	1	1	1	1	1	1	1	1	2	2	1	1	2	2	2	2	1	1	1	2
TYR022	Native American	2	2	1	1	2	2	2	2	1	1	2	2	2	2	1	1	2	2	2	2	2	2	2	2	2	2	1	2	1	2	1	1	1	1	1	1	2	2	1	1	2	2	1	2	1	1	1	2
TYR024	Native American	2	2	1	1	2	2	1	1	1	2	2	2	2	2	1	1	2	2	2	2	1	1	2	2	1	2	2	2	1	1	1	1	1	1	1	1	2	2	1	1	2	2	2	2	1	2	1	1
TYR025	Native American	2	2	1	1	2	2	1	2	1	2	2	2	2	2	1	1	2	2	2	2	2	2	2	2	1	1	1	1	1	1	1	1	1	1	1	1	2	2	1	1	2	2	1	2	1	1	2	2
TYR026	Native American	2	2	1	1	2	2	2	2	1	2	2	2	2	2	1	1	2	2	2	2	2	2	2	2	1	2	1	2	1	2	1	2	1	1	1	1	2	2	1	1	2	2	1	2	1	2	1	2
TYR028	Native American	2	2	1	1	2	2	2	2	1	1	2	2	2	2	1	1	2	2	2	2	2	2	2	2	1	2	1	1	1	1	1	2	1	1	1	1	2	2	1	1	2	2	1	2	1	1	1	2
TYR036	Native American	2	2	1	1	2	2	1	2	1	2	2	2	2	2	1	1	2	2	2	2	2	2	2	2	1	2	1	2	1	1	1	1	1	1	1	1	2	2	1	1	2	2	1	2	1	1	1	2
TYR050	Native American	2	2	1	1	2	2	2	2	1	1	2	2	2	2	1	1	2	2	2	2	1	2	1	2	1	2	1	1	1	1	1	1	1	1	1	1	2	2	1	1	1	2	1	1	1	2	2	2
TYR054	Native American	2	2	1	1	1	2	2	2	1	1	2	2	2	2	1	1	2	2	2	2	2	2	2	2	2	2	1	1	1	1	1	1	1	1	1	1	2	2	1	1	2	2	1	2	1	1	1	1
TYR057	Native American	2	2	1	1	1	2	1	2	1	1	2	2	2	2	1	1	2	2	2	2	1	2	1	2	2	2	1	2	1	1	1	1	1	1	1	1	2	2	1	1	2	2	1	1	1	2	1	2
TYR064	Native American	2	2	1	1	2	2	2	2	1	1	2	2	2	2	1	1	2	2	2	2	2	2	2	2	2	2	1	2	1	2	1	2	1	1	1	1	2	2	1	1	2	2	2	2	1	1	1	2
TYR066	Native American	2	2	1	1	2	2	1	2	1	2	2	2	2	2	1	1	2	2	2	2	2	2	2	2	2	2	1	1	1	1	1	1	1	1	1	1	2	2	1	1	2	2	1	1	1	1	1	2
TYR070	Native American	2	2	1	1	2	2	1	1	1	1	2	2	2	2	1	1	2	2	2	2	2	2	2	2	1	2	1	1	1	1	1	2	1	1	1	1	2	2	1	1	2	2	1	2	1	1	1	1
TYR077	Native American	2	2	1	1	2	2	2	2	1	1	2	2	2	2	1	1	2	2	2	2	1	2	2	2	1	2	1	2	1	2	1	1	1	1	1	1	2	2	1	1	2	2	1	1	1	1	2	2
TYR094	Native American	2	2	1	1	1	2	2	2	1	2	2	2	2	2	1	1	2	2	2	2	1	2	1	2	2	2	1	1	1	1	1	2	1	1	1	1	2	2	1	1	2	2	1	1	1	2	1	1
TYR095	Native American	2	2	1	1	2	2	1	2	1	1	2	2	2	2	1	1	2	2	2	2	2	2	1	2	1	2	1	2	1	2	1	2	1	1	1	1	2	2	1	1	2	2	1	2	1	1	1	1
TYR115	Native American	2	2	1	1	2	2	2	2	1	1	2	2	2	2	1	1	1	2	2	2	1	2	2	2	2	2	1	1	1	1	1	1	1	1	1	1	2	2	1	1	2	2	1	2	1	1	1	2
TYR119	Native American	1	2	1	1	2	2	2	2	2	2	2	2	2	2	1	1	0	0	2	2	2	2	2	2	1	2	1	2	1	1	1	1	1	1	1	1	2	2	1	1	2	2	1	2	0	0	1	1
TYR120	Native American	2	2	1	1	2	2	2	2	1	2	2	2	2	2	1	1	2	2	2	2	1	2	2	2	2	2	1	2	1	1	1	2	1	1	1	1	2	2	1	1	2	2	1	1	1	2	1	2
TYR126	Native American	2	2	1	1	2	2	1	2	1	2	2	2	2	2	1	1	2	2	2	2	1	2	2	2	1	2	1	1	1	2	1	1	1	1	1	1	2	2	1	1	2	2	1	2	1	2	1	2
TYR146	Native American	2	2	1	1	2	2	1	2	1	2	2	2	2	2	1	1	1	2	2	2	1	2	1	2	1	2	1	1	1	2	1	1	1	1	1	1	2	2	1	1	2	2	1	1	1	1	1	1
TYR147	Native American	2	2	1	1	2	2	1	2	1	2	2	2	2	2	1	1	2	2	2	2	1	2	1	2	2	2	1	1	1	1	1	2	1	1	1	1	2	2	2	2	2	2	1	2	1	2	1	1
TYR155	Native American	2	2	1	1	2	2	1	2	1	1	2	2	2	2	1	1	2	2	2	2	2	2	2	2	1	1	1	1	1	2	1	1	1	1	1	1	2	2	1	2	2	2	1	2	1	2	1	1
TYR157	Native American	2	2	1	1	2	2	2	2	1	1	2	2	2	2	1	1	2	2	2	2	2	2	2	2	1	1	1	1	1	2	1	1	1	1	1	1	2	2	1	2	1	2	1	2	1	1	1	2
TYR158	Native American	2	2	1	1	2	2	2	2	1	1	2	2	2	2	1	1	1	2	2	2	1	2	2	2	2	2	1	1	1	1	1	1	1	1	1	1	2	2	1	1	2	2	1	2	1	1	1	2
TYR159	Native American	2	2	1	1	2	2	1	2	1	1	2	2	2	2	1	1	2	2	2	2	2	2	1	1	1	2	1	1	1	1	1	1	1	1	1	1	2	2	1	1	2	2	1	1	2	2	2	2
URK004	Native American	2	2	1	1	2	2	1	2	1	1	2	2	2	2	1	1	2	2	2	2	2	2	2	2	1	2	1	1	1	1	1	1	1	1	1	1	2	2	1	1	2	2	2	2	1	2	1	1
URK005	Native American	2	2	1	1	2	2	2	2	1	1	2	2	2	2	1	1	2	2	2	2	2	2	1	1	1	1	1	2	1	1	1	1	1	1	1	1	2	2	1	1	2	2	2	2	1	1	1	1
URK009	Native American	2	2	1	1	2	2	2	2	1	2	2	2	2	2	1	1	2	2	2	2	1	2	1	1	1	2	1	1	1	1	1	1	1	1	1	1	2	2	1	1	2	2	2	2	1	1	1	2
URK014	Native American	2	2	1	1	2	2	1	2	1	1	2	2	2	2	1	1	2	2	2	2	2	2	1	1	2	2	1	2	1	1	1	1	1	1	1	1	2	2	1	1	2	2	1	2	1	1	1	1
URK015	Native American	2	2	1	1	2	2	2	2	1	2	2	2	2	2	1	1	2	2	2	2	1	2	1	1	2	2	1	1	1	1	1	1	1	1	1	1	2	2	1	1	2	2	2	2	1	1	1	2
URK019	Native American	2	2	1	1	2	2	2	2	1	1	2	2	2	2	1	1	2	2	2	2	1	2	1	1	2	2	1	1	1	1	1	1	1	1	1	1	2	2	1	1	2	2	2	2	1	1	1	2
URK021	Native American	2	2	1	1	2	2	2	2	1	1	2	2	2	2	1	1	2	2	2	2	1	2	1	1	1	1	1	1	1	1	1	1	1	1	1	1	2	2	1	1	2	2	2	2	1	1	1	1
URK022	Native American	2	2	1	1	2	2	2	2	1	2	2	2	2	2	1	1	2	2	2	2	2	2	1	1	1	1	1	1	1	1	1	1	1	1	1	1	2	2	1	1	2	2	1	2	1	2	1	1
URK026	Native American	2	2	1	1	2	2	2	2	1	1	2	2	2	2	1	1	2	2	2	2	2	2	1	1	2	2	1	2	1	1	1	1	1	1	1	1	2	2	1	1	2	2	1	2	1	2	2	2
URK029	Native American	2	2	1	1	2	2	1	2	1	1	2	2	2	2	1	1	2	2	2	2	2	2	1	1	1	2	1	2	1	1	1	1	1	1	1	1	2	2	1	1	2	2	2	2	1	1	1	2
URK030	Native American	2	2	1	1	2	2	2	2	1	1	2	2	2	2	1	1	2	2	2	2	1	2	1	2	1	2	1	1	1	1	1	2	1	1	1	1	2	2	1	1	2	2	1	2	1	1	1	2
URK034	Native American	2	2	1	1	2	2	2	2	1	1	2	2	2	2	1	1	2	2	2	2	1	1	1	1	1	1	1	1	1	1	1	1	1	1	1	1	2	2	1	1	2	2	1	2	1	1	1	2
URK036	Native American	2	2	1	1	2	2	2	2	1	1	2	2	2	2	1	1	2	2	2	2	2	2	1	1	2	2	1	2	1	1	2	2	1	1	1	1	2	2	1	1	2	2	1	2	1	1	1	1
URK038	Native American	2	2	1	1	2	2	1	2	1	1	2	2	2	2	1	1	2	2	2	2	1	2	1	1	2	2	2	2	1	1	1	2	1	1	1	1	2	2	1	1	2	2	2	2	1	2	1	2
URK040	Native American	2	2	1	1	2	2	2	2	1	1	2	2	2	2	1	1	2	2	2	2	1	1	1	1	2	2	2	2	1	1	1	1	1	1	1	1	2	2	1	1	2	2	2	2	1	2	1	2
URK042	Native American	2	2	1	1	2	2	2	2	1	1	2	2	2	2	1	1	2	2	2	2	2	2	1	2	1	2	1	2	1	1	1	1	1	1	1	1	2	2	1	1	2	2	1	2	1	1	1	1
URK044	Native American	2	2	1	1	2	2	2	2	1	2	2	2	2	2	1	2	2	2	2	2	2	2	2	2	1	2	1	1	1	1	1	1	1	1	1	1	2	2	1	1	2	2	1	1	1	1	1	1
URK058	Native American	2	2	1	1	2	2	2	2	1	1	2	2	2	2	1	1	2	2	2	2	2	2	1	2	1	1	1	2	1	1	1	1	1	1	1	1	2	2	1	1	2	2	1	1	1	1	1	1
URK059	Native American	2	2	1	1	2	2	2	2	1	1	2	2	2	2	1	1	2	2	2	2	1	2	1	2	1	2	1	1	1	1	1	1	1	1	1	1	2	2	1	1	2	2	2	2	1	1	1	1
URK060	Native American	2	2	1	1	2	2	2	2	1	2	2	2	2	2	1	1	2	2	2	2	2	2	1	2	1	2	1	1	1	1	1	1	1	1	1	1	2	2	1	1	2	2	2	2	1	1	1	1
URK070	Native American	2	2	1	1	1	2	1	2	1	1	2	2	2	2	1	1	2	2	2	2	2	2	1	2	2	2	1	2	1	1	1	2	1	1	1	1	2	2	1	1	2	2	2	2	1	2	1	2
URK071	Native American	2	2	1	1	2	2	2	2	1	1	2	2	2	2	1	1	2	2	2	2	1	2	2	2	2	2	1	2	1	1	1	2	1	1	1	1	2	2	1	1	2	2	2	2	1	2	1	1
URK074	Native American	2	2	1	1	2	2	1	2	1	1	2	2	2	2	1	1	2	2	2	2	1	2	1	2	2	2	1	1	1	1	1	1	1	1	1	1	2	2	1	1	2	2	1	2	1	1	1	1
URK075	Native American	2	2	1	1	2	2	2	2	1	1	2	2	2	2	1	1	2	2	2	2	1	2	2	2	2	2	1	1	1	1	1	1	1	1	1	1	2	2	1	1	2	2	1	2	1	1	1	2
URK076	Native American	2	2	1	1	2	2	2	2	1	1	2	2	2	2	1	1	2	2	2	2	2	2	2	2	1	1	1	2	1	1	1	1	1	1	1	1	2	2	1	1	2	2	2	2	1	1	1	1
URK081	Native American	2	2	1	1	2	2	2	2	1	1	2	2	2	2	1	1	2	2	2	2	1	1	1	2	2	2	1	2	1	1	1	1	1	1	1	1	2	2	1	1	2	2	1	2	1	1	2	2
URK090	Native American	2	2	1	1	2	2	2	2	1	1	2	2	2	2	1	1	2	2	2	2	2	2	1	2	2	2	2	2	1	1	2	2	1	1	1	1	2	2	1	1	2	2	2	2	1	1	1	2
URK095	Native American	2	2	1	1	2	2	1	2	1	1	2	2	2	2	1	1	2	2	2	2	1	2	2	2	2	2	1	2	1	1	1	1	1	1	1	1	2	2	1	1	2	2	2	2	1	2	1	2
WPI002	Native American	2	2	1	1	2	2	2	2	1	2	2	2	2	2	1	1	2	2	2	2	2	2	2	2	2	2	1	2	1	1	1	1	1	1	1	1	2	2	1	1	2	2	2	2	1	1	1	2
WPI003	Native American	2	2	1	1	2	2	2	2	1	1	2	2	2	2	1	1	2	2	2	2	2	2	2	2	2	2	1	1	1	1	1	1	1	1	1	1	2	2	1	2	2	2	2	2	1	1	2	2
WPI004	Native American	2	2	1	1	2	2	2	2	1	1	2	2	2	2	1	1	2	2	2	2	2	2	2	2	1	2	1	2	1	1	1	1	1	1	1	1	1	2	1	1	2	2	2	2	1	1	1	2
WPI011	Native American	2	2	1	1	2	2	2	2	1	1	2	2	2	2	1	1	2	2	2	2	1	2	2	2	2	2	2	2	1	1	1	1	1	1	1	1	2	2	1	2	2	2	2	2	1	1	2	2
WPI014	Native American	2	2	1	1	2	2	2	2	1	1	2	2	2	2	1	1	2	2	2	2	2	2	2	2	1	2	1	1	1	1	1	1	1	1	1	1	1	2	1	2	2	2	2	2	1	1	2	2
WPI017	Native American	2	2	1	1	2	2	2	2	1	2	2	2	2	2	1	1	2	2	2	2	2	2	2	2	2	2	1	1	1	1	1	1	1	1	1	1	2	2	1	2	2	2	2	2	1	1	2	2
WPI018	Native American	2	2	1	1	2	2	2	2	2	2	2	2	2	2	1	1	2	2	2	2	2	2	2	2	2	2	1	1	1	1	1	1	1	1	1	1	2	2	1	2	2	2	2	2	1	1	2	2
WPI025	Native American	2	2	1	1	2	2	1	2	1	2	2	2	2	2	1	1	2	2	2	2	2	2	2	2	2	2	1	1	1	1	1	1	1	1	1	1	2	2	1	1	2	2	2	2	1	2	1	2
WPI026	Native American	2	2	1	1	2	2	2	2	1	1	2	2	2	2	1	1	2	2	2	2	2	2	2	2	1	2	1	1	1	1	1	1	1	1	1	1	1	2	2	2	2	2	2	2	1	1	2	2
WPI027	Native American	2	2	1	1	2	2	2	2	1	1	2	2	2	2	1	1	2	2	2	2	2	2	2	2	2	2	1	1	1	1	1	1	1	1	1	1	1	2	1	2	2	2	2	2	1	1	1	2
WPI045	Native American	2	2	1	1	2	2	2	2	1	1	2	2	2	2	1	1	2	2	2	2	2	2	2	2	1	2	1	2	1	1	1	1	1	1	1	1	2	2	2	2	2	2	2	2	1	1	2	2
WPI046	Native American	2	2	1	1	2	2	1	2	1	2	2	2	2	2	1	1	2	2	2	2	2	2	2	2	2	2	1	2	1	1	1	1	1	1	1	1	1	2	1	2	2	2	2	2	1	2	1	2
WPI047	Native American	2	2	1	1	2	2	1	2	1	2	2	2	2	2	1	1	2	2	2	2	2	2	2	2	2	2	1	2	1	1	1	1	1	1	1	1	2	2	1	2	2	2	2	2	1	1	1	2
WPI051	Native American	2	2	1	1	2	2	2	2	1	1	2	2	2	2	1	1	2	2	2	2	2	2	2	2	1	2	1	1	1	1	1	1	1	1	1	1	2	2	2	2	2	2	2	2	1	2	2	2
WPI058	Native American	2	2	1	1	2	2	2	2	1	1	2	2	2	2	1	1	2	2	2	2	2	2	2	2	1	2	1	1	1	1	1	1	1	1	1	1	2	2	1	2	2	2	2	2	1	2	2	2
WPI059	Native American	2	2	1	1	2	2	2	2	1	2	2	2	2	2	1	1	2	2	2	2	2	2	2	2	1	2	1	1	1	1	1	1	1	1	1	1	2	2	1	1	2	2	2	2	1	1	1	2
WPI060	Native American	2	2	1	1	2	2	2	2	1	2	2	2	2	2	1	1	2	2	2	2	1	2	2	2	2	2	2	2	1	1	1	1	1	1	1	1	2	2	1	1	2	2	2	2	1	1	2	2
WPI063	Native American	2	2	1	1	2	2	1	2	1	1	2	2	2	2	1	1	2	2	2	2	2	2	2	2	2	2	1	1	1	1	1	1	1	1	1	1	1	2	1	2	2	2	2	2	1	1	2	2
WPI068	Native American	2	2	1	1	2	2	2	2	1	1	2	2	2	2	1	1	2	2	2	2	2	2	2	2	2	2	1	2	1	1	1	1	1	1	1	1	2	2	2	2	2	2	2	2	1	1	1	2
475II	North	1	2	1	2	1	2	1	1	2	2	2	2	2	2	1	2	1	2	1	2	1	1	1	1	1	2	2	2	2	2	1	1	1	2	1	2	2	2	1	1	1	1	2	2	1	1	1	2
662II	North	1	2	1	1	2	2	1	1	2	2	1	2	1	2	1	2	2	2	2	2	1	2	1	1	1	2	1	2	1	2	1	1	1	1	1	2	1	2	1	2	2	2	1	2	1	2	1	2
a3395	North	1	2	1	1	2	2	1	1	1	2	1	2	1	2	1	1	2	2	1	2	2	2	1	2	1	2	1	2	1	2	1	2	2	2	1	2	1	2	1	1	1	2	2	2	1	1	1	1
a6068	North	1	2	1	2	1	2	1	2	2	2	2	2	2	2	2	2	2	2	2	2	1	1	1	2	1	2	1	2	1	2	1	1	1	2	1	2	2	2	1	2	1	2	2	2	1	1	1	2
a6076	North	1	2	1	1	1	1	1	1	2	2	2	2	1	1	2	2	1	2	1	2	1	2	1	1	1	1	2	2	1	1	2	2	2	2	1	1	2	2	1	2	1	2	2	2	1	2	1	2
a7071	North	2	2	1	2	1	2	2	2	2	2	2	2	1	1	1	1	2	2	1	2	1	2	1	1	1	2	1	2	1	2	1	2	1	2	1	1	2	2	1	2	1	2	1	2	1	1	1	1
a7075	North	2	2	1	1	1	2	1	2	1	2	2	2	1	2	1	1	2	2	1	2	2	2	1	1	1	2	2	2	1	2	1	1	1	2	1	1	1	2	1	2	1	2	1	1	1	2	1	1
a7080	North	1	2	1	1	2	2	1	1	1	1	2	2	1	1	1	2	2	2	1	1	2	2	1	1	1	1	2	2	2	2	1	1	1	2	1	1	2	2	2	2	1	1	2	2	1	1	1	1
ferreyra	North	2	2	1	1	1	2	2	2	2	2	2	2	1	2	1	1	2	2	2	2	1	2	1	1	1	2	1	2	1	2	1	2	1	2	1	2	2	2	2	2	1	2	1	2	1	1	1	2
kledan	North	1	2	2	2	2	2	2	2	1	2	2	2	1	2	1	2	2	2	1	2	1	2	1	1	1	1	2	2	1	2	1	1	1	2	1	1	2	2	2	2	2	2	2	2	1	1	1	2
lilkat	North	1	2	2	2	2	2	1	2	1	2	2	2	1	1	1	2	1	2	1	2	1	2	1	1	1	2	1	2	1	2	1	2	1	2	1	2	2	2	1	1	1	2	1	1	1	1	1	1
norte123P	North	1	2	1	1	1	2	1	1	1	2	2	2	2	2	1	2	2	2	1	1	1	2	1	2	1	2	1	2	1	2	1	1	2	2	1	1	2	2	2	2	2	2	2	2	1	2	1	2
norte128P	North	1	2	1	1	1	2	1	1	1	2	2	2	2	2	1	2	2	2	1	2	2	2	1	1	1	2	2	2	1	2	1	1	2	2	1	1	2	2	1	2	2	2	2	2	1	1	1	2
norte140P	North	1	1	1	1	1	2	1	1	2	2	1	2	1	2	2	2	1	1	1	2	1	2	1	1	1	2	2	2	1	1	1	1	1	1	1	1	1	2	1	1	1	1	1	2	2	2	2	2
norte145P	North	1	1	1	1	1	2	1	2	1	1	2	2	1	2	1	1	2	2	2	2	2	2	1	1	1	1	2	2	2	2	1	1	2	2	2	2	2	2	1	1	1	1	1	2	1	1	1	2
norte146P	North	1	2	1	1	1	2	1	1	1	2	2	2	1	2	1	1	2	2	2	2	1	2	1	2	1	1	1	2	2	2	1	2	1	2	1	2	2	2	1	2	2	2	1	1	1	1	2	2
norte147P	North	1	2	1	2	1	1	1	1	1	2	2	2	1	1	2	2	1	2	1	2	1	2	1	2	1	1	1	2	1	2	1	1	1	1	1	1	2	2	2	2	2	2	1	2	1	1	1	2
norte148P	North	1	1	1	1	2	2	1	1	1	2	2	2	1	2	1	2	2	2	1	2	1	2	1	2	1	1	2	2	1	1	1	2	2	2	1	1	2	2	1	2	2	2	1	2	1	1	1	2
norte149P	North	1	1	2	2	2	2	1	2	1	1	1	2	1	2	2	2	1	2	2	2	2	2	1	1	2	2	1	1	2	2	2	2	2	2	2	2	2	2	1	1	1	1	1	2	1	1	1	2
norte150P	North	1	2	1	1	1	2	1	2	2	2	2	2	2	2	1	2	1	2	1	2	1	1	1	2	1	2	1	1	1	1	1	2	2	2	1	1	2	2	1	2	1	1	2	2	1	1	2	2
norte151P	North	1	2	1	1	2	2	1	1	1	2	2	2	1	2	2	2	2	2	2	2	1	1	1	1	1	1	2	2	2	2	1	1	1	2	1	1	2	2	2	2	1	1	1	2	1	1	2	2
norte152P	North	2	2	1	1	1	1	1	2	1	2	1	2	1	2	1	1	2	2	1	2	1	2	1	1	2	2	1	2	1	1	1	2	1	2	1	1	1	2	1	2	2	2	2	2	1	1	1	2
norte153P	North	1	2	1	1	1	2	1	1	2	2	2	2	1	2	1	1	2	2	1	1	1	1	1	2	1	1	2	2	2	2	1	1	1	2	1	2	1	2	1	1	2	2	2	2	1	2	1	1
norte154P	North	1	1	1	2	1	2	1	2	1	2	1	2	2	2	1	2	2	2	1	2	1	1	1	2	1	2	1	2	2	2	1	1	1	2	1	2	1	2	1	1	1	1	1	1	1	2	1	2
norte156P	North	2	2	1	2	2	2	1	2	1	2	1	2	2	2	1	1	2	2	2	2	1	1	1	2	1	1	1	2	1	2	1	2	1	2	1	2	1	2	1	2	2	2	2	2	1	1	1	1
norte157P	North	2	2	1	2	1	1	1	1	2	2	2	2	1	1	1	2	2	2	1	1	1	2	1	2	1	1	2	2	1	2	1	1	1	2	1	2	2	2	1	2	1	2	1	2	1	1	1	1
norte158P	North	2	2	1	2	2	2	1	1	2	2	2	2	1	1	1	2	1	2	1	2	2	2	1	1	1	1	1	2	1	2	1	1	1	2	1	2	2	2	2	2	1	2	2	2	1	1	2	2
norte159P	North	2	2	2	2	1	1	1	2	2	2	1	2	1	2	2	2	1	2	1	2	2	2	1	2	2	2	1	2	2	2	1	2	1	1	1	1	1	2	1	2	2	2	2	2	1	1	1	1
norte160P	North	1	2	1	2	1	2	1	1	1	2	2	2	1	1	2	2	1	2	1	2	2	2	1	2	2	2	1	2	2	2	1	1	2	2	1	2	2	2	1	2	1	1	1	2	1	1	1	2
norte161P	North	2	2	1	1	2	2	1	2	2	2	2	2	1	2	2	2	1	2	1	2	1	2	1	1	1	2	1	2	2	2	1	1	1	1	1	1	2	2	2	2	2	2	2	2	1	1	2	2
norte162P	North	2	2	1	1	2	2	1	1	1	2	2	2	1	2	2	2	2	2	2	2	1	2	1	1	1	2	1	1	1	2	2	2	1	2	1	1	2	2	1	2	2	2	2	2	1	1	1	2
norte163P	North	2	2	1	1	1	2	1	1	2	2	1	1	1	2	1	2	2	2	1	2	2	2	1	1	1	2	1	1	2	2	1	1	1	1	1	1	1	1	2	2	1	1	1	2	1	2	2	2
norte164P	North	2	2	1	2	1	2	1	1	2	2	2	2	1	1	2	2	1	2	2	2	2	2	1	2	1	2	2	2	1	2	1	1	1	2	1	1	1	2	2	2	2	2	1	2	1	1	1	2
norte165P	North	1	2	1	1	1	2	1	1	2	2	2	2	1	2	1	1	2	2	1	2	2	2	1	1	1	1	1	2	2	2	1	2	2	2	2	2	2	2	2	2	1	2	2	2	1	2	1	1
norte166P	North	1	2	1	1	2	2	1	2	2	2	2	2	1	2	1	2	1	1	2	2	2	2	1	2	2	2	2	2	1	2	1	2	2	2	1	2	2	2	2	2	1	2	2	2	1	1	1	1
norte168P	North	2	2	1	1	2	2	1	2	1	1	2	2	1	2	2	2	2	2	2	2	1	2	1	2	2	2	1	2	2	2	1	1	1	2	1	2	2	2	2	2	2	2	2	2	1	2	1	2
norte172P	North	2	2	1	1	1	1	2	2	1	1	1	2	2	2	1	1	2	2	2	2	1	1	1	2	2	2	2	2	1	2	1	1	2	2	1	1	1	2	1	2	2	2	1	2	1	1	1	2
norte174P	North	1	2	1	1	2	2	1	2	2	2	2	2	1	1	1	2	2	2	2	2	2	2	1	2	1	1	2	2	1	2	1	1	1	2	1	2	2	2	1	2	1	2	2	2	1	1	1	2
norte194P	North	1	2	1	2	2	2	1	1	1	2	1	2	1	1	1	1	2	2	1	2	2	2	1	1	1	1	1	2	2	2	1	2	1	1	1	1	1	2	1	2	1	2	1	2	1	2	1	2
norte52P	North	2	2	1	1	2	2	1	2	2	2	1	2	1	2	1	2	2	2	1	2	1	1	1	2	2	2	1	1	2	2	1	1	1	1	1	1	2	2	1	2	2	2	1	2	1	2	1	2
valenzuela	North	1	2	1	1	1	2	1	1	1	2	2	2	2	2	2	2	1	2	1	1	1	1	1	2	1	1	2	2	1	1	1	1	1	2	1	2	2	2	1	1	1	2	1	2	1	1	1	1
9768	Center	1	2	1	1	1	2	2	2	1	2	2	2	1	2	1	2	1	2	1	1	1	1	1	2	1	1	1	2	1	2	1	1	1	1	1	1	2	2	1	2	1	1	2	2	1	1	1	2
9847	Center	2	2	1	1	2	2	1	2	2	2	2	2	1	1	1	2	2	2	1	2	1	1	2	2	1	1	1	1	2	2	1	2	1	2	1	1	2	2	1	2	2	2	2	2	1	1	1	1
9852	Center	1	2	1	1	2	2	1	1	1	2	1	2	1	1	1	2	2	2	1	1	1	1	1	1	1	2	1	2	2	2	1	2	2	2	1	2	1	2	1	1	2	2	2	2	1	2	1	2
9956	Center	1	2	1	1	2	2	1	2	2	2	1	2	2	2	1	1	2	2	2	2	1	2	2	2	1	2	1	2	1	2	1	1	2	2	1	2	1	2	1	1	1	2	1	2	1	1	1	2
9960	Center	2	2	1	1	1	1	1	2	1	2	2	2	1	2	1	1	1	2	2	2	1	1	1	1	1	1	1	2	2	2	1	1	1	1	1	1	2	2	1	2	2	2	1	2	1	2	1	1
9965	Center	2	2	1	1	1	1	1	1	2	2	1	1	2	2	1	1	2	2	1	2	1	1	1	2	1	2	2	2	1	1	1	1	1	2	1	1	1	1	2	2	2	2	1	2	1	1	1	2
9957II	Center	2	2	1	2	2	2	1	1	1	2	2	2	1	1	1	2	2	2	2	2	1	1	1	1	1	1	1	1	2	2	1	1	2	2	1	2	2	2	2	2	1	2	2	2	1	1	1	2
A1045	Center	2	2	1	1	1	2	2	2	1	2	2	2	1	2	1	2	2	2	2	2	1	2	1	2	1	2	1	1	1	2	1	1	1	1	1	2	2	2	2	2	2	2	2	2	1	1	1	2
A1088	Center	2	2	1	1	2	2	1	1	1	1	2	2	1	1	1	1	2	2	1	2	1	1	2	2	1	2	2	2	1	2	1	1	1	1	1	1	2	2	1	1	2	2	2	2	1	2	1	1
A1090	Center	1	2	1	1	2	2	1	2	1	1	2	2	1	2	1	2	1	2	2	2	1	1	2	2	2	2	2	2	1	2	1	1	1	2	1	1	2	2	2	2	2	2	1	2	1	1	2	2
a3060	Center	1	2	1	1	2	2	1	1	1	2	1	2	1	1	1	1	1	2	1	1	1	2	1	2	1	2	1	1	2	2	1	1	2	2	1	2	1	2	1	1	1	1	1	2	1	1	1	1
a3090	Center	2	2	1	1	1	2	2	2	2	2	2	2	1	2	1	2	2	2	2	2	1	2	2	2	1	2	2	2	1	2	1	1	1	1	1	1	2	2	1	2	1	2	1	2	1	1	1	2
a4199	Center	1	2	1	2	2	2	1	1	1	2	2	2	1	2	1	2	2	2	2	2	2	2	1	1	1	1	2	2	2	2	1	2	2	2	1	2	2	2	2	2	2	2	1	2	1	1	1	2
a5412	Center	2	2	1	2	1	1	1	2	1	2	2	2	1	1	2	2	2	2	2	2	1	2	2	2	1	2	2	2	1	2	1	2	2	2	1	2	2	2	1	2	2	2	2	2	1	1	2	2
a5413	Center	1	2	1	2	1	2	1	2	2	2	2	2	1	2	2	2	1	2	2	2	1	2	1	1	1	1	1	2	2	2	1	1	2	2	1	2	2	2	1	2	1	1	1	2	1	1	1	1
a5419	Center	1	2	1	2	1	2	1	1	2	2	2	2	1	1	2	2	1	2	1	2	1	2	1	1	1	1	1	2	1	2	2	2	1	2	1	1	2	2	2	2	2	2	2	2	1	1	2	2
a5454	Center	1	2	1	1	2	2	2	2	1	2	2	2	1	1	1	1	2	2	1	2	1	1	2	2	1	1	1	2	2	2	1	1	1	2	1	1	2	2	1	2	1	2	2	2	1	1	1	1
a6350	Center	2	2	1	2	1	2	1	2	2	2	2	2	1	2	1	2	2	2	2	2	1	2	1	1	1	2	1	2	1	2	1	1	1	2	1	1	2	2	2	2	1	2	1	2	1	1	1	1
a6445	Center	1	2	2	2	2	2	1	1	2	2	2	2	2	2	1	1	2	2	2	2	1	1	1	2	1	1	1	2	1	2	1	1	1	2	1	1	2	2	1	2	1	2	1	2	1	1	1	2
a6446	Center	1	2	1	1	2	2	1	1	1	2	2	2	1	2	1	1	2	2	1	2	2	2	1	2	1	1	1	2	2	2	1	1	1	2	1	1	2	2	1	1	2	2	1	2	1	1	1	1
a6602	Center	2	2	1	1	2	2	1	2	1	2	2	2	1	2	1	1	2	2	1	1	1	1	2	2	2	2	1	2	2	2	1	2	2	2	1	1	2	2	1	1	2	2	1	2	1	1	1	2
a6604	Center	1	2	2	2	2	2	1	1	2	2	2	2	2	2	1	2	2	2	1	2	1	2	1	1	1	1	1	1	2	2	1	2	1	1	1	1	2	2	2	2	1	2	2	2	1	1	1	1
a6753	Center	1	1	2	2	1	1	1	1	1	2	1	2	1	1	1	2	1	2	1	2	1	1	1	1	1	1	2	2	1	2	1	1	2	2	1	1	1	2	2	2	2	2	2	2	1	2	1	1
a6991	Center	1	2	1	1	1	2	1	1	2	2	2	2	1	1	1	1	2	2	1	2	1	2	1	1	1	1	1	1	1	2	1	1	2	2	1	1	2	2	1	2	1	2	1	2	1	2	1	2
a6996	Center	1	2	1	1	2	2	1	1	2	2	1	2	1	1	2	2	1	1	1	2	1	2	1	1	1	1	2	2	1	2	1	2	1	2	1	2	1	2	2	2	1	2	1	2	1	1	1	1
a6998	Center	2	2	1	1	2	2	1	1	2	2	2	2	1	1	1	2	2	2	1	1	1	2	1	1	1	2	1	1	1	2	1	2	1	2	1	2	2	2	2	2	2	2	2	2	1	2	1	2
a7064	Center	1	2	1	2	2	2	1	1	1	1	2	2	1	2	1	2	2	2	1	2	1	1	1	1	1	1	2	2	2	2	1	1	2	2	1	1	2	2	1	2	1	2	2	2	1	2	1	1
a7085	Center	2	2	1	2	1	2	1	2	1	2	2	2	1	2	1	1	2	2	2	2	1	2	1	2	1	2	1	2	2	2	1	1	1	2	1	1	2	2	1	1	1	2	1	2	0	0	1	2
a7087	Center	1	1	1	1	1	2	1	2	2	2	2	2	1	1	1	2	1	2	1	2	1	2	1	1	1	1	2	2	2	2	1	2	2	2	1	2	2	2	1	2	1	2	2	2	1	1	1	2
a896	Center	2	2	2	2	1	2	1	2	1	2	2	2	1	1	2	2	1	2	1	1	2	2	1	1	1	1	1	1	1	1	1	1	1	2	1	1	2	2	2	2	2	2	1	2	1	1	1	2
becker	Center	1	2	1	1	1	1	1	1	2	2	2	2	1	1	1	2	1	2	1	2	1	2	1	1	1	1	2	2	1	2	1	1	1	2	2	2	2	2	2	2	2	2	2	2	1	1	1	1
bocovich	Center	1	2	1	1	1	1	1	1	2	2	1	2	1	1	2	2	1	1	1	2	1	2	1	1	1	2	1	1	2	2	1	2	1	2	1	1	1	2	1	2	1	1	2	2	1	1	1	1
bonfanti	Center	2	2	1	2	1	2	1	1	2	2	2	2	1	1	1	2	2	2	1	2	1	2	1	2	1	2	1	2	2	2	2	2	1	2	1	1	1	2	2	2	1	2	1	2	1	2	1	2
bullonseb	Center	1	2	2	2	2	2	1	1	1	2	2	2	1	2	1	1	2	2	1	2	1	1	1	1	2	2	1	2	2	2	1	1	1	2	1	1	2	2	1	2	2	2	1	2	1	1	1	2
cabeza	Center	2	2	1	1	1	2	1	1	1	2	1	2	1	2	2	2	2	2	2	2	1	1	1	1	1	1	2	2	1	2	1	2	1	2	1	1	1	2	1	2	2	2	2	2	1	1	1	2
carcelero	Center	1	2	1	1	1	1	1	2	1	2	1	2	1	2	1	2	1	2	1	2	1	2	1	2	1	2	1	2	1	2	1	2	1	2	1	1	1	2	1	2	1	2	2	2	1	2	1	1
centro101P	Center	2	2	1	1	1	2	1	2	1	1	1	2	1	1	1	1	1	2	1	1	1	1	1	1	1	2	2	2	1	1	1	1	1	2	1	1	1	2	2	2	2	2	1	1	2	2	1	2
centro108P	Center	2	2	1	1	1	2	1	1	1	1	2	2	1	2	1	1	2	2	1	1	1	2	1	2	2	2	1	2	1	2	1	2	1	2	1	1	1	2	1	1	2	2	1	2	1	1	1	2
centro10P	Center	1	1	1	2	1	1	1	2	1	2	2	2	1	2	1	2	1	2	1	1	1	2	1	2	1	1	2	2	1	2	1	1	1	2	1	2	1	2	1	1	1	2	1	2	1	1	1	1
centro116P	Center	1	2	1	1	2	2	1	2	2	2	0	0	1	1	1	2	2	2	1	2	2	2	1	1	1	2	2	2	2	2	1	2	2	2	1	2	2	2	1	1	1	2	1	1	1	1	1	1
centro117P	Center	2	2	1	2	2	2	1	1	1	2	2	2	1	2	2	2	2	2	1	2	1	1	1	1	2	2	2	2	1	2	1	1	1	2	1	2	2	2	2	2	1	2	1	2	1	2	1	2
centro11P	Center	1	2	1	1	1	2	1	1	1	2	2	2	1	2	1	2	2	2	1	2	1	2	1	1	1	1	1	1	2	2	1	1	2	2	2	2	1	2	1	2	1	2	2	2	1	1	1	1
centro12P	Center	2	2	1	1	1	1	1	2	1	2	2	2	1	2	1	2	2	2	2	2	1	1	2	2	1	1	1	1	2	2	1	1	1	1	1	2	2	2	2	2	1	2	2	2	1	1	1	1
centro13P	Center	2	2	1	1	1	2	1	1	2	2	2	2	1	2	1	2	2	2	1	2	1	2	1	1	1	2	2	2	1	2	1	2	2	2	1	1	2	2	1	1	1	2	2	2	1	2	1	2
centro14P	Center	1	2	1	2	1	2	1	1	1	2	2	2	2	2	1	1	2	2	1	1	1	1	1	2	1	1	2	2	1	1	1	2	1	2	1	1	1	2	1	1	1	2	1	1	1	2	1	2
centro15P	Center	2	2	1	2	1	2	1	1	1	2	2	2	2	2	1	2	2	2	1	2	1	2	1	1	1	1	1	1	1	2	1	2	1	1	2	2	1	2	2	2	1	1	2	2	1	1	1	1
centro169P	Center	2	2	1	1	1	2	1	1	1	2	1	2	1	2	2	2	2	2	1	2	1	2	1	1	1	1	1	2	2	2	2	2	2	2	1	2	1	2	1	2	2	2	1	1	1	1	1	1
centro16P	Center	1	2	1	1	1	2	1	2	1	2	1	2	1	2	2	2	2	2	1	2	1	2	1	2	1	1	1	2	2	2	1	1	1	1	1	2	2	2	1	1	1	2	2	2	1	1	1	2
centro170P	Center	1	2	1	1	1	1	1	2	2	2	2	2	1	1	1	2	2	2	1	2	2	2	1	1	1	1	2	2	2	2	1	1	2	2	1	1	2	2	1	2	2	2	2	2	1	2	1	2
centro171P	Center	2	2	1	1	2	2	2	2	1	1	1	2	1	2	1	2	2	2	2	2	1	1	2	2	1	2	1	2	1	2	1	1	2	2	1	1	1	2	1	2	2	2	2	2	1	1	2	2
centro175P	Center	2	2	1	1	2	2	2	2	2	2	2	2	1	2	2	2	2	2	2	2	1	2	2	2	1	2	1	2	1	1	1	1	1	1	1	1	2	2	2	2	2	2	1	1	2	2	1	1
CENTRO177P	Center	1	2	1	1	1	2	1	2	2	2	2	2	2	2	2	2	2	2	2	2	1	1	1	2	1	1	2	2	2	2	1	2	1	2	1	1	2	2	1	2	2	2	1	1	1	1	2	2
centro17P	Center	2	2	1	1	1	1	1	1	1	2	2	2	1	2	2	2	2	2	1	2	1	2	1	1	1	2	1	2	1	2	1	1	2	2	1	2	2	2	1	2	1	2	2	2	1	2	1	1
centro180P	Center	2	2	1	1	2	2	1	1	2	2	2	2	1	1	1	2	2	2	1	2	1	2	1	1	2	2	1	2	1	1	1	1	1	2	1	2	2	2	1	2	1	2	1	2	1	1	1	1
centro183P	Center	1	1	1	2	1	1	1	1	1	2	1	1	1	2	2	2	2	2	1	1	2	2	1	2	1	1	2	2	2	2	1	1	2	2	1	1	1	1	1	2	1	2	1	1	1	1	2	2
centro186P	Center	2	2	1	1	2	2	1	1	2	2	1	2	2	2	1	2	2	2	1	2	1	1	1	1	1	2	1	1	2	2	1	2	2	2	1	2	1	2	1	2	2	2	1	2	1	2	1	1
centro187P	Center	2	2	1	1	2	2	1	2	1	2	2	2	2	2	1	2	2	2	2	2	1	1	1	2	1	2	1	2	1	2	1	1	1	1	1	1	2	2	1	2	2	2	2	2	1	1	1	1
centro18P	Center	2	2	1	2	2	2	1	1	1	2	1	2	1	1	2	2	1	2	1	2	1	2	1	1	1	2	1	1	2	2	2	2	2	2	2	2	1	2	1	2	1	2	1	2	1	1	2	2
centro190P	Center	2	2	1	1	2	2	2	2	1	2	0	0	1	2	2	2	2	2	2	2	1	2	2	2	1	2	1	2	2	2	1	1	2	2	1	1	2	2	1	1	2	2	2	2	1	1	1	2
CENTRO192P	Center	1	2	1	1	1	2	1	1	1	2	2	2	2	2	2	2	1	2	1	1	1	2	1	2	1	1	2	2	1	1	1	1	1	2	1	2	2	2	1	1	1	2	1	2	1	1	1	1
centro19P	Center	2	2	1	2	2	2	1	2	1	2	2	2	2	2	1	1	2	2	2	2	2	2	2	2	2	2	1	1	2	2	1	1	2	2	1	1	2	2	1	1	2	2	1	2	1	1	1	1
centro1P	Center	1	2	1	1	1	1	1	2	1	2	2	2	1	2	2	2	2	2	1	2	1	2	1	1	1	1	2	2	1	2	1	2	1	1	1	1	2	2	2	2	2	2	1	2	1	1	2	2
centro20P	Center	2	2	1	2	2	2	1	1	2	2	2	2	1	2	1	2	2	2	1	2	1	2	1	2	1	2	1	1	2	2	1	1	2	2	1	1	2	2	1	1	1	2	2	2	1	2	1	2
centro22P	Center	1	2	1	2	1	2	1	1	2	2	2	2	2	2	1	2	2	2	2	2	1	1	2	2	1	2	1	1	1	2	1	1	2	2	1	1	2	2	1	1	2	2	1	2	1	1	1	1
centro23P	Center	2	2	1	1	2	2	1	1	2	2	1	2	1	1	1	2	1	1	2	2	2	2	1	1	1	1	1	2	1	1	1	1	1	2	1	1	1	2	1	2	1	2	1	2	1	2	1	1
centro24P	Center	1	1	1	2	1	2	1	1	1	2	1	2	1	2	2	2	2	2	1	2	2	2	1	2	1	2	1	2	2	2	2	2	1	2	1	2	1	2	2	2	2	2	2	2	1	2	1	1
centro26P	Center	2	2	1	2	1	2	2	2	1	2	2	2	2	2	1	2	2	2	1	2	1	1	2	2	1	2	1	1	1	1	1	1	1	1	1	1	1	2	2	2	2	2	2	2	1	1	1	2
centro27P	Center	2	2	1	1	1	2	1	1	2	2	2	2	1	2	1	2	2	2	1	2	2	2	1	1	1	2	1	1	2	2	1	2	1	2	1	1	2	2	1	1	2	2	2	2	1	1	1	2
centro28P	Center	1	2	1	1	2	2	1	1	2	2	2	2	1	1	2	2	2	2	1	2	1	2	1	2	1	2	1	2	1	2	1	2	2	2	1	1	2	2	2	2	2	2	2	2	1	1	1	2
centro29P	Center	1	1	1	2	1	2	1	1	2	2	2	2	1	2	1	1	1	2	1	2	2	2	2	2	1	2	1	2	2	2	1	1	1	2	1	2	2	2	2	2	2	2	1	2	1	2	1	1
centro30P	Center	2	2	1	1	2	2	1	2	2	2	2	2	1	2	2	2	2	2	2	2	1	1	1	2	1	2	1	1	2	2	1	2	1	1	1	1	2	2	1	2	1	2	1	2	1	1	1	2
centro31P	Center	2	2	1	1	1	2	1	1	1	1	2	2	2	2	1	2	1	2	1	2	1	2	2	2	1	1	1	2	2	2	1	2	2	2	1	1	2	2	2	2	1	1	2	2	1	1	1	1
centro32P	Center	2	2	1	1	2	2	1	1	1	2	2	2	1	1	1	2	1	2	2	2	1	1	1	2	1	2	1	2	1	1	1	1	1	2	1	1	2	2	2	2	1	1	1	1	2	2	1	2
centro33P	Center	2	2	1	2	1	2	1	2	2	2	2	2	2	2	1	2	1	2	2	2	2	2	1	1	1	2	1	1	1	1	1	1	1	2	1	1	2	2	1	1	1	2	1	2	1	1	2	2
centro34P	Center	1	2	1	1	1	2	1	1	1	2	2	2	1	2	1	2	2	2	2	2	1	2	1	1	2	2	2	2	1	2	1	1	1	1	1	1	2	2	1	2	1	2	2	2	1	1	2	2
centro36P	Center	1	2	2	2	2	2	1	2	2	2	2	2	1	1	1	2	2	2	1	2	2	2	1	1	1	1	1	2	1	2	1	1	1	2	1	1	2	2	1	2	1	2	2	2	1	1	1	1
centro37P	Center	2	2	1	2	1	2	1	1	1	1	2	2	1	2	2	2	2	2	1	1	1	1	1	2	1	2	1	1	1	2	1	2	1	1	1	1	1	2	1	2	2	2	1	2	1	2	1	1
centro38P	Center	1	2	1	1	2	2	1	2	2	2	2	2	1	2	1	1	1	1	2	2	1	1	1	2	1	2	1	1	1	2	1	1	1	2	1	1	2	2	2	2	1	2	2	2	1	1	1	1
centro39P	Center	1	1	1	1	2	2	2	2	2	2	1	2	1	1	1	1	2	2	1	2	2	2	1	2	1	1	1	2	1	2	1	1	1	2	1	1	1	2	2	2	1	1	2	2	1	1	1	1
centro3P	Center	2	2	1	1	2	2	1	1	1	1	2	2	1	2	1	2	1	2	1	1	1	2	1	1	1	2	1	1	2	2	1	1	2	2	1	2	2	2	2	2	1	2	2	2	1	2	1	2
centro40P	Center	2	2	1	1	1	2	1	1	1	2	1	1	1	1	2	2	2	2	1	2	1	2	1	2	1	2	1	2	1	2	1	1	1	2	1	2	1	1	1	2	2	2	1	2	1	1	1	1
centro41P	Center	1	2	1	1	2	2	1	1	2	2	2	2	2	2	1	1	2	2	2	2	1	2	1	2	2	2	1	2	1	1	1	1	2	2	1	2	1	2	1	1	2	2	2	2	1	1	1	1
centro42P	Center	1	2	1	2	2	2	1	1	2	2	1	2	1	2	1	2	1	2	1	1	1	1	1	1	1	1	1	2	1	1	1	1	2	2	1	1	1	2	1	2	1	2	2	2	1	1	1	1
centro43P	Center	1	2	1	1	2	2	1	2	2	2	1	2	1	1	2	2	2	2	1	2	1	1	1	1	2	2	2	2	1	2	1	2	1	2	1	2	2	2	1	2	1	2	1	2	1	2	1	1
centro44P	Center	2	2	1	1	2	2	1	2	1	2	1	2	1	2	1	2	2	2	2	2	1	2	1	1	2	2	1	1	2	2	1	2	1	2	1	1	1	2	1	1	1	2	1	2	1	2	1	2
centro45P	Center	1	1	1	1	2	2	1	1	2	2	2	2	1	2	2	2	2	2	1	1	1	1	1	2	1	2	1	2	1	2	1	1	2	2	1	2	2	2	2	2	2	2	2	2	1	1	1	1
centro46P	Center	1	2	1	2	2	2	1	1	1	2	2	2	1	2	1	2	1	2	1	2	1	1	1	1	1	2	2	2	1	1	1	1	2	2	1	2	2	2	2	2	1	2	1	2	1	1	1	1
centro47P	Center	1	2	1	1	1	2	1	1	2	2	2	2	1	2	1	2	2	2	2	2	1	2	1	2	1	1	1	2	2	2	1	2	1	1	1	1	2	2	1	2	1	2	2	2	2	2	1	2
centro48P	Center	2	2	1	2	1	2	1	2	2	2	2	2	1	1	1	2	1	2	1	2	2	2	1	1	1	2	1	1	2	2	1	2	1	2	1	1	2	2	1	2	2	2	2	2	1	1	1	2
centro49P	Center	1	2	2	2	1	2	1	1	2	2	2	2	1	1	1	2	1	2	1	1	2	2	1	1	1	1	1	2	2	2	1	1	2	2	1	2	2	2	1	1	1	2	1	1	1	1	1	2
centro4P	Center	2	2	1	1	1	2	1	2	1	2	2	2	1	2	1	2	2	2	2	2	1	2	1	2	1	2	1	2	1	2	1	1	1	2	1	1	2	2	1	2	2	2	2	2	1	1	1	1
centro50P	Center	2	2	1	1	2	2	1	2	1	2	2	2	2	2	2	2	2	2	2	2	1	2	1	2	2	2	1	2	1	1	1	1	1	2	1	1	2	2	1	1	2	2	2	2	1	1	1	2
centro51P	Center	1	2	1	2	1	2	1	1	1	1	1	2	1	2	1	2	2	2	1	2	1	2	1	2	1	2	2	2	1	2	1	1	1	2	1	2	1	2	1	1	1	2	2	2	1	2	1	1
centro53P	Center	1	2	1	1	2	2	1	2	1	2	2	2	1	2	1	2	2	2	2	2	2	2	1	1	1	2	1	2	1	2	1	1	2	2	1	2	2	2	1	2	2	2	2	2	1	2	1	1
centro54P	Center	1	2	1	2	2	2	1	2	1	2	1	2	1	1	2	2	2	2	2	2	1	2	1	1	2	2	1	2	2	2	1	1	2	2	1	1	1	2	2	2	1	1	1	2	1	2	1	1
centro55P	Center	2	2	1	1	1	2	1	1	1	1	2	2	1	1	1	2	1	2	1	1	1	2	1	1	2	2	1	2	1	2	1	2	1	2	1	1	1	2	2	2	1	2	1	2	1	1	1	2
centro56P	Center	2	2	1	1	1	2	2	2	1	2	2	2	1	2	1	1	2	2	2	2	1	2	1	2	1	2	1	2	2	2	1	1	1	2	1	2	2	2	1	1	2	2	2	2	1	2	2	2
centro59P	Center	1	2	1	1	1	2	1	2	2	2	2	2	1	1	2	2	2	2	1	1	1	2	1	1	1	1	1	2	2	2	1	1	2	2	1	2	2	2	1	2	2	2	2	2	2	2	1	2
centro5P	Center	1	2	1	1	2	2	1	1	2	2	1	2	1	1	2	2	2	2	1	1	1	2	1	1	1	2	1	1	2	2	1	1	1	2	1	1	1	2	2	2	1	1	1	1	1	1	1	1
centro62P	Center	1	2	1	2	1	1	1	2	2	2	1	2	1	2	1	2	2	2	1	2	2	2	1	2	1	1	1	2	1	2	1	2	1	2	1	1	1	2	1	2	1	2	1	2	1	1	2	2
centro6P	Center	1	2	1	1	2	2	2	2	1	2	1	2	1	2	1	1	1	2	1	2	1	1	1	1	1	2	1	2	2	2	2	2	1	1	1	2	1	2	1	2	2	2	1	2	1	2	2	2
centro73P	Center	2	2	1	1	1	2	1	2	1	1	2	2	2	2	2	2	1	1	2	2	1	1	1	2	1	2	1	1	1	2	1	2	2	2	1	2	2	2	1	2	1	2	1	2	1	1	2	2
centro8P	Center	1	2	2	2	2	2	2	2	1	1	1	1	2	2	2	2	1	1	2	2	1	1	1	2	1	2	2	2	1	2	2	2	2	2	1	2	1	2	2	2	2	2	1	2	1	1	1	2
centro9P	Center	1	2	1	1	2	2	1	2	2	2	1	2	1	1	1	2	2	2	1	2	2	2	1	1	1	2	1	1	2	2	1	1	2	2	1	1	1	2	2	2	1	1	2	2	1	2	1	1
cmf6398	Center	2	2	1	1	1	2	1	2	2	2	2	2	1	1	1	1	2	2	1	2	2	2	1	2	1	2	2	2	2	2	1	1	1	2	1	2	2	2	1	2	1	2	2	2	1	2	1	2
cmf6442	Center	1	2	1	1	2	2	1	1	1	2	2	2	2	2	1	1	1	2	1	2	1	2	1	2	1	1	2	2	2	2	1	1	1	2	1	1	2	2	1	1	1	2	1	2	1	1	1	2
cmf6593	Center	1	1	1	1	1	2	1	2	1	2	1	2	1	2	1	1	2	2	1	2	2	2	1	1	1	2	1	2	1	2	1	2	2	2	1	1	1	2	2	2	1	2	2	2	1	2	2	2
Copes	Center	2	2	1	1	1	2	1	1	2	2	2	2	1	2	1	1	1	2	1	1	1	2	1	1	1	2	1	2	2	2	1	1	2	2	1	1	2	2	2	2	1	1	1	2	1	1	2	2
croce	Center	2	2	1	2	1	2	1	1	2	2	2	2	1	1	1	2	2	2	1	2	1	2	1	1	1	1	1	1	2	2	1	1	2	2	1	1	2	2	1	1	1	2	1	2	1	1	1	2
enciso	Center	2	2	1	1	2	2	1	1	2	2	2	2	1	2	1	1	2	2	1	2	1	2	1	1	1	2	2	2	1	1	1	1	2	2	1	2	2	2	1	2	1	2	1	2	1	2	1	1
feletti	Center	1	1	1	2	1	2	1	1	2	2	2	2	1	1	1	2	2	2	1	2	2	2	1	1	2	2	1	2	2	2	1	1	2	2	1	2	2	2	1	2	1	2	1	1	1	1	1	2
fontana	Center	1	2	1	1	1	2	1	1	1	1	1	2	1	1	2	2	1	1	1	2	2	2	1	1	1	1	1	2	1	2	1	1	1	2	1	1	1	2	1	2	1	1	1	1	1	1	2	2
gala	Center	1	2	1	2	1	2	1	1	2	2	2	2	1	2	1	2	1	2	1	2	1	2	1	2	1	2	2	2	2	2	1	2	2	2	1	2	2	2	1	2	1	2	1	2	1	2	1	2
gallonestor	Center	2	2	1	2	2	2	1	1	2	2	2	2	1	1	2	2	2	2	1	1	1	2	1	2	1	1	2	2	2	2	1	2	1	2	2	2	2	2	2	2	2	2	2	2	1	2	1	1
garcia	Center	2	2	1	1	2	2	1	2	1	1	2	2	1	2	1	2	2	2	2	2	1	1	2	2	1	2	1	1	1	2	1	1	1	2	1	1	2	2	1	2	2	2	1	2	1	1	1	1
gutierrez	Center	2	2	1	1	1	1	1	1	1	1	2	2	1	2	1	1	1	2	1	1	1	2	1	1	1	1	2	2	1	2	1	1	1	2	1	1	2	2	1	2	1	2	2	2	1	1	1	1
lezcano	Center	1	1	1	2	1	2	2	2	2	2	2	2	1	2	1	1	2	2	2	2	1	2	1	2	1	2	1	2	1	2	1	1	1	2	2	2	2	2	2	2	1	2	1	2	1	1	1	2
lozina	Center	1	2	1	1	1	2	1	1	1	2	2	2	1	2	2	2	1	1	1	2	1	2	1	1	1	2	1	2	2	2	1	1	2	2	1	2	2	2	1	2	1	2	1	2	1	1	1	1
mancini	Center	1	2	1	2	1	2	1	1	2	2	1	2	1	2	1	1	2	2	2	2	1	2	1	1	1	1	2	2	1	2	1	1	2	2	1	1	1	1	2	2	1	2	1	2	1	1	1	2
marozzi	Center	1	1	1	2	1	2	1	1	2	2	2	2	1	2	2	2	1	1	1	1	1	1	1	2	1	1	1	2	1	2	1	2	2	2	1	1	2	2	2	2	1	2	2	2	1	1	1	2
mayo	Center	1	2	1	1	2	2	1	1	2	2	2	2	2	2	2	2	2	2	1	2	1	1	1	1	1	2	1	1	1	2	1	2	2	2	1	1	2	2	1	1	2	2	2	2	1	2	1	2
Merlo	Center	2	2	1	2	2	2	1	2	2	2	2	2	1	2	1	1	2	2	1	1	2	2	1	2	1	2	1	1	1	2	1	1	1	2	1	2	2	2	1	1	1	1	2	2	1	1	1	2
nunez	Center	2	2	1	1	2	2	1	2	2	2	2	2	2	2	1	2	2	2	1	2	1	1	1	2	1	1	2	2	2	2	2	2	1	2	1	1	2	2	1	1	1	1	1	2	1	1	1	1
ostertag	Center	2	2	1	1	2	2	1	1	2	2	2	2	1	1	1	2	2	2	1	2	1	2	1	1	2	2	1	2	1	1	1	1	1	2	1	2	2	2	1	2	1	2	1	2	1	1	1	1
perino	Center	2	2	1	1	1	1	1	1	1	2	2	2	1	1	1	2	1	2	1	2	2	2	1	2	1	1	1	2	2	2	1	2	2	2	1	1	2	2	1	2	2	2	1	2	1	2	1	1
reisin	Center	2	2	1	1	1	1	1	2	1	2	2	2	1	1	1	2	1	2	1	2	2	2	1	1	1	1	2	2	1	2	2	2	2	2	1	1	2	2	2	2	1	1	2	2	1	2	2	2
rioscristian	Center	1	2	1	1	1	2	1	1	2	2	2	2	1	2	1	2	2	2	2	2	1	2	1	2	1	1	1	2	1	2	1	2	1	1	1	1	2	2	1	2	1	2	2	2	2	2	1	2
rodriguezm	Center	1	1	1	2	2	2	1	2	2	2	1	2	1	2	1	1	2	2	2	2	1	1	1	2	1	1	1	2	2	2	1	1	2	2	1	2	1	2	1	2	2	2	2	2	1	2	2	2
slavin	Center	2	2	1	1	2	2	1	1	1	1	2	2	2	2	1	1	2	2	1	1	1	2	1	1	1	2	2	2	2	2	1	1	1	1	1	2	2	2	2	2	1	2	2	2	1	2	1	1
urña	Center	1	2	1	1	2	2	1	1	2	2	2	2	1	2	1	2	1	1	1	1	2	2	1	1	1	2	2	2	1	2	1	1	1	2	2	2	2	2	2	2	1	2	1	1	1	1	1	1
Vargaso	Center	2	2	1	2	1	2	1	1	1	2	2	2	1	2	1	2	2	2	1	2	1	1	1	1	1	1	1	2	2	2	1	1	1	2	1	1	2	2	2	2	2	2	1	2	1	2	1	2
zambl	Center	2	2	1	1	2	2	1	1	2	2	1	1	2	2	1	1	1	2	2	2	1	2	2	2	1	1	1	1	1	1	1	2	1	2	1	1	1	1	1	1	2	2	2	2	1	2	1	1
9255	South	1	2	1	1	1	2	1	1	2	2	2	2	1	1	1	2	1	1	2	2	1	1	1	1	1	2	1	1	2	2	1	1	2	2	1	1	2	2	1	2	2	2	2	2	1	2	1	1
8975II	South	2	2	1	1	1	1	1	1	2	2	2	2	2	2	2	2	2	2	1	2	2	2	1	2	1	2	2	2	2	2	1	1	2	2	2	2	2	2	2	2	1	1	1	1	1	1	1	1
9253II	South	1	2	1	1	1	2	1	1	2	2	2	2	2	2	1	2	1	2	2	2	1	2	1	2	1	2	1	1	2	2	1	2	2	2	1	2	2	2	1	2	2	2	2	2	1	2	1	1
9622II	South	1	2	1	1	1	2	1	2	2	2	2	2	1	2	1	2	2	2	1	2	1	2	1	2	1	2	2	2	1	2	1	2	1	2	1	1	2	2	1	2	1	1	1	2	1	1	1	1
a4435	South	2	2	1	2	1	1	1	2	2	2	2	2	2	2	1	1	2	2	1	2	2	2	1	2	1	2	1	1	2	2	1	1	1	2	1	2	2	2	1	2	2	2	1	2	1	1	1	1
a4476	South	2	2	1	2	2	2	1	1	1	2	2	2	1	2	2	2	2	2	1	2	1	2	1	1	1	1	1	2	2	2	1	2	2	2	1	1	2	2	1	2	2	2	1	1	1	1	1	1
a5406	South	2	2	2	2	2	2	1	1	1	2	1	2	1	1	1	2	2	2	1	1	1	2	1	1	1	2	1	2	1	2	1	1	1	1	1	2	1	2	2	2	1	2	2	2	1	1	1	1
a5681	South	2	2	2	2	1	2	2	2	2	2	2	2	1	2	1	2	1	2	1	2	2	2	1	1	2	2	1	1	2	2	1	1	1	1	1	2	1	2	1	1	1	2	2	2	1	1	1	2
a5884	South	2	2	1	1	2	2	1	2	2	2	2	2	1	2	1	1	2	2	1	1	1	2	1	2	1	1	1	2	1	1	1	1	2	2	1	1	2	2	2	2	2	2	1	2	1	1	2	2
a5906	South	2	2	2	2	1	2	1	1	1	2	2	2	1	1	2	2	2	2	1	2	1	2	1	1	1	1	1	1	1	2	1	1	1	2	1	2	2	2	1	2	2	2	1	2	1	2	1	1
a5907	South	2	2	1	2	1	2	1	2	2	2	2	2	1	2	1	2	2	2	1	2	1	2	1	1	1	1	1	2	1	2	1	1	2	2	1	1	1	2	1	2	2	2	1	2	1	1	1	1
m1	South	2	2	1	1	1	1	1	2	1	2	2	2	2	2	1	1	1	2	1	2	1	2	1	1	1	2	1	1	1	2	1	2	2	2	1	1	2	2	1	2	1	2	1	2	1	1	1	1
m2	South	1	2	1	2	2	2	1	2	1	1	2	2	1	1	1	2	2	2	1	2	1	1	2	2	1	2	1	1	1	2	1	1	2	2	1	1	2	2	1	2	2	2	2	2	1	2	1	1
m3	South	2	2	1	1	1	2	1	2	2	2	2	2	1	2	1	1	1	2	2	2	1	1	1	1	1	1	1	1	1	2	1	2	1	2	1	1	2	2	1	2	2	2	2	2	1	1	1	2
montiel	South	2	2	1	1	1	2	2	2	1	2	2	2	2	2	1	2	2	2	1	2	1	1	1	1	1	2	1	2	1	1	1	1	2	2	1	1	2	2	1	2	2	2	2	2	1	1	1	2
riquelme	South	2	2	1	1	1	2	1	1	1	2	2	2	1	2	1	2	2	2	1	2	1	1	1	2	1	1	2	2	2	2	1	1	1	2	1	2	2	2	1	1	1	2	1	2	1	2	1	1
sur131P	South	2	2	1	1	2	2	1	1	2	2	2	2	2	2	1	1	1	2	1	2	1	1	1	1	1	2	1	2	1	2	1	1	2	2	1	1	2	2	1	2	2	2	1	1	2	2	1	1
sur132P	South	2	2	1	2	2	2	1	2	1	2	2	2	2	2	1	2	2	2	2	2	1	1	1	1	1	2	1	2	1	2	1	1	2	2	1	1	2	2	1	1	1	2	2	2	1	1	1	1
sur133P	South	2	2	1	1	2	2	1	1	1	1	0	0	2	2	1	1	2	2	1	1	1	2	1	1	1	1	1	2	1	2	1	2	1	2	1	1	2	2	1	2	1	2	1	2	1	1	1	1
sur134P	South	1	2	1	2	2	2	1	2	1	2	2	2	1	1	2	2	2	2	1	2	1	2	1	1	1	1	1	1	1	2	1	1	1	2	1	2	2	2	2	2	1	2	1	2	1	1	1	1
sur135P	South	1	2	1	1	1	2	1	2	1	2	2	2	2	2	1	1	2	2	1	2	1	2	1	1	1	2	1	1	1	2	1	1	1	1	1	2	1	2	1	1	2	2	2	2	1	1	2	2
sur136P	South	1	1	1	1	2	2	1	1	1	2	2	2	1	2	1	2	2	2	1	1	1	1	1	2	2	2	1	2	1	2	1	1	1	1	1	1	2	2	1	2	1	1	2	2	1	1	1	1
sur138P	South	1	2	1	1	2	2	1	1	2	2	1	2	1	2	1	2	2	2	1	2	2	2	1	1	2	2	1	2	1	2	1	1	1	2	1	1	1	2	2	2	1	2	2	2	1	1	1	2
sur139P	South	2	2	1	2	2	2	1	1	1	1	2	2	1	2	1	2	2	2	2	2	1	2	1	1	1	2	1	2	2	2	1	1	1	1	1	1	2	2	2	2	2	2	2	2	1	1	1	2
sur167P	South	2	2	1	2	2	2	1	1	2	2	2	2	2	2	2	2	1	2	2	2	2	2	1	1	1	1	1	2	1	2	1	1	1	2	1	1	2	2	1	1	2	2	1	2	1	1	1	2
SUR173P	South	2	2	1	1	2	2	1	2	2	2	2	2	1	2	1	2	2	2	2	2	1	2	1	2	1	2	1	2	1	1	1	1	2	2	1	2	2	2	1	2	2	2	2	2	1	1	1	2
sur176P	South	2	2	1	2	1	2	1	1	2	2	2	2	1	2	2	2	1	2	1	2	2	2	1	1	1	2	1	1	1	1	1	2	1	2	1	1	2	2	1	1	1	2	1	2	1	2	1	2
sur178P	South	1	2	1	1	1	2	1	2	1	2	1	2	1	2	1	1	2	2	2	2	1	1	1	1	1	2	1	2	1	1	1	1	2	2	1	1	1	2	1	1	1	2	1	2	1	1	1	2
sur179P	South	1	1	1	2	2	2	1	1	1	1	1	1	2	2	2	2	1	2	1	2	1	2	1	1	2	2	2	2	1	2	1	2	2	2	1	1	2	2	1	2	2	2	2	2	1	2	1	1
sur182P	South	1	1	1	1	2	2	1	2	1	2	2	2	2	2	1	2	2	2	2	2	1	1	1	1	1	1	1	1	2	2	1	1	1	2	1	1	2	2	1	2	1	2	2	2	1	2	1	1
sur184P	South	1	2	1	2	1	2	2	2	2	2	2	2	1	2	1	2	1	2	2	2	1	2	1	1	1	1	1	1	2	2	1	2	1	2	1	1	2	2	1	1	1	2	1	2	1	2	1	2
sur188P	South	1	2	1	2	1	2	1	2	2	2	2	2	1	2	1	2	2	2	1	1	1	2	1	2	1	2	1	2	1	1	1	1	1	2	1	2	2	2	1	1	1	2	1	2	1	1	1	2
sur189P	South	1	2	1	1	2	2	1	1	2	2	2	2	2	2	1	2	2	2	2	2	2	2	1	2	1	1	2	2	1	2	1	1	2	2	1	2	2	2	1	2	2	2	2	2	1	1	1	2
sur191P	South	1	2	1	2	1	1	1	2	1	2	2	2	2	2	1	2	2	2	1	2	1	2	1	1	1	2	2	2	2	2	1	2	2	2	1	1	2	2	1	1	2	2	2	2	1	2	1	2
sur193P	South	2	2	1	1	2	2	1	2	2	2	2	2	1	2	1	2	1	2	1	2	1	1	2	2	1	2	1	2	2	2	1	2	2	2	1	2	2	2	1	2	2	2	1	2	1	1	1	1
sur196P	South	2	2	1	2	2	2	1	1	1	2	1	2	1	2	1	1	2	2	1	2	1	1	1	2	1	2	2	2	2	2	1	1	1	2	1	1	1	2	2	2	1	2	1	2	1	1	1	1
sur198P	South	2	2	1	1	1	2	1	1	1	2	2	2	1	2	1	2	2	2	1	2	1	1	1	1	1	1	1	2	1	2	1	2	1	2	1	1	1	2	1	2	2	2	2	2	1	1	2	2
sur199P	South	1	2	1	1	1	2	1	1	2	2	1	2	1	2	1	2	1	2	1	1	2	2	1	1	1	2	2	2	2	2	1	2	1	2	1	2	1	2	1	2	1	2	2	2	1	2	2	2
sur200P	South	2	2	1	1	2	2	1	1	1	2	1	2	1	2	1	1	1	2	2	2	2	2	1	2	1	2	1	1	2	2	1	1	1	2	1	1	2	2	1	2	1	2	2	2	1	1	1	2
sur25P	South	1	2	1	1	1	2	1	2	2	2	1	2	1	1	1	2	2	2	1	1	1	2	1	1	1	1	1	2	2	2	1	2	2	2	1	1	1	2	2	2	1	1	2	2	2	2	1	2
sur57P	South	1	2	1	2	2	2	1	2	2	2	1	2	1	2	2	2	2	2	2	2	1	2	1	1	1	1	1	1	2	2	1	1	2	2	1	1	1	2	1	1	1	2	1	2	1	1	2	2
sur7P	South	2	2	1	1	1	1	1	2	2	2	1	1	1	1	2	2	2	2	1	2	1	1	1	2	1	2	1	1	2	2	1	1	2	2	1	1	2	2	1	2	2	2	2	2	1	1	1	1
vergara	South	1	2	1	2	1	2	2	2	2	2	1	1	1	2	1	1	1	2	2	2	1	2	1	1	1	1	0	0	1	2	1	1	2	2	1	2	1	1	1	1	1	2	2	2	1	1	1	2
williams	South	2	2	1	2	2	2	1	1	2	2	1	2	1	1	1	2	2	2	1	2	1	2	1	2	1	2	1	2	1	2	1	1	1	1	1	1	1	2	1	2	1	2	1	2	1	2	1	1
zunigam	South	2	2	1	2	2	2	1	2	1	2	2	2	1	2	1	2	2	2	2	2	1	1	1	1	1	2	1	2	1	2	1	2	1	1	1	1	2	2	1	2	2	2	2	2	1	1	1	1
[truncated: 12 more columns]

## Sheet: X-INDEL
		MID_2047	MID_3712	MID_357	MID_356	MID_3780	MID_448804	MID_3703	MID_218	MID_3774	MID_3705	MID_3706	MID_304737	MID_3692	MID_1445	MID_2694	MID_2657	MID_1326	MID_2610	MID_2600	MID_184	MID_19147	MID_3754	MID_3756	MID_1705	MID_3764	MID_284601	MID_103547	MID_193	MID_358	MID_3763	MID_3728	MID_1540	MID_2652
AFRA-09	African	1	2	2	1	2	2	1	1	1	1	2	1	1	1	1	2	1	2	1	1	1	2	2	2	1	2	2	0	2	0	1	2	1
AFRA-14	African	1	2	2	1	2	2	2	2	1	1	2	1	2	1	1	2	2	1	1	2	2	1	2	2	1	2	2	2	2	1	2	2	2
AFRA-15	African	2	1	2	1	2	2	1	1	2	1	2	1	1	1	1	2	2	2	1	2	2	2	2	2	1	2	2	2	1	1	1	2	1
AFRa-18	African	2	2	2	2	2	2	2	1	2	1	2	1	2	0	1	2	2	2	2	2	2	1	2	1	1	2	2	2	2	1	2	2	2
AFRA-19	African	2	2	2	2	2	2	1	1	1	2	1	2	1	1	1	2	2	1	1	2	1	2	2	1	0	2	2	2	1	1	2	2	2
AFRA-29	African	2	1	2	1	2	2	2	2	2	2	1	1	2	1	1	2	2	2	1	1	1	2	2	2	1	0	0	2	2	2	2	2	1
AFRa-32	African	2	1	2	1	2	1	2	2	1	1	2	1	2	1	1	2	1	2	2	2	1	2	2	2	2	2	2	2	1	1	2	2	2
AFRA-33	African	2	2	2	1	2	2	2	2	2	1	2	1	1	2	1	2	2	2	0	2	1	2	2	1	1	2	1	2	2	1	2	2	2
AFRA-35	African	2	2	2	1	2	2	1	2	1	1	2	1	2	1	1	2	2	2	2	2	1	2	2	2	1	2	2	2	2	1	1	2	2
AFRA-36	African	1	1	2	2	2	2	2	2	1	1	2	1	1	1	2	2	1	1	0	2	1	2	2	1	1	2	2	2	2	1	2	2	2
AFRA-37	African	1	2	2	2	2	2	2	2	2	1	2	1	1	1	1	2	2	1	1	1	1	1	2	2	1	0	2	2	2	2	1	2	2
AFRA-46	African	1	1	2	2	2	1	2	2	1	2	1	1	2	1	1	2	1	2	0	1	1	2	2	2	1	2	2	2	1	1	2	2	2
AFRA-47	African	1	2	2	2	2	1	2	2	1	1	2	1	2	1	2	2	1	1	2	2	1	2	2	1	1	2	2	2	2	1	1	2	1
AFRAF-04	African	1	2	2	2	2	2	2	1	1	1	2	1	1	1	2	2	2	1	1	2	1	2	2	2	1	2	2	2	2	1	2	2	2
AFRAF-114	African	1	1	2	2	2	2	2	2	1	2	1	2	1	1	2	2	2	2	1	2	1	1	2	2	1	2	2	2	2	1	1	2	2
AFRaf-30	African	2	2	2	1	2	2	1	1	2	1	2	1	1	1	1	1	2	1	2	2	1	1	2	1	1	2	2	2	2	1	2	2	2
AFRaf-38	African	1	2	2	1	2	2	2	2	1	1	2	2	2	2	1	2	2	1	2	1	1	2	2	1	1	2	2	1	1	1	2	2	2
AFRAF-403	African	1	2	2	2	2	1	2	2	1	1	2	1	2	1	2	2	2	2	2	2	1	1	2	2	1	2	2	2	2	2	1	2	2
AFRAF-406	African	2	2	2	1	2	2	2	2	1	1	2	2	2	1	2	2	1	2	1	1	1	2	2	1	1	2	2	2	1	1	2	2	2
AFRAF-407	African	1	2	2	1	2	2	2	2	1	1	2	1	2	1	2	2	2	2	1	2	1	1	2	1	2	2	2	2	1	1	2	2	1
AFRAF-408	African	2	2	1	1	1	2	2	2	1	1	2	1	1	1	1	2	1	2	1	2	1	2	2	2	1	1	2	2	2	1	2	2	1
AFRAF-409	African	1	2	1	1	1	2	2	2	1	1	2	1	2	1	1	2	1	2	2	2	1	1	2	2	1	2	2	2	2	1	2	2	1
AFRAF415	African	1	1	2	2	2	2	2	2	2	2	1	2	2	1	1	2	2	1	1	2	2	2	2	2	1	2	2	2	2	1	2	2	2
AFRAF-417	African	1	2	2	2	2	2	2	2	1	1	1	1	1	1	1	2	2	2	1	2	1	1	2	1	1	2	2	2	1	1	2	2	1
AFRAF-419	African	2	2	1	1	1	2	2	1	2	1	1	1	1	1	2	2	2	1	2	2	1	1	2	1	1	2	2	2	2	1	2	2	2
AFRAF-420	African	1	2	2	2	2	2	2	2	1	1	1	1	1	1	1	2	1	2	2	2	1	1	2	1	1	1	2	2	2	1	2	2	2
AFRAF-423	African	1	2	1	2	1	2	2	1	2	1	2	1	1	1	1	2	2	2	2	2	2	2	2	1	1	2	2	2	1	2	1	2	1
AFRAF425	African	2	1	2	1	2	2	2	2	1	1	2	1	2	1	1	2	2	2	2	2	1	1	2	2	1	2	2	2	1	1	2	2	2
AFRAF-426	African	1	2	2	2	2	2	2	2	2	1	2	1	2	1	2	2	2	2	1	2	1	2	2	1	1	2	2	2	1	1	2	2	2
AFRAF-427	African	1	1	2	1	2	2	2	2	2	2	1	1	1	1	1	2	2	1	1	2	1	1	2	2	1	2	2	2	1	1	2	2	1
AFRAF-429	African	2	2	1	1	1	1	2	1	1	1	2	2	1	1	1	2	2	2	1	2	1	1	2	1	1	2	2	2	2	2	1	2	2
AFRAF-44	African	2	2	1	1	1	2	2	1	2	2	2	2	2	1	1	2	2	1	2	2	1	2	2	2	1	2	2	2	2	1	1	2	2
AFRAF-49	African	2	2	2	2	2	2	2	1	2	1	2	2	1	1	1	2	1	1	1	2	1	2	2	1	1	2	2	2	2	2	2	2	1
AFRAF-64	African	1	2	2	1	2	2	1	1	2	1	1	1	2	1	1	2	1	1	2	2	2	2	2	1	1	2	2	2	2	1	2	2	2
AFRaf-69	African	1	1	1	2	1	1	2	1	1	1	2	1	1	1	2	2	2	1	1	2	1	1	2	1	1	2	2	2	2	2	2	2	1
AFRAF73	African	2	1	2	1	2	2	2	1	1	1	2	1	2	1	1	2	2	1	1	2	2	1	2	2	1	1	2	2	1	1	2	2	1
AFRAF74	African	2	2	2	2	2	2	2	1	2	2	1	2	2	1	1	2	2	1	2	2	1	1	2	2	1	2	2	2	2	1	2	2	2
AFRAF-80	African	1	2	1	1	1	2	2	1	2	1	2	1	1	1	1	2	2	2	1	2	1	2	2	1	1	2	2	2	2	1	2	2	2
AFRAF-81	African	1	1	2	1	2	2	2	2	1	1	2	1	1	2	1	2	2	2	1	2	1	1	2	2	1	2	2	2	2	1	2	2	2
AFRAF-82	African	2	2	2	2	2	2	2	1	2	2	1	2	1	1	1	2	1	2	1	2	2	1	2	2	1	2	2	2	2	1	2	2	2
AFRAF-93	African	1	1	2	1	1	2	2	2	1	2	1	2	1	1	2	2	1	1	2	2	1	2	2	1	1	2	2	2	1	1	2	2	2
AFRAF-94	African	2	1	2	2	2	1	2	2	2	1	2	1	1	1	1	2	1	1	2	2	1	2	2	1	1	1	2	2	2	1	2	2	1
AFRc-501	African	1	2	2	1	2	2	2	2	1	2	1	2	2	1	1	2	2	2	1	2	1	1	2	1	1	2	2	2	1	1	2	2	1
AFRc-503	African	2	2	2	1	2	2	2	1	1	1	2	1	1	1	1	2	2	1	1	2	1	1	2	1	1	2	2	2	2	1	2	2	2
AFRC-504	African	2	1	1	2	1	2	2	2	2	1	2	2	2	1	1	2	2	2	1	2	2	1	2	1	1	1	2	2	2	1	2	2	1
AFRC-506	African	1	2	2	1	2	2	2	2	2	1	2	2	1	1	2	2	2	1	1	1	1	1	2	2	1	2	2	2	1	1	2	2	2
AFRC-507	African	1	2	1	1	1	2	1	2	1	2	1	1	1	1	1	2	1	1	1	2	2	2	2	1	1	2	2	2	1	1	2	2	1
AFRC-509	African	2	2	2	1	2	2	2	2	1	2	1	1	2	1	1	2	1	2	2	2	1	1	2	1	2	2	2	2	1	1	2	2	2
AFRC-510	African	1	2	2	1	2	1	2	2	1	2	1	2	2	1	1	2	1	1	1	2	1	1	2	1	1	2	2	2	1	1	2	2	1
AFRC-512	African	1	2	1	1	1	2	1	1	2	1	2	2	1	1	1	2	2	2	1	2	1	2	2	2	1	2	2	2	2	1	2	2	2
AFRC-513	African	2	2	2	1	2	2	2	1	2	1	2	1	2	1	1	2	1	1	1	2	2	2	2	1	1	2	2	2	2	1	2	2	2
AFRc-514	African	1	2	1	1	1	2	2	2	2	1	2	2	2	1	2	2	1	1	1	2	1	2	2	1	1	2	2	2	2	1	2	2	2
AFRc-515	African	2	2	1	2	1	2	2	2	2	1	2	1	1	1	1	2	2	2	1	2	1	1	1	1	1	2	2	2	2	2	2	2	1
AFRc-517	African	2	1	2	2	2	2	2	2	2	1	2	1	2	1	2	2	1	2	2	2	1	2	2	1	1	2	2	2	2	2	2	2	2
AFRc-518	African	1	2	2	1	2	2	2	2	2	1	2	2	1	1	1	2	2	2	1	2	1	2	2	2	1	1	2	2	2	1	1	2	2
AFRC-519	African	1	2	2	2	2	1	2	2	1	1	2	1	1	1	2	2	2	2	1	1	1	1	2	1	1	2	2	2	2	1	2	2	2
AFRc-520	African	1	2	2	1	2	2	2	2	1	1	2	1	1	1	1	1	2	2	2	2	2	1	2	1	1	2	2	2	1	1	2	2	1
AFRc-523	African	1	2	2	1	2	2	2	2	1	2	1	2	2	1	1	2	1	2	1	2	2	2	2	1	1	2	2	2	1	1	2	2	2
AFRC-526	African	2	2	2	2	2	1	2	2	1	1	2	1	1	1	1	2	2	1	2	2	1	2	2	1	2	2	2	2	2	2	2	2	2
AFRC-528	African	1	1	2	2	2	2	2	2	2	2	1	1	2	1	2	2	2	2	2	2	1	1	2	2	1	2	2	2	1	1	2	2	2
AFRC-529	African	1	2	2	2	2	2	2	1	1	1	2	1	2	1	1	2	1	1	1	2	1	1	2	1	1	2	2	2	2	2	1	2	2
AFRC-530	African	1	2	2	2	2	1	2	2	1	1	2	1	1	1	1	2	2	2	2	2	2	1	2	1	1	2	2	2	1	1	2	2	2
AFRc-532	African	1	1	2	2	2	2	2	2	2	1	2	1	1	1	1	2	2	2	1	1	2	1	2	1	1	2	2	2	2	1	2	2	2
AFRC-533	African	1	2	2	1	2	2	2	2	2	2	1	2	1	1	1	2	1	1	1	1	1	2	2	1	1	2	2	2	1	1	2	2	2
AFRC-534	African	2	2	1	2	1	2	2	2	2	1	2	1	1	2	2	2	2	1	1	2	1	2	2	2	1	2	2	2	1	1	2	2	1
AFRC-535	African	1	1	2	2	2	2	2	2	1	1	2	2	2	1	1	2	1	2	1	2	1	2	2	2	1	2	2	2	1	1	2	2	2
AFRCM-101	African	1	2	2	2	2	2	2	2	1	1	2	1	1	1	2	2	2	2	1	2	1	1	2	1	1	2	2	2	1	1	2	2	2
AFRCM-104	African	2	2	2	1	2	2	2	2	1	1	2	1	1	1	1	2	2	1	1	2	1	1	2	1	1	2	2	2	2	2	2	2	2
AFRCM-110	African	1	1	2	2	2	2	2	1	2	2	2	1	2	1	1	2	2	1	1	2	2	2	2	1	1	2	2	2	1	1	2	2	2
AFRCM-112	African	1	2	1	2	1	2	1	1	1	1	1	2	1	1	1	2	2	1	2	2	1	1	2	1	1	2	2	2	1	1	2	2	2
AFRCM-118	African	2	1	2	1	2	2	2	2	1	1	2	1	1	1	1	2	1	1	1	1	1	2	2	1	1	2	2	2	2	2	1	2	2
AFRcm-121	African	2	2	2	1	2	2	2	2	2	1	2	1	2	1	1	1	2	2	1	2	1	2	2	1	1	2	2	2	2	2	1	2	1
AFRcm-140	African	2	1	2	1	2	2	2	2	1	1	2	1	2	1	1	2	1	1	2	2	1	1	2	1	2	2	2	2	2	1	1	2	2
AFRcm-142	African	1	2	2	1	2	2	2	2	1	1	2	1	2	1	1	2	2	2	2	2	1	1	2	1	1	2	2	2	1	1	2	2	2
AFRCM-168	African	2	1	2	2	2	2	2	2	1	1	2	2	2	1	2	2	2	1	2	2	1	2	2	2	1	2	2	2	2	1	2	2	1
AFRCM-17	African	1	2	1	1	1	2	1	1	2	1	1	1	1	1	1	2	1	2	2	2	1	1	2	2	1	2	2	2	2	1	1	2	1
AFRCM-27	African	2	2	2	2	2	2	2	2	1	1	2	1	2	1	1	2	2	2	1	2	2	2	2	2	1	2	2	2	2	1	2	2	2
AFRCM-63	African	2	2	1	1	1	1	2	1	2	1	1	2	1	1	1	2	2	1	1	2	1	1	2	2	2	2	2	2	2	1	2	2	2
AFRCM-68	African	2	2	2	2	2	1	2	1	1	1	1	1	1	1	1	2	1	1	1	2	1	2	2	2	2	2	2	2	1	1	2	2	1
AFRcm-91	African	2	2	2	2	2	2	2	2	2	2	1	1	1	1	1	2	2	2	2	2	1	1	2	2	1	2	2	2	1	1	2	2	1
AFRcm-93	African	2	2	2	1	2	2	1	1	2	1	2	2	1	1	1	2	2	2	2	1	1	2	2	1	1	2	2	2	2	1	1	2	2
AFRCM-94	African	2	1	2	1	2	2	2	2	2	1	2	1	1	1	2	2	2	2	2	2	1	1	2	1	1	1	2	2	2	1	2	2	1
AFRCM-95	African	2	2	2	2	2	2	2	2	2	1	2	1	2	1	2	2	2	2	2	2	1	1	2	1	1	2	2	2	1	1	2	2	1
AFRKA001	African	2	1	2	2	2	2	1	1	1	1	2	1	2	2	1	2	2	1	0	2	2	1	2	1	1	2	2	2	2	2	1	2	1
AFRKA-002	African	2	2	1	2	1	2	2	2	2	1	2	1	1	1	1	2	2	1	2	2	1	2	2	1	1	2	2	2	2	1	1	2	1
AFRKA-005	African	2	2	2	1	2	2	2	2	2	1	1	2	1	1	1	2	2	1	2	2	1	2	2	2	1	2	2	2	2	2	1	2	1
AFRka-013	African	2	1	2	2	2	2	2	2	1	1	2	2	2	1	1	2	2	1	2	2	2	1	2	1	1	2	1	2	2	2	1	2	2
AFRKA-018	African	2	2	2	2	2	2	1	1	1	1	1	1	1	1	2	2	2	1	1	2	1	2	2	1	2	2	2	2	2	2	2	2	2
AFRka-040	African	2	2	2	2	2	2	1	1	2	1	1	2	2	1	1	2	2	1	1	2	1	1	2	1	1	2	2	2	2	1	2	2	1
AFRka-043	African	2	2	2	2	2	2	2	1	1	1	2	1	2	1	1	2	2	1	2	1	2	1	2	1	1	2	2	2	2	2	1	2	1
AFRKA-049	African	2	2	2	2	2	2	2	2	1	1	2	1	2	2	1	2	2	1	2	2	1	2	2	1	1	2	2	2	2	2	2	2	2
AFRka-085	African	2	2	2	2	2	1	1	2	1	1	1	2	2	1	1	2	2	1	2	2	1	1	2	2	1	2	2	2	2	1	1	2	2
AFRKA089	African	2	1	2	1	2	2	1	2	2	1	2	1	2	2	1	2	2	1	2	2	2	1	2	1	2	2	2	2	2	2	1	2	1
AFRka090	African	1	1	1	1	1	2	2	2	1	1	1	2	2	1	1	2	2	2	2	1	2	2	2	1	1	2	2	2	2	1	1	2	2
AFRKA-094	African	2	2	1	2	1	2	1	2	1	1	2	2	2	1	2	2	1	1	2	2	1	2	2	1	1	2	2	2	2	1	2	2	1
AFRKA-129	African	1	2	2	2	2	2	2	2	1	1	2	1	2	1	2	2	2	1	2	1	2	2	2	1	1	2	2	2	1	1	2	2	2
AFRKA139	African	2	1	2	2	2	2	1	1	1	1	2	1	1	1	2	2	2	2	2	2	2	2	2	2	2	2	2	2	2	1	1	2	2
AFRka-145	African	2	1	1	1	1	2	2	1	2	1	2	1	2	1	1	2	2	1	2	1	2	2	2	1	2	2	2	2	2	2	2	2	1
AFRka-152	African	1	2	2	1	2	2	2	2	2	2	1	2	1	1	2	2	1	1	0	2	2	2	2	1	1	2	2	2	2	1	1	2	1
AFRKA-156	African	1	2	2	2	2	2	2	2	1	1	2	1	2	1	1	2	2	2	1	2	1	2	2	1	1	2	2	2	2	1	2	2	2
AFRka-157	African	2	1	2	2	2	1	2	1	2	1	2	1	2	1	1	2	1	1	2	1	2	2	2	1	1	2	2	2	2	1	2	2	2
AFRz-253	African	2	1	2	2	2	2	2	2	1	1	2	1	1	1	2	2	1	1	2	2	1	2	2	1	1	2	2	2	2	1	2	2	2
AFRz-255	African	2	2	2	1	2	2	2	2	1	1	2	2	2	2	2	2	1	1	1	1	1	2	2	1	2	2	2	2	2	1	2	2	1
AFRz-256	African	2	1	2	2	2	2	2	1	2	1	1	1	2	1	1	2	1	2	2	2	2	1	2	1	1	2	2	2	1	1	1	2	2
AFRz-260	African	2	2	2	1	2	2	2	2	1	1	2	1	2	2	1	2	2	1	1	2	1	2	2	2	1	1	2	2	2	1	2	2	2
AFRz-265	African	1	2	2	1	2	2	1	1	2	2	1	1	2	1	1	2	1	2	2	2	1	1	2	1	1	2	2	2	2	1	2	2	1
AFRZ-268	African	2	1	2	2	2	2	2	2	1	2	1	2	1	2	1	2	2	2	2	2	1	1	2	1	1	2	2	2	1	1	1	2	2
AFRz-321	African	2	2	2	2	2	2	2	2	2	1	2	2	2	1	2	2	2	2	1	2	1	1	2	1	1	2	2	2	1	1	2	2	2
AF-X01	African	1	1	2	2	2	2	2	2	2	1	2	1	2	1	2	1	1	2	1	2	1	1	2	1	1	2	2	2	2	2	2	1	2
AF-X05	African	2	1	2	2	1	2	2	2	2	1	2	1	2	1	1	2	1	1	1	1	1	1	2	2	1	2	2	2	1	1	2	1	2
AF-X06	African	2	1	2	2	1	2	2	2	2	1	2	2	1	1	1	2	1	1	1	2	1	2	2	1	1	2	2	2	1	1	2	1	2
AF-X08	African	1	1	2	2	2	2	2	2	2	1	2	2	2	1	1	2	1	2	1	2	1	1	2	1	1	2	2	2	2	1	2	2	2
AF-X09	African	2	2	2	2	2	2	2	2	2	1	2	2	2	1	1	2	1	2	2	1	1	2	2	1	1	2	2	2	2	1	1	1	2
AF-X10	African	2	1	2	2	1	2	2	2	2	1	2	2	1	1	1	2	2	2	1	2	2	1	2	1	1	2	2	2	2	2	2	1	2
AF-X11	African	1	1	2	2	1	1	2	1	2	1	2	1	2	1	1	2	2	1	2	2	2	2	2	2	1	2	2	1	2	1	2	2	2
AF-X12	African	2	2	2	2	2	1	2	2	1	2	1	1	2	1	1	2	1	1	2	2	1	2	2	1	1	2	2	2	2	1	2	2	2
AF-X13	African	2	1	2	2	2	1	2	2	1	1	2	2	1	1	1	2	1	2	2	2	1	1	2	2	1	2	2	2	2	1	2	1	2
AF-X14	African	1	1	2	2	2	1	2	2	2	1	2	1	1	1	2	2	1	2	2	1	2	1	2	1	1	2	2	2	2	1	2	1	2
AF-X15	African	2	1	2	2	1	2	2	2	2	1	2	1	1	1	2	2	2	2	1	2	1	2	2	2	1	2	2	2	1	2	1	1	2
AF-X16	African	1	1	2	2	2	2	2	2	2	2	2	1	1	2	2	2	2	1	2	2	1	1	2	2	1	2	2	2	2	1	1	2	2
AF-X18	African	2	2	2	2	1	2	2	2	1	1	2	2	1	2	1	2	1	1	2	2	1	2	2	2	1	2	2	2	1	1	2	2	2
AF-X19	African	1	2	1	1	1	2	2	2	2	1	2	1	1	1	1	2	1	1	1	1	1	1	2	2	1	2	2	2	2	1	2	1	2
AF-X20	African	2	1	2	1	1	2	1	1	2	1	1	1	1	1	1	2	2	1	1	2	1	2	2	1	1	2	2	2	2	1	2	2	2
AF-X21	African	1	2	2	2	1	2	2	2	2	1	2	2	1	1	1	2	1	2	2	1	2	1	2	2	1	2	2	2	2	1	1	2	2
AF-X22	African	1	2	1	1	2	2	2	1	2	1	2	1	2	1	2	2	1	1	2	2	2	2	0	1	1	2	2	2	2	1	1	1	2
AF-X23	African	2	2	2	2	2	2	2	2	2	1	2	2	1	2	2	2	1	2	1	2	1	2	2	1	1	2	2	2	2	1	1	1	2
AF-X24	African	1	1	2	2	2	1	2	2	2	1	2	2	2	1	1	2	1	1	2	2	1	2	2	1	1	2	2	2	2	1	2	1	2
AF-X25	African	2	2	2	2	1	2	2	2	2	1	0	1	2	1	1	2	2	1	2	2	1	1	2	1	1	2	2	2	2	1	2	1	2
AF-X27	African	1	1	2	2	2	1	2	2	1	1	2	1	2	1	1	2	2	2	2	2	1	2	2	2	1	2	2	2	2	1	2	1	2
AF-X28	African	1	2	2	2	1	2	2	2	2	1	2	1	1	1	1	2	2	1	2	1	1	2	2	2	1	2	2	2	2	2	2	2	2
AF-X29	African	1	2	2	2	2	2	1	1	2	1	2	1	2	1	1	2	1	1	2	2	2	2	2	1	1	2	2	2	1	1	1	2	2
AF-X30	African	2	1	2	2	2	2	1	1	2	1	2	1	1	1	1	2	1	1	1	1	1	2	2	1	1	2	2	2	1	2	1	2	2
AF-X31	African	2	1	1	1	2	2	2	2	2	2	1	2	1	1	1	1	1	1	1	2	2	1	2	2	1	2	2	2	2	1	1	2	2
AF-X32	African	1	2	2	2	2	1	2	2	2	1	2	2	1	1	1	2	1	2	2	2	2	1	2	2	1	2	2	2	2	1	1	1	2
AF-X34	African	1	1	2	2	1	1	1	1	2	1	0	1	2	1	1	2	2	1	1	1	1	1	2	2	1	2	2	2	2	1	1	1	2
AF-X35	African	1	2	2	2	2	1	2	2	1	2	2	0	1	1	1	2	2	1	1	2	1	2	2	1	1	2	2	2	1	1	2	1	2
AF-X37	African	2	1	2	2	2	1	2	2	1	1	2	1	1	1	2	2	1	1	1	1	1	2	2	1	1	2	2	2	2	1	2	2	2
AF-X38	African	1	2	2	2	1	1	1	1	1	1	2	0	0	1	2	2	2	1	1	2	1	1	2	1	1	2	2	2	2	2	1	1	2
AF-X39	African	2	2	2	2	1	1	2	2	1	1	2	1	2	1	1	2	2	1	2	2	1	1	2	2	1	2	2	2	1	1	2	2	2
AF-X40	African	2	1	2	2	1	2	2	2	1	1	2	2	1	1	2	1	2	1	1	2	1	1	2	1	1	2	2	2	1	1	2	1	2
AF-X41	African	1	1	2	2	1	2	2	2	2	1	2	1	2	1	1	2	1	2	1	2	1	2	2	2	1	2	2	2	1	1	1	1	2
AF-X42	African	2	1	2	2	1	1	2	2	2	1	2	1	2	1	1	2	2	2	2	2	1	1	2	2	1	2	2	2	1	1	2	1	2
AF-X44	African	1	1	2	2	2	1	2	2	2	2	1	1	2	1	2	2	1	1	1	2	1	1	2	2	1	2	2	2	2	1	1	1	2
AF-X46	African	1	1	1	1	1	2	2	2	2	1	2	1	2	1	2	2	2	1	2	2	1	1	2	2	2	2	2	2	2	1	2	1	2
AF-X48	African	1	2	2	2	1	2	2	2	2	1	1	2	1	2	1	2	2	1	2	2	2	1	2	2	1	2	2	2	2	1	1	1	2
AF-X49	African	2	1	2	2	2	2	2	2	2	1	2	1	2	2	2	2	1	2	1	2	2	1	2	2	1	2	2	2	1	1	2	2	2
AF-X50	African	2	2	2	2	2	1	2	2	2	1	2	2	2	1	1	1	1	1	1	1	1	2	2	1	1	2	2	2	1	1	2	1	2
AF-X51	African	2	1	2	2	1	1	2	2	2	1	2	2	1	1	1	2	1	2	1	2	2	1	1	1	1	2	2	2	2	2	2	1	2
AF-X52	African	2	1	2	2	2	2	2	1	2	1	2	1	2	1	2	2	2	2	1	2	1	1	2	1	1	2	2	2	2	2	2	1	2
AF-X53	African	1	2	2	2	2	2	2	1	2	1	2	1	1	2	1	2	1	1	1	1	1	1	2	1	2	2	2	2	2	2	1	2	2
AF-X55	African	1	2	2	2	1	1	2	2	2	1	2	1	2	1	1	2	2	2	2	1	1	1	2	1	1	2	2	2	1	1	2	2	2
AF-X56	African	1	2	2	2	2	2	2	2	2	2	2	2	2	2	1	2	0	1	2	2	1	1	2	2	1	2	2	1	2	1	2	1	2
AF-X58	African	2	1	2	2	2	1	2	2	1	1	2	1	1	2	2	2	1	2	2	2	1	1	2	1	1	2	2	2	2	1	1	2	2
AF-X59	African	2	1	1	1	1	2	2	2	1	1	2	2	2	1	1	2	1	2	1	2	2	1	2	1	1	2	2	2	2	1	2	2	2
AF-X60	African	2	2	2	2	1	2	2	2	2	1	2	2	2	1	1	2	1	2	1	1	1	2	2	1	1	2	2	2	1	1	2	2	2
AF-X61	African	2	1	2	2	2	2	2	1	2	1	2	1	2	1	1	2	1	2	2	2	1	2	2	2	1	2	2	2	1	1	2	2	2
AF-X63	African	1	2	2	2	2	1	2	2	1	2	1	2	2	1	1	1	2	2	1	2	1	2	2	1	1	2	2	2	2	1	2	1	2
AF-X65	African	1	1	2	2	1	1	2	2	2	1	2	1	1	1	1	2	2	1	2	1	1	2	2	1	1	2	2	2	2	1	1	2	2
AF-X66	African	1	1	2	2	1	2	2	2	2	1	2	1	2	2	2	2	2	2	1	2	1	1	2	2	1	2	2	2	2	1	2	1	2
AF-X67	African	1	2	1	1	1	2	1	2	2	1	2	2	2	1	1	2	1	1	1	2	1	1	2	2	1	2	2	2	2	1	1	1	2
AF-X68	African	2	1	2	2	2	2	2	2	2	1	2	1	2	1	2	2	2	1	1	2	1	2	2	1	2	2	2	2	2	2	1	1	2
AF-X69	African	1	2	2	2	1	2	1	1	2	1	2	1	2	1	1	2	1	1	2	2	2	1	2	2	1	2	2	2	1	1	2	1	2
AF-X70	African	2	2	2	2	2	1	2	2	1	1	2	1	2	1	2	2	1	2	1	2	1	2	2	2	1	2	2	2	2	2	1	1	2
EURC114	European	2	2	1	2	1	2	2	1	2	2	1	2	2	1	2	2	1	2	2	2	1	2	2	2	2	2	2	2	1	2	1	1	1
EURC115	European	1	2	2	2	2	1	2	1	2	2	1	2	2	1	2	2	1	2	2	1	1	2	2	2	1	2	2	2	1	2	1	1	1
EURCC100	European	2	2	2	2	2	2	2	1	2	2	1	2	2	1	2	2	1	2	2	1	1	1	2	2	1	2	2	2	1	2	1	1	1
EURCC101	European	2	2	1	2	1	1	2	2	2	2	1	2	2	1	2	2	2	2	2	1	1	2	1	2	2	2	2	2	1	2	1	2	1
EURCC102	European	2	2	2	2	2	2	1	1	2	2	1	2	2	1	2	2	2	2	2	2	2	1	2	2	1	2	2	1	2	2	1	1	1
EURCC103	European	2	2	1	1	1	2	1	1	1	2	1	2	2	2	2	2	2	2	2	2	1	2	2	2	2	2	2	2	1	2	1	1	1
EURCC104	European	2	2	2	2	2	2	1	1	2	2	1	2	2	1	2	2	2	2	2	2	1	2	2	2	1	2	2	2	1	2	2	2	1
EURCC111	European	2	2	2	2	2	2	1	1	2	2	1	2	2	2	2	2	1	2	2	2	1	2	1	2	1	2	2	2	1	2	1	1	1
EURCC113	European	2	2	1	2	1	1	2	1	2	2	1	2	2	1	2	2	1	2	2	1	1	2	2	2	1	2	2	2	1	2	1	2	1
EURCC117	European	2	1	2	2	2	1	1	1	2	2	1	2	2	1	2	2	2	2	2	1	1	2	1	2	1	2	2	2	1	2	1	1	1
EURCC12	European	2	2	2	2	2	1	1	1	2	2	1	2	2	1	1	2	1	2	2	2	1	1	1	1	1	2	2	2	1	2	1	1	1
EURCC14	European	2	1	2	2	2	2	1	1	2	2	1	2	2	1	2	2	1	2	2	2	1	2	1	1	2	2	2	2	2	2	1	2	2
EURCC15	European	2	2	2	2	2	1	2	2	2	2	1	2	2	1	2	2	2	2	2	1	1	2	2	2	1	2	2	2	1	2	1	2	1
EURCC16	European	2	1	1	2	1	2	2	1	2	2	1	2	1	1	2	2	2	2	2	2	1	1	1	2	2	2	1	2	1	2	1	2	1
EURCC17	European	2	1	2	2	2	1	2	2	1	2	1	2	2	2	2	2	1	2	2	2	1	2	2	2	1	2	2	2	2	2	1	1	1
EURCC18	European	2	2	2	2	2	2	2	2	1	2	1	2	2	1	2	2	1	2	2	1	1	2	1	1	1	2	2	2	1	2	1	2	1
EURCC20	European	2	2	2	2	2	1	1	1	2	2	1	2	2	1	1	2	2	2	2	1	1	2	2	2	1	2	2	2	1	2	2	2	1
EURCC22	European	1	2	2	1	2	2	2	2	1	2	1	2	2	1	2	2	2	2	2	1	1	2	1	2	1	2	2	2	1	2	1	2	1
EURCC23	European	2	2	2	1	2	2	2	2	2	2	1	2	2	1	2	2	2	2	2	2	2	2	1	2	1	2	2	2	1	2	1	2	1
EURCC26	European	2	2	2	2	1	1	2	1	2	2	1	2	2	1	1	2	2	2	2	2	1	2	1	1	1	2	2	1	1	2	1	1	1
EURCC29	European	1	2	1	2	1	2	2	1	2	2	1	2	2	1	2	2	2	2	2	1	1	2	2	2	1	2	2	2	1	2	1	2	1
EURCC30	European	2	2	2	2	2	2	2	1	2	2	1	2	2	1	2	2	2	2	2	1	1	1	2	2	2	1	1	2	1	2	1	2	1
EURCC31	European	1	2	1	2	1	2	1	1	2	2	1	2	1	1	2	2	1	2	2	1	1	2	2	2	2	2	2	2	2	1	1	2	2
EURCC32	European	2	2	2	2	2	2	1	1	2	2	1	2	2	1	2	2	2	2	2	2	1	1	1	2	1	2	2	2	1	2	1	2	1
EURCC34	European	2	1	1	2	1	2	2	1	2	2	1	2	2	1	2	2	2	2	1	2	1	2	1	2	1	2	2	2	1	2	1	1	1
EURCC35	European	2	2	2	2	2	1	2	1	2	2	1	2	2	1	2	2	2	2	2	1	1	2	1	2	1	2	2	1	1	2	1	1	1
EURCC36	European	1	2	1	1	1	2	1	1	2	2	1	2	2	1	2	2	2	2	2	2	1	1	1	2	1	2	2	2	1	2	1	2	2
EURCC37	European	2	2	1	2	1	1	2	2	1	2	1	2	2	1	2	2	2	2	2	2	1	2	1	2	1	2	2	2	1	2	1	1	1
EURCC39	European	1	2	2	2	2	2	1	1	2	2	1	2	2	2	2	2	2	1	2	1	1	2	1	2	1	2	2	2	2	2	1	2	1
EURCC4	European	2	2	1	2	1	1	2	1	2	2	1	2	2	1	2	2	2	2	2	1	1	2	2	2	1	2	2	2	1	2	1	1	1
EURCC40	European	2	1	2	2	2	1	2	1	2	2	1	2	2	1	2	2	1	2	2	2	1	2	1	2	1	2	2	2	2	1	1	2	1
EURCC41	European	2	2	2	2	2	2	2	2	1	2	1	2	2	2	2	2	2	2	2	2	2	1	2	2	1	2	2	1	1	2	1	1	1
EURCC42	European	1	2	1	2	1	2	2	1	2	2	1	2	2	1	2	2	1	2	2	1	2	2	2	2	1	2	2	2	1	2	1	1	1
EURCC43	European	2	2	2	2	2	1	2	1	2	2	1	2	2	1	2	2	1	2	2	1	1	1	2	2	1	2	2	2	1	2	1	2	2
EURCC44	European	1	2	2	2	2	2	2	1	2	2	1	2	2	1	2	2	2	2	2	1	1	2	1	1	1	2	2	1	1	2	1	2	2
EURCC45	European	2	2	2	2	2	1	2	2	2	2	1	2	2	1	2	2	2	2	2	2	1	2	2	2	1	2	2	2	1	2	1	2	1
EURCC46	European	2	2	2	2	2	1	1	1	2	2	1	2	2	1	2	2	1	2	1	1	2	1	2	2	1	2	2	2	1	2	1	2	2
EURCC5	European	2	2	2	2	2	2	2	1	2	2	1	2	2	1	2	2	2	2	2	1	1	2	2	2	1	2	2	2	1	2	1	2	1
EURCC50	European	2	2	2	2	2	2	2	2	1	2	1	2	2	1	2	2	2	2	2	1	1	2	1	2	1	2	2	1	1	2	2	2	1
EURCC51	European	2	2	1	2	1	2	2	1	2	2	1	2	2	1	2	2	2	2	2	2	2	2	2	2	1	1	1	2	1	2	1	1	1
EURCC52	European	2	1	1	2	1	1	1	1	2	2	1	2	2	1	2	2	2	2	2	2	1	2	1	2	1	2	2	2	1	2	1	1	1
EURCC54	European	1	2	2	2	2	2	2	1	2	2	1	2	2	2	2	2	2	2	2	2	2	2	2	2	1	1	1	2	1	2	1	1	2
EURCC56	European	2	2	2	2	2	2	2	1	2	2	1	2	2	2	2	2	1	2	2	2	2	1	2	2	2	2	2	1	1	2	1	1	2
EURCC6	European	2	2	2	2	2	1	2	2	1	2	1	2	2	1	2	2	1	2	2	2	1	2	1	2	1	2	2	2	1	2	1	2	2
EURCC61	European	2	1	2	2	2	2	1	1	2	2	1	2	2	2	2	2	2	2	2	2	1	2	2	2	1	2	2	2	1	2	1	2	1
EURCC64	European	2	2	1	2	1	2	2	1	2	2	1	2	2	1	2	2	2	2	2	1	2	1	2	2	2	2	2	2	1	1	2	2	1
EURCC65	European	2	2	2	2	2	1	2	2	2	2	1	2	2	2	2	2	2	2	1	2	1	2	1	2	1	2	2	1	2	2	1	1	1
EURCC67	European	1	2	2	2	2	1	2	1	2	2	1	2	2	1	2	2	2	2	2	2	1	2	2	2	1	2	2	2	1	2	1	1	2
EURCC7	European	1	2	2	2	2	1	2	1	2	2	1	2	1	1	1	2	1	2	2	1	1	2	2	2	1	2	2	2	1	2	1	2	2
EURCC76	European	2	2	2	2	2	1	1	1	2	2	1	2	2	1	2	2	2	2	2	2	1	2	1	2	1	2	2	2	2	2	1	2	2
EURCC8	European	2	2	2	2	2	1	2	1	2	2	1	2	2	1	2	2	2	2	2	1	1	2	1	2	1	2	2	2	1	2	1	2	1
EURCC83	European	2	1	1	2	1	1	1	1	2	2	1	2	1	1	2	2	2	2	2	1	1	1	2	2	1	2	2	2	1	2	1	1	1
EURCC84	European	2	2	2	2	2	1	2	1	2	2	1	2	2	1	2	2	2	2	2	1	1	2	2	2	2	2	2	1	1	2	2	1	2
EURCC85	European	1	2	2	2	2	1	1	1	2	2	1	2	2	2	2	2	2	2	2	1	1	2	2	2	1	2	2	1	1	2	1	2	1
EURCC88	European	1	2	2	2	2	1	1	1	2	2	1	2	2	1	2	2	2	2	2	2	1	2	2	2	1	2	2	2	1	2	1	1	1
EURCC91	European	2	2	2	2	2	1	1	1	2	2	1	2	2	1	2	2	2	2	2	1	1	2	1	2	1	2	2	2	1	2	1	2	2
EURM92	European	2	2	1	2	1	1	1	1	2	2	1	2	2	2	2	2	1	2	0	2	1	2	1	0	2	2	2	1	1	2	1	2	1
EURP102	European	1	2	2	2	2	1	2	1	2	2	1	2	2	1	2	2	2	2	2	1	1	2	1	2	1	1	1	1	1	1	2	1	1
EURP104	European	1	1	2	2	2	2	2	2	2	2	1	2	1	1	2	2	2	2	2	2	2	2	1	2	1	2	2	2	2	2	1	1	2
EURP105	European	2	2	2	2	2	2	1	1	2	2	1	2	2	1	2	2	2	2	2	2	1	2	1	1	1	1	1	2	1	1	2	2	1
EURP107	European	2	2	2	2	2	2	2	1	2	0	1	2	2	2	2	2	1	1	2	1	1	2	2	1	1	2	2	2	1	2	1	2	1
EURP113	European	1	1	2	2	2	2	2	2	2	2	1	2	1	1	2	2	2	2	2	1	1	2	1	2	2	2	2	2	1	2	1	2	1
EURP113.2	European	2	2	1	2	1	1	1	1	2	2	1	2	2	1	2	2	1	2	2	2	1	1	2	2	1	2	2	2	1	2	1	2	2
EURP119	European	2	2	2	2	2	2	2	1	2	2	1	2	2	1	2	2	2	2	2	1	1	1	1	2	1	2	2	1	1	2	1	2	2
EURP13	European	2	2	2	2	2	1	1	1	2	2	1	2	2	1	2	2	2	2	2	1	1	2	2	2	1	0	2	2	1	2	1	1	1
EURP16	European	2	2	1	2	1	1	2	1	2	2	1	2	1	1	2	2	1	2	2	1	1	2	2	2	1	2	2	2	1	2	1	2	1
EURP17	European	2	1	2	2	2	2	1	1	2	2	1	2	2	2	2	2	2	2	2	1	2	2	1	2	1	2	2	2	2	1	1	1	1
EURP30	European	2	1	2	2	2	1	2	1	2	2	1	2	2	1	2	2	1	2	2	2	1	2	1	2	1	0	2	2	1	2	1	2	2
EURP41	European	2	2	1	2	0	2	1	1	2	2	1	2	2	1	2	2	2	2	2	2	1	1	2	2	1	0	2	2	1	2	1	2	1
EURP43	European	2	1	2	2	2	2	2	1	2	2	1	2	2	2	2	2	2	2	2	2	1	2	1	2	2	1	1	2	2	1	1	1	1
EURP45	European	2	2	2	2	2	1	2	1	2	2	1	2	2	1	2	2	2	2	2	2	1	2	2	2	1	0	2	1	2	1	1	2	1
EURP56	European	2	2	2	2	2	1	1	1	2	2	1	2	1	1	2	2	2	2	2	2	2	2	1	2	1	2	2	2	0	2	1	2	1
EURP64	European	2	1	1	2	1	2	2	1	2	2	1	2	2	1	2	2	2	2	2	2	2	2	2	2	1	2	2	2	1	2	1	1	1
EURP66	European	1	2	1	2	1	1	2	1	2	2	1	2	1	1	2	2	2	2	2	2	1	2	2	2	1	2	2	1	0	2	1	2	2
EURP68	European	1	2	2	2	2	2	1	1	2	2	1	2	1	1	2	2	1	2	2	2	1	2	1	2	1	1	1	2	1	2	1	2	1
EURP69	European	2	2	2	2	2	1	1	1	2	2	1	2	1	2	2	2	2	2	2	2	2	2	1	2	1	2	2	2	1	2	1	1	1
EURP72	European	2	2	2	2	2	2	2	1	2	2	1	2	2	1	2	2	1	2	2	1	1	2	2	1	1	2	2	2	0	1	1	2	1
EURP75	European	1	2	1	2	1	2	2	1	2	2	1	2	2	1	2	2	1	2	2	1	2	2	1	2	1	2	2	1	2	2	1	2	1
EURP80	European	1	2	1	2	1	2	2	1	2	2	1	2	2	1	2	2	2	2	2	1	1	2	1	2	1	2	2	2	1	2	1	1	1
EURP87	European	2	2	2	2	2	1	2	1	2	2	1	2	2	1	2	2	2	2	2	2	1	2	1	2	1	2	2	2	2	1	1	2	1
EURP88	European	2	2	2	2	2	2	2	1	2	2	1	2	2	1	2	2	1	2	2	1	1	2	1	2	1	2	2	2	2	2	1	2	1
EURP89	European	2	2	2	2	2	2	1	1	2	2	1	2	2	1	2	2	2	2	2	2	1	2	1	2	1	2	2	1	1	2	1	2	1
EURP91	European	2	2	2	2	2	2	1	1	2	2	1	2	2	1	2	2	2	2	2	2	2	2	2	2	2	1	1	2	1	2	1	2	2
EURP96	European	2	2	2	2	2	1	2	1	2	2	1	2	2	1	2	2	2	2	2	2	1	1	1	2	1	1	1	2	1	2	1	1	2
EURP982	European	1	2	1	2	1	2	1	1	2	2	1	2	2	1	2	2	2	2	2	2	2	2	1	2	1	2	2	1	1	2	1	1	1
EURPORT-01	European	1	2	2	2	2	1	1	1	2	2	1	2	2	1	2	2	1	1	2	1	1	1	2	2	2	2	2	2	1	2	1	2	1
EURPORT-08	European	2	1	2	2	2	1	1	1	2	2	1	2	1	2	2	2	2	2	2	2	1	2	2	1	1	1	2	1	1	2	1	2	2
EURPORT-10	European	2	2	2	2	2	2	1	1	2	2	1	2	2	1	2	2	2	2	2	1	1	2	1	2	1	2	2	1	1	2	1	1	1
EURPORT-12	European	1	2	1	1	1	1	2	1	2	2	1	2	2	2	2	2	2	2	2	2	2	2	1	2	2	2	2	2	1	2	1	2	1
EURPORT-21	European	2	2	2	2	2	1	2	2	2	2	1	2	2	2	2	2	2	2	2	2	2	2	2	2	1	2	2	2	1	2	1	2	1
EURPORT-25	European	1	2	1	2	1	1	2	2	2	2	1	2	2	2	2	2	1	2	2	1	1	2	1	2	1	2	2	2	1	2	1	2	1
EURPORT-27	European	2	2	2	2	2	2	2	1	2	2	1	2	1	1	2	2	2	2	2	2	2	2	1	2	2	1	1	2	1	2	1	2	1
NAMAPT001	Native American	1	1	1	2	1	2	2	2	1	2	1	2	2	1	2	2	1	2	2	2	1	2	1	1	2	1	1	1	1	2	1	1	1
NAMAPT002	Native American	1	2	1	2	1	2	2	2	1	2	1	2	2	1	2	2	1	2	2	2	1	1	2	1	2	1	1	1	1	2	1	1	1
NAMAPT008	Native American	1	1	1	2	1	2	2	2	1	2	1	2	2	1	2	2	1	2	2	2	1	2	2	1	2	1	1	1	1	2	1	2	1
NAMAPT009	Native American	1	2	1	2	1	2	2	2	1	2	1	2	2	1	2	2	1	2	2	2	1	2	1	1	2	1	1	1	1	2	1	1	1
NAMARA007	Native American	1	2	2	2	2	1	2	1	2	2	1	2	2	1	2	2	1	2	2	2	1	1	2	1	2	1	1	1	1	2	1	1	1
NAMARA011	Native American	1	2	1	2	1	2	2	2	1	2	1	2	2	1	2	2	1	2	2	2	1	1	2	1	2	1	1	1	1	2	1	2	2
NAMARA014	Native American	1	2	1	2	1	2	2	2	1	2	1	2	2	1	2	2	1	2	2	2	1	1	1	1	2	1	1	1	1	2	1	2	1
NAMARA015	Native American	1	2	1	2	1	2	2	2	1	2	1	2	2	1	2	2	1	2	2	2	1	1	2	2	2	1	1	1	1	2	1	1	1
NAMARA024	Native American	1	2	1	2	1	1	2	2	1	2	1	2	2	1	2	2	1	2	2	2	1	1	1	1	2	1	1	1	1	2	1	2	1
NAMARA025	Native American	2	2	2	1	2	2	2	2	1	2	1	2	2	1	2	2	1	2	2	2	1	2	2	1	2	1	1	1	1	2	1	1	2
NAMARA027	Native American	1	2	1	2	1	2	2	2	1	2	1	2	2	1	2	2	1	2	2	2	1	1	1	2	2	1	1	1	1	2	1	1	1
NAMARA033	Native American	1	2	2	2	2	1	2	1	2	2	1	2	2	1	2	2	1	2	2	2	1	1	1	1	2	1	1	1	1	2	1	2	1
NAMAWA08	Native American	1	2	1	2	1	2	2	2	1	2	1	2	2	1	2	2	1	2	2	2	1	1	2	2	2	1	1	2	1	2	1	1	1
NAMAWA14	Native American	2	1	1	2	1	1	2	2	1	2	1	2	2	1	2	2	1	2	2	2	1	1	1	2	2	1	1	2	1	2	1	1	2
NAMAWA21	Native American	2	2	1	1	1	2	2	2	1	2	1	2	2	1	2	2	1	2	2	2	1	2	1	2	2	1	1	2	1	2	1	1	2
NAMAWA23	Native American	2	2	1	2	1	2	2	2	1	2	1	2	2	1	2	2	1	2	2	2	1	2	1	2	2	1	1	1	1	2	1	2	2
NAMAWA37	Native American	1	2	1	2	1	1	2	2	1	2	1	2	2	1	2	2	1	2	2	2	1	1	1	2	2	1	1	2	1	2	1	2	2
NAMAWA42	Native American	1	2	2	2	2	1	2	2	1	2	1	2	2	1	2	2	1	2	2	2	1	1	2	2	2	1	1	2	1	2	1	1	2
NAMAWA80	Native American	1	2	1	1	1	2	2	2	1	2	1	2	2	1	2	2	1	2	2	2	1	2	1	2	2	1	1	2	1	2	1	1	2
NAMAWE005	Native American	1	2	1	1	1	2	2	2	1	2	1	2	2	1	2	2	1	2	2	2	1	1	2	1	2	1	1	1	1	2	1	1	2
NAMAWE008	Native American	2	2	1	1	1	1	2	1	2	2	1	2	2	1	2	2	1	2	2	2	1	2	2	1	2	1	1	1	1	2	1	1	1
NAMAWE020	Native American	1	2	1	1	1	2	2	2	1	2	1	2	2	1	2	2	1	2	2	2	1	1	1	1	2	1	1	1	1	2	1	1	2
NAMAWE042	Native American	1	2	1	1	1	2	2	2	1	2	1	2	2	1	2	2	1	2	2	2	1	1	2	1	2	1	1	1	1	2	1	2	1
NAMAWE043	Native American	1	2	1	1	1	2	2	2	1	2	1	2	2	1	2	2	1	2	2	2	1	1	1	2	2	1	1	2	1	2	1	2	2
NAMAWE048	Native American	1	2	1	1	1	2	2	2	1	2	1	2	2	1	2	2	1	2	2	2	1	1	1	1	2	1	1	1	1	2	1	1	1
NAMAWE050	Native American	1	2	1	1	1	1	2	1	2	2	1	2	2	1	2	2	1	2	2	2	1	1	1	2	2	1	1	1	1	2	1	2	1
NAMAWE054	Native American	2	1	1	2	1	2	2	2	1	2	1	2	2	1	2	2	1	2	2	2	1	1	2	2	2	1	1	1	1	2	1	2	1
NAMAWE057	Native American	1	2	1	1	1	1	2	1	2	2	1	2	2	1	2	2	1	2	2	2	1	1	1	1	2	1	1	1	1	2	1	1	1
NAMAWE065	Native American	1	2	1	1	1	2	2	2	1	2	1	2	2	1	2	2	1	2	2	2	1	2	2	1	2	1	1	1	1	2	1	2	1
NAMAWG05	Native American	1	1	1	1	1	2	2	2	1	2	1	2	2	1	2	2	1	2	2	2	1	1	1	1	2	1	1	2	1	2	1	1	2
NAMAWG06	Native American	1	2	1	1	1	2	2	2	1	2	1	2	2	1	2	2	1	2	2	2	1	1	1	2	2	1	1	2	2	2	1	1	2
NAMAWG15	Native American	1	1	1	2	1	1	2	2	1	2	1	2	2	1	2	2	1	2	2	2	1	1	2	1	2	1	1	2	1	2	1	1	1
NAMAWG17	Native American	1	1	1	2	1	1	2	2	1	2	1	2	2	1	2	2	1	2	2	2	1	2	1	1	2	1	1	1	1	2	1	1	2
NAMAWG18	Native American	1	1	1	2	1	1	2	2	1	2	1	2	2	1	2	2	1	2	2	2	1	2	1	2	2	1	1	2	2	2	1	1	2
NAMAWG23	Native American	1	2	2	2	2	1	2	2	1	2	1	2	2	1	2	2	1	2	2	2	1	1	1	2	2	1	1	2	1	2	1	1	2
NAMAWG33	Native American	1	1	1	2	1	1	2	2	1	2	1	2	2	1	2	2	1	2	2	2	1	1	2	2	2	1	1	2	2	2	1	1	2
NAMAWG37	Native American	1	2	1	2	1	1	2	2	2	2	1	2	2	1	2	2	1	2	2	2	1	1	2	2	2	1	1	2	1	2	1	1	1
NAMAWG40	Native American	1	1	1	2	1	1	2	2	1	2	1	2	2	1	2	2	1	2	2	2	1	1	1	1	2	1	1	2	2	2	1	1	1
NAMIRI004	Native American	2	2	1	2	1	1	2	2	1	2	1	2	2	1	2	2	1	2	2	2	1	1	2	2	2	1	1	1	1	2	1	1	1
NAMIRI006	Native American	2	2	1	2	1	1	2	2	1	2	1	2	2	1	2	2	1	2	2	2	1	1	1	1	2	1	1	1	1	2	1	1	1
NAMIRI016	Native American	2	2	1	2	1	1	2	2	1	2	1	2	2	1	2	2	1	2	2	2	1	1	1	2	2	1	1	1	1	2	1	2	1
NAMIRI018	Native American	1	2	1	2	1	1	2	2	1	2	1	2	2	1	2	2	1	2	2	2	1	1	1	1	2	1	1	1	1	2	1	1	1
NAMIRI040	Native American	1	2	2	2	2	2	2	2	1	2	1	2	2	1	2	2	1	2	2	2	1	2	2	1	2	1	1	1	1	2	1	1	1
NAMIRI044	Native American	1	2	2	1	2	2	2	2	1	2	1	2	2	1	2	2	1	2	2	2	1	1	2	1	2	1	1	1	1	2	1	1	1
NAMIRI045	Native American	1	2	2	1	2	2	2	2	1	2	1	2	2	1	2	2	1	2	2	2	1	1	2	1	2	1	1	1	1	2	1	2	1
NAMIRI047	Native American	1	2	2	1	2	2	2	2	1	2	1	2	2	1	2	2	1	2	2	2	1	1	1	1	2	1	1	1	1	2	1	2	1
NAMIRI048	Native American	2	2	2	1	2	2	2	2	1	2	1	2	2	1	2	2	1	2	2	2	1	1	2	2	2	1	1	1	1	2	1	2	2
NAMKAA18	Native American	1	2	1	2	1	1	2	1	2	2	1	2	2	1	2	2	1	2	2	2	1	1	2	2	2	1	1	1	1	2	1	2	1
NAMKAA31	Native American	1	2	1	2	1	2	2	2	1	2	1	2	2	1	2	2	1	2	2	2	1	1	2	2	2	1	1	2	1	2	1	2	1
NAMKWT005	Native American	1	1	2	2	2	1	2	2	1	2	1	2	2	1	2	2	1	2	2	2	1	2	2	2	2	1	1	1	1	2	1	2	2
NAMKWT010	Native American	1	2	1	2	1	1	2	2	1	2	1	2	2	1	2	2	1	2	2	2	1	2	2	2	2	1	1	1	1	2	1	2	2
NAMKWT016	Native American	1	2	1	2	1	1	2	2	1	2	1	2	2	1	2	2	1	2	2	2	1	1	1	1	2	1	1	1	1	2	1	1	2
NAMKWT023	Native American	1	1	1	2	2	2	2	2	1	2	1	2	2	1	2	2	1	2	2	2	1	2	2	1	2	1	1	1	1	2	1	1	2
NAMKWT067	Native American	1	2	1	1	1	2	2	2	1	2	1	2	2	1	2	2	1	2	2	2	1	1	1	1	2	1	1	1	1	2	1	2	1
NAMKWT072	Native American	2	1	1	1	1	2	2	2	1	2	1	2	2	1	2	2	1	2	2	2	1	1	1	1	2	1	1	1	1	2	1	1	2
NAMKYI043	Native American	1	2	2	2	2	2	2	2	1	2	1	2	2	1	2	2	1	2	2	2	1	1	1	2	2	1	1	1	1	2	1	2	1
NAMKYI049	Native American	1	2	2	2	2	2	2	2	1	2	1	2	2	1	2	2	1	2	2	2	1	2	1	2	2	1	1	1	1	2	1	2	1
NAMKYI053	Native American	1	2	1	2	1	1	1	2	2	2	1	2	2	1	2	2	1	2	2	2	1	1	2	1	2	1	1	1	1	2	1	2	1
NAMKYI054	Native American	2	2	2	2	2	1	2	2	2	2	1	2	2	1	2	2	1	2	2	2	1	2	1	1	2	1	1	1	1	2	1	2	2
NAMKYI064	Native American	1	2	1	2	1	1	1	2	2	2	1	2	2	1	2	2	1	2	2	2	1	2	1	1	2	1	1	1	1	2	1	1	1
NAMKYI067	Native American	1	1	1	2	1	1	1	2	2	2	1	2	2	1	2	2	1	2	2	2	1	1	2	1	2	1	1	2	1	2	1	2	1
NAMKYI074	Native American	1	2	1	2	1	1	1	2	2	2	1	2	2	1	2	2	1	2	2	2	1	1	2	1	2	1	1	1	1	2	1	1	1
NAMKYI093	Native American	1	2	1	2	1	2	2	2	1	2	1	2	2	1	2	2	1	2	2	2	1	1	1	2	2	1	1	1	1	2	1	2	1
NAMKYI096	Native American	1	2	2	2	2	2	2	2	1	2	1	2	2	1	2	2	1	2	2	2	1	1	1	1	2	1	1	1	1	2	1	2	1
NAMKYI102	Native American	2	1	1	1	1	2	2	2	1	2	1	2	2	1	2	2	1	2	2	2	1	1	2	2	2	1	1	1	1	2	1	2	1
NAMKYI117	Native American	1	2	1	2	1	2	2	2	1	2	1	2	2	1	2	2	1	2	2	2	1	1	2	1	2	1	1	1	1	2	1	2	1
NAMPRK31	Native American	1	2	1	2	1	1	2	2	1	2	1	2	2	1	2	2	1	2	2	2	1	1	2	2	2	1	1	1	1	2	1	1	1
NAMPTJ05	Native American	2	2	2	2	2	1	2	2	1	2	1	2	2	1	2	2	1	2	2	2	1	2	2	2	2	1	1	1	1	2	1	1	1
NAMPTJ11	Native American	1	1	1	2	1	1	2	2	1	2	1	2	2	1	2	2	1	2	2	2	1	1	2	1	2	1	1	1	1	2	1	1	2
NAMPTJ21B	Native American	1	1	2	2	2	2	2	2	1	2	1	2	2	1	2	2	1	2	2	2	1	1	1	2	2	1	1	1	1	2	1	1	2
NAMPTJ24	Native American	1	1	1	2	1	1	2	2	1	2	1	2	2	1	2	2	1	2	2	2	1	1	2	2	2	1	1	2	1	2	1	1	2
NAMPTJ31B	Native American	1	2	2	2	2	1	2	2	1	2	1	2	2	1	2	2	1	2	2	2	1	1	1	2	2	1	1	1	1	2	1	1	1
NAMPTJ40	Native American	2	1	1	2	1	1	2	2	1	2	1	2	2	1	2	2	1	2	2	2	1	1	2	2	2	1	1	1	1	2	1	1	2
NAMPTJ50	Native American	1	1	2	2	2	2	2	2	1	2	1	2	2	1	2	2	1	2	2	2	1	1	1	1	2	1	1	1	1	2	1	1	2
NAMPTJ56	Native American	1	1	2	2	2	2	2	2	1	2	1	2	2	1	2	2	1	2	2	2	1	1	2	1	2	1	1	1	1	2	1	1	2
NAMPTJ57	Native American	1	2	1	2	1	1	1	2	1	2	1	2	2	1	2	2	1	2	2	2	1	1	1	2	2	1	1	1	1	2	1	1	1
NAMTYR05	Native American	2	2	1	2	1	2	1	2	1	2	1	2	2	1	2	2	1	2	2	2	1	2	2	1	2	1	1	1	1	2	1	1	1
NAMTYR10	Native American	2	2	1	2	1	2	1	2	1	2	1	2	2	1	2	2	1	2	2	2	1	2	1	2	2	1	1	1	1	2	1	1	2
NAMTYR115	Native American	1	2	2	2	2	1	2	2	2	2	1	2	2	1	2	2	1	2	2	2	1	2	1	2	2	1	1	1	1	2	1	2	1
NAMTYR119(02)	Native American	1	1	1	2	1	2	1	2	1	2	1	2	2	1	2	2	1	2	2	2	1	1	1	1	1	1	1	1	1	2	1	1	2
NAMTYR120	Native American	1	1	1	2	1	2	1	2	1	2	1	2	2	1	2	2	1	2	2	2	1	1	2	1	2	1	1	1	1	2	1	1	2
NAMTYR14	Native American	2	2	2	2	2	1	2	2	1	2	1	2	2	1	2	2	1	2	2	2	1	1	2	1	2	1	1	1	1	2	1	1	2
NAMTYR140	Native American	1	1	1	2	1	1	2	1	2	2	1	2	2	1	2	2	1	2	2	2	1	2	1	2	2	1	1	1	1	2	1	1	1
NAMTYR146	Native American	1	1	1	2	1	1	2	2	1	2	1	2	2	1	2	2	1	2	2	2	1	1	2	2	2	1	1	1	1	2	1	1	1
NAMTYR147	Native American	1	1	1	1	1	2	2	2	1	2	1	2	2	1	2	2	1	2	2	2	1	1	2	1	2	1	1	1	1	2	1	2	1
NAMTYR157	Native American	2	2	1	2	1	2	2	2	1	2	1	2	2	1	2	2	1	2	2	2	1	2	1	2	2	1	1	1	1	2	1	1	1
NAMTYR159	Native American	1	1	1	2	1	1	1	2	2	2	1	2	2	1	2	2	1	2	2	2	1	1	1	2	2	1	1	1	1	2	1	1	1
NAMTYR16	Native American	1	2	2	2	2	2	2	2	1	2	1	2	2	1	2	2	1	2	2	2	1	2	1	2	2	1	1	2	1	2	1	2	2
NAMTYR19	Native American	1	2	1	2	1	1	2	1	2	2	1	2	2	1	2	2	1	2	2	2	1	1	1	1	2	1	1	1	1	2	1	1	2
NAMTYR22	Native American	2	2	2	2	2	1	2	2	1	2	1	2	2	1	2	2	1	2	2	2	1	2	1	2	2	1	1	1	1	2	1	2	1
NAMTYR23	Native American	1	1	1	2	1	1	2	2	1	2	1	2	2	1	2	2	2	2	2	2	1	1	2	2	2	1	1	1	1	2	1	1	1
NAMTYR25	Native American	1	1	1	2	1	2	2	2	1	2	1	2	2	1	2	2	1	2	2	2	1	1	1	2	2	1	1	1	1	2	1	2	1
NAMTYR28	Native American	2	2	1	2	1	1	2	2	1	2	1	2	2	1	2	2	1	2	2	2	1	1	2	2	2	1	1	2	1	2	1	2	1
NAMTYR36	Native American	1	1	2	2	2	1	2	2	1	2	1	2	2	1	2	2	1	2	2	2	1	1	2	1	2	1	1	1	1	2	1	2	2
NAMTYR42	Native American	1	2	2	2	2	1	2	2	2	2	1	2	2	1	2	2	1	2	2	2	1	2	2	1	2	1	1	1	1	2	1	2	2
NAMTYR54	Native American	1	1	2	1	2	2	2	2	1	2	1	2	2	1	2	2	1	2	2	2	1	1	2	2	2	1	1	1	1	2	1	1	1
NAMTYR64	Native American	2	2	1	2	1	2	2	2	1	2	1	2	2	1	2	2	1	2	2	2	1	1	1	1	2	1	1	1	1	2	1	1	1
NAMTYR66	Native American	1	2	1	2	1	2	2	2	2	2	1	2	2	1	2	2	2	2	2	2	1	1	2	1	2	1	1	1	1	2	1	2	2
NAMTYR70	Native American	1	2	2	2	2	1	2	2	1	2	1	2	2	1	2	2	1	2	2	2	1	1	2	1	2	1	1	1	1	2	1	1	1
NAMTYR77	Native American	1	2	2	2	2	2	2	2	1	2	1	2	2	1	2	2	1	2	2	2	1	2	1	2	2	1	1	1	1	2	1	1	2
NAMTYR78	Native American	2	2	1	2	1	2	2	2	1	2	1	2	2	1	2	2	1	2	2	2	1	2	1	2	2	1	1	1	1	2	1	2	1
NAMTYR83	Native American	1	2	1	2	1	1	1	2	1	2	1	2	2	1	2	2	1	2	2	2	1	1	1	1	2	1	1	1	1	2	1	2	2
NAMTYR84	Native American	2	1	1	1	1	2	2	2	1	2	1	2	2	1	2	2	1	2	2	2	1	2	1	2	2	1	1	1	1	2	1	1	2
NAMTYR91	Native American	1	2	2	2	2	1	2	2	1	2	1	2	2	1	2	2	1	2	2	2	1	1	1	1	2	1	1	1	1	2	1	1	2
NAMTYR94	Native American	1	2	1	2	1	1	2	2	1	2	1	2	2	1	2	2	2	2	2	2	1	1	2	1	2	1	1	1	1	2	1	2	2
NAMTYR95	Native American	1	1	2	1	2	2	2	2	1	2	1	2	2	1	2	2	1	2	2	2	1	1	2	1	2	1	1	1	1	2	1	1	1
NAMURK01	Native American	1	2	1	1	1	2	2	2	1	2	1	2	2	1	2	2	1	2	2	2	1	1	2	1	2	1	1	1	1	2	1	1	1
NAMURK04	Native American	1	1	1	2	1	2	2	2	1	2	1	2	2	1	2	2	1	2	2	2	1	1	1	1	2	1	1	1	1	2	1	1	2
NAMURK06	Native American	1	1	1	2	1	2	2	2	1	2	1	2	2	1	2	2	1	2	2	2	1	1	1	1	2	1	1	1	1	2	1	1	1
NAMURK12	Native American	1	2	2	2	2	1	1	2	2	2	1	2	2	1	2	2	1	2	2	2	1	1	1	1	2	1	1	1	1	2	1	1	1
NAMURK13	Native American	1	2	1	2	1	2	2	2	1	2	1	2	2	1	2	2	1	2	2	2	1	1	2	2	2	1	1	2	1	2	1	1	2
NAMURK19	Native American	1	1	2	2	2	1	2	1	2	2	1	2	2	1	2	2	1	2	2	2	1	1	1	2	2	1	1	1	1	2	1	2	1
NAMURK26	Native American	1	2	1	2	1	2	2	2	1	2	1	2	2	1	2	2	1	2	2	2	1	1	1	2	2	1	1	2	1	2	1	1	2
NAMURK38	Native American	1	1	2	2	2	1	2	2	1	2	1	2	2	1	2	2	2	2	2	2	1	1	2	2	2	1	1	1	1	2	1	1	2
NAMURK40	Native American	2	1	1	2	1	2	2	2	1	2	1	2	2	1	2	2	1	2	2	2	1	1	2	2	2	1	1	2	1	2	1	1	1
NAMWPI18	Native American	1	1	1	2	1	1	1	2	2	2	1	2	2	1	2	2	1	2	2	2	1	1	1	2	2	1	1	2	1	2	1	1	1
NAMWPI46	Native American	1	2	1	2	1	2	2	2	1	2	1	2	2	1	2	2	1	2	2	2	1	1	2	1	2	1	1	1	1	2	1	1	2
NAMWPI58	Native American	2	1	1	2	1	1	2	2	2	2	1	2	2	1	2	2	1	2	2	2	1	1	2	2	2	1	1	1	1	2	1	1	2
NAMWPI63	Native American	1	1	1	2	1	2	2	2	1	2	1	2	2	1	2	2	1	2	2	2	1	1	1	1	2	1	1	2	1	2	1	2	1
NAMXIG004	Native American	1	1	1	2	1	1	2	2	1	2	1	2	2	1	2	2	1	2	2	2	1	2	2	1	2	1	1	1	1	2	1	1	1
NAMXIG010	Native American	1	1	1	2	1	2	2	2	1	2	1	2	2	1	2	2	1	2	2	2	1	2	2	2	2	1	1	1	1	2	1	2	1
NAMXIG013	Native American	1	2	2	2	2	1	2	2	2	2	1	2	2	1	2	2	1	2	2	2	1	2	2	2	2	1	1	1	1	2	1	2	1
NAMXIG014	Native American	1	2	2	2	2	1	2	1	2	2	1	2	2	1	2	2	1	2	2	2	1	1	1	2	2	1	1	1	1	2	1	2	1
NAMXIG015	Native American	1	2	1	2	1	1	2	2	1	2	1	2	2	1	2	2	1	2	2	2	1	1	1	2	2	1	1	2	1	2	1	2	1
NAMXIG016	Native American	1	2	1	2	1	2	2	2	1	2	1	2	2	1	2	2	1	2	2	2	1	2	2	2	2	1	1	1	1	2	1	2	1
NAMXIG017	Native American	2	2	2	2	2	1	2	2	1	2	1	2	2	1	2	2	1	2	2	2	1	2	2	1	2	1	1	1	1	2	1	1	1
NAMXIG018	Native American	1	1	1	2	1	2	2	2	1	2	1	2	2	1	2	2	1	2	2	2	1	2	1	1	2	1	1	1	1	2	1	2	1
NAMXIG030	Native American	1	2	2	2	2	1	1	2	2	2	1	2	2	1	2	2	1	2	2	2	1	2	1	1	2	1	1	1	1	2	1	1	1
NAMXIK50	Native American	1	1	1	1	1	2	2	2	1	2	1	2	2	1	2	2	1	2	2	2	1	1	1	2	2	1	1	1	1	2	1	2	1
NAMXIK64	Native American	2	2	2	1	2	2	2	2	1	2	1	2	2	1	2	2	1	2	2	2	1	1	2	2	2	1	1	1	1	2	1	1	2
NAMXIK69	Native American	2	1	2	2	2	2	2	2	1	2	1	2	2	1	2	2	1	2	2	2	1	1	2	2	2	1	1	1	1	2	1	1	2
NAMXIK74	Native American	1	2	1	2	1	2	2	2	1	2	1	2	2	1	2	2	1	2	2	2	1	1	1	1	2	1	1	1	1	2	1	2	2
MTRA100N	North	1	2	2	2	2	2	1	2	1	2	1	2	2	1	2	2	1	2	2	1	1	2	2	2	1	2	2	2	1	2	1	1	2
MTRA142N	North	1	2	2	2	2	2	1	1	2	2	1	2	1	1	2	2	1	2	2	2	1	1	2	1	2	1	1	1	1	2	1	1	1
MTRA143N	North	1	2	2	2	2	2	1	1	2	2	1	2	2	1	2	2	2	2	2	2	1	2	1	2	2	1	1	1	1	2	1	2	1
MTRA144N	North	2	2	2	2	2	2	1	1	1	2	1	2	2	1	2	2	1	2	2	2	1	1	2	1	2	1	1	1	1	2	1	0	2
MTRA175N	North	1	1	1	1	2	1	2	2	2	2	1	2	2	1	2	2	2	2	2	2	2	2	1	2	1	2	2	2	1	2	1	1	2
MTRA177N	North	2	1	1	1	1	1	2	2	2	1	1	2	2	1	2	2	1	1	1	2	1	1	2	0	1	2	2	1	1	2	1	2	1
MTRA188N	North	2	1	1	1	2	2	1	2	2	2	1	2	2	1	2	2	1	2	1	2	1	1	2	1	2	1	1	1	1	2	1	2	2
MTRA189N	North	2	2	2	1	2	2	2	1	1	2	1	2	2	2	2	2	2	2	2	2	1	2	2	2	1	2	2	1	1	2	1	2	1
MTRA190N	North	1	2	1	1	2	2	2	1	1	2	1	2	2	1	2	2	1	2	2	2	1	1	1	2	2	1	1	2	1	2	1	2	2
MTRA193N	North	2	2	1	1	2	1	2	2	1	2	1	2	2	1	2	2	2	2	2	2	1	2	1	1	2	1	1	1	2	2	1	2	1
MTRA197N	North	1	1	2	2	2	0	0	0	2	2	1	2	2	1	2	2	1	2	2	2	1	1	2	1	2	1	1	1	1	2	1	2	2
MTRA85N	North	1	2	2	2	2	2	2	1	1	2	1	2	2	1	2	2	1	2	2	2	1	1	2	2	1	2	2	1	2	1	2	2	1
MTRA86N	North	1	2	1	1	2	2	1	1	1	2	1	2	2	1	2	2	2	2	2	2	1	1	1	2	2	1	1	1	1	2	1	1	1
MTRA87N	North	2	2	2	2	1	1	1	1	2	2	1	2	2	1	2	2	1	2	2	2	1	1	2	2	1	2	2	2	1	2	1	1	1
MTRA88N	North	2	2	1	1	2	2	1	1	1	2	1	2	2	1	2	2	1	2	2	1	1	2	2	1	2	1	1	2	1	2	1	2	1
MTRA89N	North	2	1	1	1	2	2	1	1	1	2	1	2	2	1	2	2	1	2	2	2	1	1	2	2	2	1	1	1	2	2	1	2	1
MTRA90N	North	1	2	1	1	1	1	2	2	2	2	1	2	2	1	2	2	1	2	2	2	1	1	1	2	2	1	1	1	1	2	1	1	1
MTRA91N	North	2	2	1	1	2	1	2	2	2	2	1	2	2	1	2	2	1	2	2	2	1	1	2	2	2	1	1	1	1	2	1	2	1
MTRA92N	North	1	1	1	1	2	2	2	2	2	2	1	2	2	1	2	2	1	2	2	2	1	1	1	2	2	1	1	1	1	2	1	2	1
MTRA93N	North	2	2	2	2	2	2	2	1	1	2	1	2	2	1	2	2	1	2	2	2	2	2	2	2	1	2	2	1	1	2	1	2	1
MTRA94N	North	2	2	2	2	2	2	2	1	2	2	1	2	2	1	2	2	2	1	2	1	2	1	2	2	2	1	1	2	1	2	1	1	2
MTRA95N	North	2	2	2	2	2	2	2	1	1	2	1	2	2	2	2	2	1	2	2	2	2	2	1	1	1	2	2	2	1	2	1	2	2
MTRA96N	North	1	2	2	2	2	2	2	1	1	2	1	2	2	1	2	2	1	2	2	2	1	2	1	1	2	2	2	1	1	2	1	1	1
MTRA97N	North	2	1	2	2	2	2	2	1	1	1	2	1	2	1	2	2	2	2	2	2	1	2	1	1	2	1	1	1	1	2	1	2	2
MTRA98N	North	2	2	2	2	2	2	2	1	1	2	1	2	2	1	2	2	1	2	2	2	1	1	1	1	2	1	1	1	1	2	1	1	1
MTRA105C	Center	2	2	1	1	2	2	1	1	1	2	1	2	2	1	2	2	1	2	2	2	1	2	1	2	2	1	1	1	1	2	1	1	1
MTRA106C	Center	2	2	2	2	2	2	1	1	2	2	1	2	2	1	2	2	2	2	2	2	1	2	1	2	2	1	1	2	1	2	1	2	1
MTRA107C	Center	2	2	2	1	2	2	1	1	1	2	1	2	2	2	2	2	2	2	2	1	1	1	2	2	1	2	2	1	2	2	1	1	2
MTRA109C	Center	2	2	2	2	2	2	2	1	1	2	1	2	2	1	2	2	2	2	2	2	1	2	1	2	1	2	2	2	2	1	1	1	1
MTRA110C	Center	1	1	1	1	1	1	2	2	2	2	1	2	2	1	2	2	2	2	2	2	2	2	2	1	2	1	1	1	1	2	1	2	1
MTRA111C	Center	1	1	2	2	1	2	2	2	1	2	1	2	2	1	2	2	1	2	2	2	1	1	2	1	2	1	1	1	1	2	1	2	1
MTRA118C	Center	1	1	2	2	1	1	2	2	2	2	1	2	2	1	2	2	1	2	2	2	1	2	2	2	1	1	2	2	1	2	1	1	1
MTRA123C	Center	2	2	2	2	1	2	1	1	2	0	0	0	1	1	2	2	1	2	2	1	2	2	1	2	2	1	1	2	2	1	2	2	2
MTRA126C	Center	2	2	2	2	2	2	2	1	1	2	1	2	2	1	2	2	1	2	2	2	1	1	2	2	2	1	1	2	1	2	1	2	2
MTRA129C	Center	1	2	2	2	2	1	2	2	1	2	1	2	2	1	2	2	2	1	2	1	1	2	2	2	1	2	2	1	2	2	1	2	1
MTRA12C	Center	2	2	1	1	2	1	2	2	1	2	1	2	2	1	2	2	2	2	2	1	1	1	2	2	1	2	2	2	1	2	1	1	1
MTRA130C	Center	1	2	1	1	1	2	1	1	1	2	1	2	2	1	2	2	2	2	2	1	1	2	1	1	1	1	1	0	1	2	1	2	1
MTRA132C	Center	2	2	2	2	1	2	2	1	2	2	1	2	2	1	2	2	1	2	2	1	2	2	2	2	2	1	1	2	1	2	1	1	2
MTRA148C	Center	1	2	2	2	2	2	1	1	1	2	1	2	1	1	2	2	1	2	2	2	1	1	1	2	2	1	1	1	1	2	1	1	1
MTRA149C	Center	1	2	1	1	2	1	2	2	2	2	1	2	2	1	2	2	2	2	2	2	1	1	1	1	2	1	1	1	1	2	1	2	1
MTRA14C	Center	1	1	2	2	2	1	2	2	2	2	1	2	2	2	2	2	1	2	2	2	1	1	1	2	2	1	1	1	1	2	1	1	1
MTRA150C	Center	1	1	1	1	2	2	2	1	1	2	1	2	2	1	2	2	1	2	2	2	1	1	1	2	2	1	1	2	1	2	1	2	2
MTRA152C	Center	2	2	2	2	2	1	2	2	2	2	1	2	2	1	2	2	1	2	2	2	1	2	1	2	1	2	2	2	2	2	1	2	1
MTRA154C	Center	1	2	2	2	2	1	2	2	2	2	1	2	2	2	2	2	1	2	2	2	1	1	1	1	2	1	1	1	1	2	1	1	1
MTRA155C	Center	1	2	1	1	2	1	2	2	1	2	1	2	2	1	2	2	1	2	2	2	1	1	1	2	1	2	2	1	1	2	1	1	1
MTRA156C	Center	1	2	2	2	2	1	2	2	2	2	1	2	1	1	2	2	2	2	2	2	1	2	2	1	1	2	2	2	1	2	1	1	1
MTRA15C	Center	1	1	1	1	1	1	2	2	2	2	1	2	2	2	2	2	1	2	2	2	1	1	2	2	1	2	2	1	2	2	1	2	1
MTRA161C	Center	1	2	2	2	2	2	1	1	1	2	1	2	2	2	2	2	1	2	2	2	1	2	1	1	1	1	1	2	1	2	1	0	1
MTRA162C	Center	1	2	2	2	2	2	2	1	2	2	1	2	2	1	2	2	1	2	2	2	2	2	1	2	2	1	1	2	1	2	1	2	1
MTRA163C	Center	2	1	2	2	2	1	2	2	2	2	1	2	2	1	2	2	1	2	2	2	1	1	1	2	1	2	2	2	2	2	1	2	1
MTRA164C	Center	2	2	1	1	2	2	2	1	1	2	1	2	2	1	2	2	2	2	2	2	1	1	2	2	1	2	2	2	1	2	1	2	2
MTRA166C	Center	1	1	1	1	2	1	2	2	2	2	1	2	2	1	2	2	1	2	2	2	1	2	1	1	2	1	1	2	1	2	1	2	1
MTRA167C	Center	2	1	2	2	2	2	1	1	1	1	2	1	1	1	2	2	2	2	2	2	1	1	2	2	1	1	2	2	1	2	1	2	2
MTRA168C	Center	2	2	2	2	2	2	2	1	1	2	1	2	2	1	1	2	2	2	2	2	1	2	2	1	1	2	2	1	1	2	1	2	1
MTRA169C	Center	1	2	1	1	2	1	2	2	2	2	1	2	2	1	2	1	2	2	2	2	1	2	2	1	2	1	1	1	1	2	1	2	1
MTRA16C	Center	2	2	1	1	2	2	1	1	1	1	2	1	1	1	1	2	1	2	2	1	1	2	2	2	1	2	2	2	1	2	2	2	1
MTRA170C	Center	2	2	2	2	1	1	2	2	2	2	1	2	2	1	2	2	2	2	2	1	1	2	2	2	2	1	1	2	1	2	1	1	1
MTRA171C	Center	2	2	2	2	2	2	2	1	2	2	1	2	2	1	2	2	1	2	2	2	1	2	2	2	2	1	1	2	2	2	1	2	1
MTRA172C	Center	1	1	2	2	2	1	2	2	1	2	1	2	2	1	2	2	2	2	1	2	2	1	2	1	2	1	1	2	1	2	1	2	1
MTRA173C	Center	1	2	1	1	2	1	2	2	2	2	1	2	2	1	1	2	2	2	1	2	2	2	2	1	2	1	1	1	1	2	1	1	1
MTRA17C	Center	2	2	1	1	2	2	2	1	1	2	1	2	2	1	2	2	1	2	2	2	1	2	1	2	2	1	1	2	1	2	1	2	2
MTRA184C	Center	2	2	2	2	1	2	2	1	1	1	2	1	2	2	2	2	1	2	2	1	1	1	2	1	2	1	1	1	1	2	1	1	1
MTRA187C	Center	1	1	2	2	1	2	1	1	2	1	2	1	1	1	2	2	1	2	2	2	2	2	1	2	1	2	2	2	2	2	1	2	1
MTRA19C	Center	2	2	2	2	2	2	2	1	1	2	1	2	2	1	2	2	2	2	2	2	1	1	2	2	2	1	1	1	1	2	1	1	1
MTRA1C	Center	2	2	1	1	2	2	2	1	2	2	1	2	2	1	2	2	2	2	2	2	2	2	2	2	1	2	2	1	1	2	1	2	1
MTRA21C	Center	2	1	2	2	2	2	1	1	2	2	1	2	1	1	2	2	1	2	2	2	1	2	1	2	2	1	1	1	1	2	1	1	1
MTRA23C	Center	1	2	1	1	1	1	2	2	1	2	1	2	2	1	2	2	1	2	2	2	1	1	2	1	2	1	1	1	1	2	1	2	2
MTRA25C	Center	1	1	1	1	2	2	1	1	2	2	1	2	1	2	2	2	2	2	2	1	1	2	2	1	2	1	1	2	1	2	1	2	2
MTRA26C	Center	2	2	2	2	2	2	1	1	2	2	1	2	2	2	2	2	2	1	2	1	1	2	2	2	2	1	1	2	1	2	1	1	1
MTRA27C	Center	2	2	1	1	2	2	2	2	1	2	1	2	2	2	2	2	1	2	2	2	1	1	2	2	1	2	2	1	1	2	1	1	1
MTRA28C	Center	2	2	2	2	1	1	2	2	2	1	2	2	1	1	2	2	2	1	2	2	1	2	2	2	1	2	2	2	1	2	1	2	1
MTRA29C	Center	2	2	1	1	2	2	1	1	1	2	1	2	2	1	2	2	2	2	2	1	1	2	1	2	1	2	2	1	1	2	1	1	1
MTRA30C	Center	2	2	2	2	2	2	2	2	1	2	1	2	2	1	2	2	1	2	2	2	1	1	1	1	2	1	1	2	1	2	1	1	2
MTRA31C	Center	1	1	1	1	2	1	2	2	2	2	1	2	2	1	2	2	2	2	0	2	1	2	2	2	1	2	2	1	1	2	1	2	1
MTRA32C	Center	2	2	2	2	2	2	2	1	2	1	2	1	2	2	2	2	2	2	2	1	1	2	1	2	1	2	2	2	2	2	1	1	2
MTRA33C	Center	2	2	1	1	2	1	2	2	1	1	2	2	2	1	2	2	2	2	2	2	1	1	2	2	2	2	2	2	1	2	1	2	2
MTRA35C	Center	2	2	1	1	2	2	2	1	1	2	1	2	2	2	2	2	1	2	2	1	2	2	1	1	1	2	2	2	1	2	1	2	1
MTRA36C	Center	2	2	2	2	2	2	2	1	2	2	1	2	2	1	2	2	1	2	2	2	1	2	1	2	1	2	2	2	1	2	1	2	1
MTRA37C	Center	1	2	2	2	2	1	2	2	2	2	1	2	2	1	2	2	1	2	2	2	1	2	1	2	2	2	2	2	1	2	1	1	1
MTRA38C	Center	1	2	2	2	2	2	1	1	2	2	1	2	2	1	2	2	2	2	2	2	1	2	2	2	1	2	2	2	1	2	1	2	1
MTRA39C	Center	2	2	1	1	2	2	2	1	1	2	1	2	2	1	2	2	1	2	2	1	1	2	2	1	1	2	2	1	1	2	1	2	1
MTRA3C	Center	1	1	1	1	2	1	2	2	2	2	1	2	2	1	2	2	1	2	2	2	1	1	1	1	2	1	1	1	1	2	1	2	1
MTRA40C	Center	2	2	1	1	2	2	2	2	1	2	1	2	2	1	2	2	2	2	2	1	1	1	2	2	1	2	2	1	2	1	2	1	1
MTRA41C	Center	2	1	2	2	2	2	2	1	2	1	2	1	2	2	2	2	1	2	2	2	1	2	1	1	2	1	1	1	1	2	1	1	1
MTRA42C	Center	2	2	1	1	2	2	2	1	2	2	1	2	2	1	2	2	2	2	2	2	1	1	2	1	2	1	1	1	1	2	1	1	1
MTRA43C	Center	2	2	2	2	2	2	2	1	1	2	1	2	2	1	2	2	1	2	2	2	1	1	1	2	2	1	1	1	1	2	1	2	1
MTRA44C	Center	1	2	1	1	2	1	2	2	2	2	1	2	2	1	2	2	2	2	2	1	1	2	1	2	2	2	2	1	1	2	1	2	2
MTRA45C	Center	1	2	1	1	2	1	2	2	2	2	1	2	2	1	2	2	1	2	2	1	1	2	1	2	1	2	2	2	1	2	1	2	1
MTRA46C	Center	1	1	2	2	2	1	2	2	1	2	1	2	2	1	2	2	1	2	2	2	1	1	1	2	1	2	2	2	1	2	1	1	1
MTRA47C	Center	1	2	1	1	2	2	2	1	1	2	1	2	1	1	2	2	1	2	2	2	1	2	1	1	1	2	2	1	1	2	1	2	1
MTRA49C	Center	2	2	2	1	2	2	1	1	1	2	1	2	2	1	2	2	2	2	2	2	1	2	2	2	1	2	2	2	1	2	1	1	1
MTRA50C	Center	1	1	1	1	2	1	2	2	1	2	1	2	2	1	2	2	2	2	2	1	1	2	1	2	2	1	1	2	1	2	1	1	2
MTRA60C	Center	2	2	2	2	2	2	2	1	2	2	1	2	1	1	2	2	1	2	2	1	1	1	2	2	2	1	1	1	1	2	1	2	1
MTRA6C	Center	2	2	1	1	2	1	2	2	1	2	1	2	2	1	2	2	1	2	2	2	1	1	1	1	1	2	2	2	1	2	1	1	1
MTRA73C	Center	1	2	1	1	1	2	2	1	1	2	1	2	2	1	2	2	1	2	2	2	1	1	1	1	2	1	1	2	1	2	1	2	2
MTRA108S	South	1	2	1	1	2	1	2	2	2	2	1	2	2	1	2	2	1	2	2	2	1	2	2	1	2	1	1	2	1	2	1	1	1
MTRA112S	South	2	1	1	1	2	1	2	2	1	2	1	2	2	1	2	2	2	2	2	2	2	2	1	2	2	2	2	1	1	2	1	1	1
MTRA113S	South	1	2	2	1	2	2	2	1	1	2	1	2	2	1	2	2	1	2	2	1	1	2	1	2	1	2	2	2	2	2	1	2	1
MTRA115S	South	2	2	1	1	1	2	2	1	2	2	1	2	2	1	2	2	1	2	2	2	1	1	1	2	2	1	1	2	1	2	1	2	1
MTRA117S	South	2	2	2	2	2	2	1	1	2	2	1	2	2	2	2	2	2	2	2	2	2	2	2	2	1	2	2	1	1	2	1	1	1
MTRA120S	South	1	1	2	2	1	2	2	2	1	2	1	2	2	1	2	2	1	2	2	2	1	1	2	1	2	1	1	1	1	2	1	2	1
MTRA121S	South	2	2	2	2	2	1	2	2	2	2	1	2	2	1	2	2	1	2	2	2	1	2	1	2	1	2	2	1	1	2	1	1	2
MTRA124S	South	2	1	2	2	2	2	1	1	1	2	1	2	2	1	2	2	2	2	2	2	1	2	2	1	1	2	2	2	1	2	1	2	1
MTRA125S	South	2	2	2	2	2	1	2	2	2	2	1	2	2	1	2	2	1	2	2	1	1	2	2	2	2	1	1	2	2	1	2	1	1
MTRA131S	South	2	2	2	2	1	2	1	1	1	2	1	2	1	1	2	2	1	2	2	2	1	1	2	2	2	1	1	1	1	2	1	2	1
MTRA133S	South	2	1	1	1	1	2	1	2	1	2	1	2	2	1	2	2	1	2	2	2	1	1	2	1	2	1	1	2	1	2	1	1	1
MTRA134S	South	2	2	2	2	1	2	2	2	1	1	2	1	2	1	2	2	1	2	2	2	1	2	2	2	1	1	1	2	2	2	1	1	1
MTRA135S	South	2	2	2	2	1	2	1	1	2	1	2	1	2	1	2	2	1	2	2	2	1	1	2	1	2	1	1	2	1	2	1	2	2
MTRA136S	South	1	2	2	2	1	2	2	1	1	2	1	2	2	1	2	2	1	1	1	2	1	2	2	2	1	0	0	2	1	2	1	2	1
MTRA137S	South	1	1	2	2	2	2	2	2	2	2	1	2	2	2	2	2	2	2	2	1	1	1	2	2	1	2	2	2	1	2	1	2	2
MTRA13S	South	2	2	2	2	2	1	2	2	2	2	1	2	2	1	2	2	1	2	2	1	1	2	1	2	1	2	2	2	1	2	1	1	1
MTRA140S	South	2	2	2	1	2	2	2	1	2	2	1	2	2	1	2	2	2	2	2	2	1	2	2	2	2	1	1	1	2	2	1	1	2
MTRA141S	South	1	2	2	2	2	2	2	2	1	2	1	2	2	1	1	2	1	2	2	2	1	1	2	2	1	2	2	1	1	2	1	1	1
MTRA178S	South	2	2	2	2	2	2	2	1	2	2	1	2	2	1	2	2	2	2	2	1	1	2	1	2	1	2	2	2	1	1	1	1	1
MTRA183S	South	1	2	2	2	2	1	2	2	2	2	1	2	2	1	2	2	1	2	2	2	1	1	2	2	1	2	2	2	1	2	1	1	1
MTRA185S	South	1	2	1	1	2	2	1	1	2	2	1	2	2	2	2	2	2	2	2	2	1	2	2	1	1	2	2	2	1	2	1	1	1
MTRA186S	South	2	2	2	2	2	2	1	1	2	2	1	2	2	1	2	2	2	2	2	2	1	2	1	1	1	2	2	1	1	2	1	2	1
MTRA191S	South	1	1	2	1	2	2	2	1	2	2	1	2	2	1	2	2	1	2	2	2	1	2	2	2	1	1	2	2	2	1	1	2	1
MTRA192S	South	1	1	1	1	2	1	2	2	1	2	1	2	2	1	2	2	1	2	2	2	1	1	2	1	2	1	1	1	1	2	1	2	1
MTRA194S	South	1	1	2	2	2	1	2	2	2	2	1	2	2	1	2	2	1	2	2	2	1	1	1	2	1	2	2	1	1	2	1	2	1
MTRA195S	South	2	2	1	1	2	2	1	1	1	2	1	2	2	1	2	2	2	2	2	1	1	1	2	2	1	1	2	1	1	2	1	2	1
MTRA198S	South	2	2	2	2	2	2	2	1	1	2	1	2	2	2	2	2	1	2	2	1	2	2	1	2	2	1	1	1	1	1	2	2	1
MTRA199S	South	2	2	2	2	2	2	2	1	1	2	1	2	2	1	2	2	2	2	2	2	1	1	2	2	1	1	2	1	2	1	2	1	1
MTRA34S	South	2	1	1	1	1	2	1	1	2	2	1	2	2	1	2	2	2	2	2	1	1	2	1	2	2	1	1	1	1	2	1	1	1
